# Supplementary material for: Direct allylic C(sp 3 )–H acylation of alkenes via metallaphotoredox catalysis using carboxylic acids
Source: Royal Society of Chemistry journal article supplement (doi:10.1039/d5gc04541j), 2025-11-24

## Supporting Information

### Direct Allylic C(sp<sup>3</sup>)-H Acylation of Alkenes via Metallaphotoredox Catalysis Using Carboxylic Acids

Xin Ge<sup>a</sup>, Can-Quan Ye<sup>a</sup>, Mei Huang<sup>a</sup>, Meng-Ning Wang<sup>a</sup>, Jie-Yu  
Chen<sup>a</sup>, Ri-Yuan Tang<sup>a,b,c\*</sup>, Bo Yang<sup>a,b\*</sup>

<sup>a</sup>Key Laboratory for Biobased Materials and Energy of Ministry of Education, College of Materials and Energy, South China Agricultural University, Guangzhou 510642, P. R. China.

<sup>b</sup>Key Laboratory of Advanced Materials for Facility Agriculture, Ministry of Agriculture and Rural Affairs, College of Materials and Energy, South China Agricultural University, Guangzhou, 510641, P. R. China.

<sup>c</sup>National Key Laboratory of Green Pesticide, College of Materials and Energy, South China Agricultural University, Guangzhou, 510641, P. R. China.

Corresponding author: Ri-Yuan Tang, [rytang@scau.edu.cn](mailto:rytang@scau.edu.cn); Bo Yang, [boyang@scau.edu.cn](mailto:boyang@scau.edu.cn)

## Table of Contents

|                                                                                            |    |
|--------------------------------------------------------------------------------------------|----|
| I. General Information .....                                                               | 3  |
| II. Optimization of the Reaction Conditions.....                                           | 4  |
| III. General Procedure for Direct Allylic C(sp <sup>3</sup> )-H Acylation of Alkenes ..... | 8  |
| IV. Late-stage functionalization of bioactive molecules.....                               | 39 |
| V. Synthetic applications and large-scale synthesis .....                                  | 42 |
| VI. Mechanistic studies.....                                                               | 50 |
| VII. Supplementary References .....                                                        | 57 |
| VIII. NMR spectra .....                                                                    | 58 |

## I. General Information

Dry *i*PrOAc was purchased from suppliers and used directly. Unless stated otherwise, reactions were performed in flame-dried glassware. Analytical thin layer chromatography (TLC) was performed on precoated silica gel 60 F254 plates and visualization on TLC was achieved by UV light (254 and 365 nm) or by phosphomolybdic acid. Flash column chromatography was performed on silica gel (300-400 mesh). Unless otherwise noted, all the corresponding carboxylic acids and alkenes from suppliers were used directly without further purification.  $^1\text{H}$  and  $^{13}\text{C}$  NMR spectra were recorded in  $\text{CDCl}_3$  on a Bruker AV500 or Bruker AV300 instrument. Chemical shifts are reported in parts per million (ppm) and are referenced to the residual solvent signals were used as references for  $^1\text{H}$  and  $^{13}\text{C}$  NMR spectra ( $\text{CDCl}_3$ :  $\delta \text{H} = 7.26 \text{ ppm}$ ,  $\delta \text{C} = 77.16 \text{ ppm}$ ). Mesitylene was used as an internal standard to calculate NMR yields. The following abbreviations (or combinations thereof) were used to explain multiplicities: s = singlet, d = doublet, t = triplet, m = multiplet. HRMS were obtained using Waters G2-XS Q-TOF LC/MS (ESI) mass spectrometer. All manipulations were conducted under Schlenk tubes and stirred (1000 rpm) at a distance of 2 cm from the irradiating plate. Blue LEDs (30 W) purchased from JIADENG (LS) was used for blue light irradiation. A fan attached to the apparatus was used to maintain the reaction temperature maintain a temperature of  $25\text{ }^\circ\text{C} - 30\text{ }^\circ\text{C}$ .

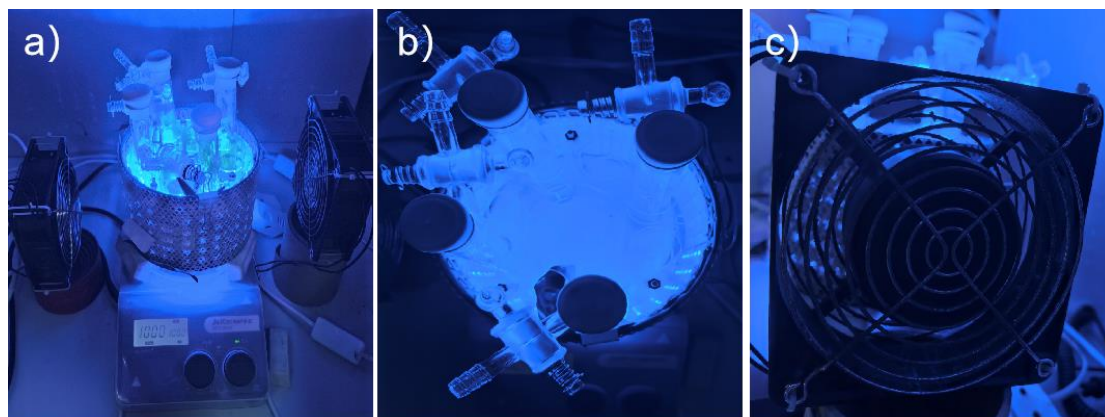

**Set-up for the photoredox reactions**

**a) front view**

**b) top view**

**c) lateral view**

## II. Optimization of the Reaction Conditions

**Table S1. The Effect of Photocatalyst<sup>a</sup>**

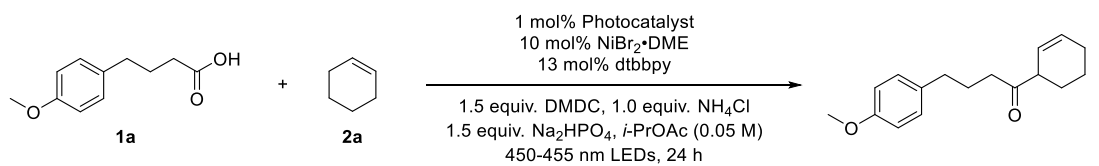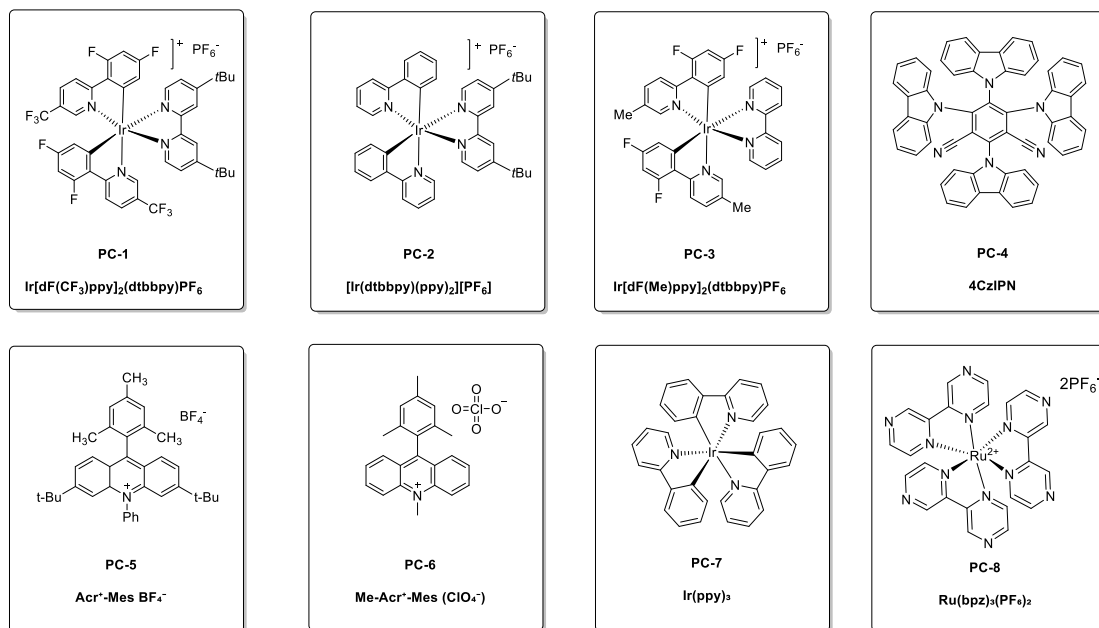

| Entry | Photocatalyst | Yield(%) <sup>b</sup> |
|-------|---------------|-----------------------|
| 1     | PC-1          | 42                    |
| 2     | PC-2          | <10                   |
| 3     | PC-3          | 22                    |
| 4     | PC-4          | trace                 |
| 5     | PC-5          | trace                 |
| 6     | PC-6          | n.d.                  |
| 7     | PC-7          | n.d.                  |
| 8     | PC-8          | n.d.                  |

<sup>a</sup> General conditions, unless otherwise noted: **1a** (0.3 mmol), **2a** (0.6 mmol), NiBr<sub>2</sub>·DME (0.03 mmol), dtbbpy (0.039 mmol), photocatalyst (0.003 mmol), Na<sub>2</sub>HPO<sub>4</sub> (0.45 mmol), NH<sub>4</sub>Cl (0.3 mmol), DMDC (0.45mmol) and *i*PrOAc (6.0 mL) under N<sub>2</sub> atmosphere. <sup>b</sup> Determined by <sup>1</sup>H NMR spectroscopy with mesitylene as an internal standard. n.d., not detected.

**Table S2. The Effect of the amount of photocatalysts<sup>a</sup>**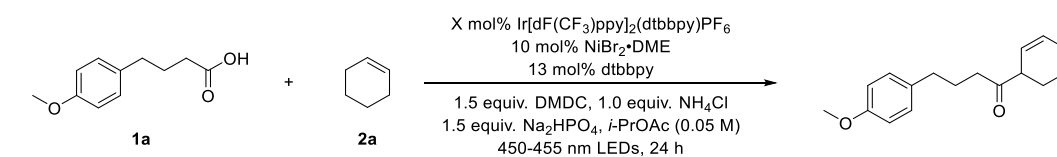

| Entry | X   | Yield (%) <sup>b</sup> |
|-------|-----|------------------------|
| 1     | 0   | n.d.                   |
| 2     | 1   | 42                     |
| 3     | 2.5 | 25                     |
| 4     | 5   | 5                      |

<sup>a</sup> General conditions, unless otherwise noted: **1a** (0.3 mmol), **2a** (0.6 mmol), NiBr<sub>2</sub>·DME (0.03 mmol), dtbbpy (0.039 mmol), Ir[dF(CF<sub>3</sub>)ppy]<sub>2</sub>(dtbbpy)PF<sub>6</sub> (0.003 mmol), Na<sub>2</sub>HPO<sub>4</sub> (0.45 mmol), NH<sub>4</sub>Cl (0.3 mmol), DMDC (0.45 mmol) and *i*PrOAc (6.0 mL) under N<sub>2</sub> atmosphere. <sup>b</sup> Determined by <sup>1</sup>H NMR spectroscopy with mesitylene as an internal standard. n.d., not detected.

**Table S3. The Effect of different solvents<sup>a</sup>**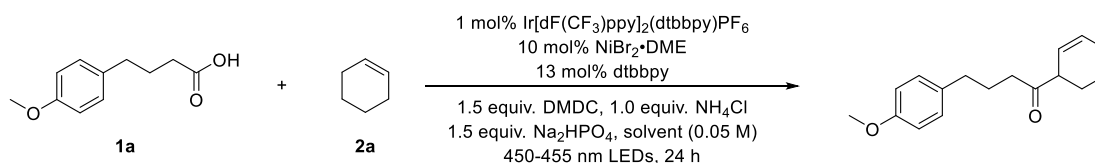

| Entry           | Solvent           | Yield (%) <sup>b</sup> |
|-----------------|-------------------|------------------------|
| 1               | EA                | 30                     |
| 2               | THF               | 17                     |
| 3               | MeCN              | 17                     |
| 4               | DMSO              | 0                      |
| 5               | <i>t</i> -BuOMe   | 11                     |
| 6               | PhCl              | <10                    |
| 7               | PhCF <sub>3</sub> | 24                     |
| 8               | DCM               | 14                     |
| 9               | DCE               | <10                    |
| 10              | <i>i</i> PrOAc    | 42                     |
| 11              | Dioxane           | 32                     |
| 12              | benzene           | 32                     |
| 13              | DMAc              | <10                    |
| 14              | DMF               | <10                    |
| 15              | Acetone           | 24                     |
| 16              | <i>i</i> PrOH     | <10                    |
| 17              | DME               | n.d.                   |
| 18 <sup>c</sup> | <i>i</i> PrOAc    | 36                     |
| 19 <sup>d</sup> | <i>i</i> PrOAc    | 15                     |

<sup>a</sup> General conditions, unless otherwise noted: **1a** (0.3 mmol), **2a** (0.6 mmol), NiBr<sub>2</sub>·DME (0.03

mmol), dtbbpy (0.039 mmol), Ir[dF(CF<sub>3</sub>)ppy]<sub>2</sub>(dtbbpy)PF<sub>6</sub> (3.6 mg, 0.003 mmol), Na<sub>2</sub>HPO<sub>4</sub> (0.45 mmol), NH<sub>4</sub>Cl (0.3 mmol), DMDC (0.45 mmol) and solvent (6.0 mL) under N<sub>2</sub> atmosphere. <sup>b</sup> Determined by <sup>1</sup>H NMR spectroscopy with mesitylene as an internal standard. <sup>c</sup> 0.1 M. <sup>d</sup> 0.03 M. n.d., not detected.

**Table S4. The Effect of Ligand<sup>a</sup>**

|                                                                                     |                                                                                      |                                                                                      |                                                                                       |  |  |  |  |
|-------------------------------------------------------------------------------------|--------------------------------------------------------------------------------------|--------------------------------------------------------------------------------------|---------------------------------------------------------------------------------------|--|--|--|--|
| 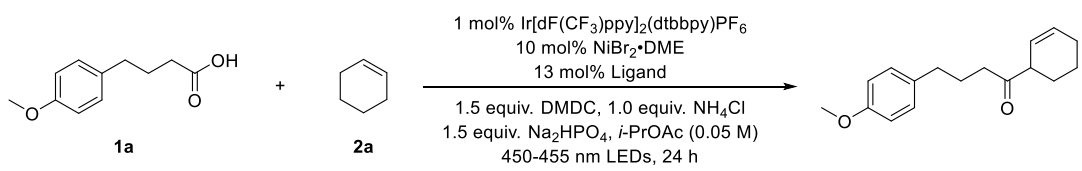  |                                                                                      |                                                                                      |                                                                                       |  |  |  |  |
|    |     |    |    |  |  |  |  |
| L1 42% <sup>b</sup>                                                                 | L2 25% <sup>b</sup>                                                                  | L3 trace                                                                             | L4 10% <sup>b</sup>                                                                   |  |  |  |  |
|    |     |    |    |  |  |  |  |
| L5 trace                                                                            | L6 <10% <sup>b</sup>                                                                 | L7 17% <sup>b</sup>                                                                  | L8 trace                                                                              |  |  |  |  |
|  |   |  |  |  |  |  |  |
| L9 <10% <sup>b</sup>                                                                | L10 <10% <sup>b</sup>                                                                | L11 <10% <sup>b</sup>                                                                | L12 <10% <sup>b</sup>                                                                 |  |  |  |  |
|  |  |                                                                                      |                                                                                       |  |  |  |  |
| L13 <10% <sup>b</sup>                                                               | L14 n.d.                                                                             |                                                                                      |                                                                                       |  |  |  |  |

<sup>a</sup> General conditions, unless otherwise noted: **1a** (0.3 mmol), **2a** (0.6 mmol), NiBr<sub>2</sub>·DME (0.03 mmol), ligand (0.039 mmol), Ir[dF(CF<sub>3</sub>)ppy]<sub>2</sub>(dtbbpy)PF<sub>6</sub> (0.003 mmol), Na<sub>2</sub>HPO<sub>4</sub> (0.45 mmol), NH<sub>4</sub>Cl (0.3 mmol), DMDC (0.45 mmol) and *i*PrOAc (6.0 mL) under N<sub>2</sub> atmosphere. <sup>b</sup> Determined by <sup>1</sup>H NMR spectroscopy with mesitylene as an internal standard. n.d., not detected.

**Table S5. The Effect of Ni-catalyst<sup>a</sup>**

| 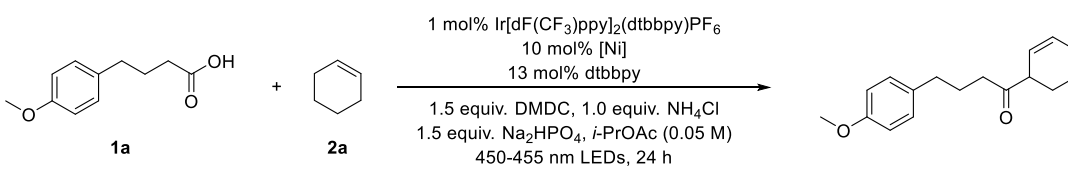 |                                                    |                       |  |
|--------------------------------------------------------------------------------------|----------------------------------------------------|-----------------------|--|
| Entry                                                                                | [Ni]                                               | Yield(%) <sup>b</sup> |  |
| 1                                                                                    | NiCl <sub>2</sub> (PPh <sub>3</sub> ) <sub>2</sub> | n.d.                  |  |

|   |                                                    |      |
|---|----------------------------------------------------|------|
| 2 | Ni(acac) <sub>2</sub>                              | n.d. |
| 3 | Ni(dppe)Cl <sub>2</sub>                            | n.d. |
| 4 | NiBr <sub>2</sub> (PPh <sub>3</sub> ) <sub>2</sub> | 27   |
| 5 | NiCl <sub>2</sub>                                  | n.d. |
| 6 | NiBr <sub>2</sub> •DME                             | 42   |
| 7 | NiCl <sub>2</sub> •DME                             | n.d. |
| 8 | NiBr <sub>2</sub>                                  | 22   |

<sup>a</sup> General conditions, unless otherwise noted: **1a** (0.3 mmol), **2a** (0.6 mmol), [Ni] (0.03 mmol), dtbbpy (0.039 mmol), Ir[dF(CF<sub>3</sub>)ppy]<sub>2</sub>(dtbbpy)PF<sub>6</sub> (0.003 mmol), Na<sub>2</sub>HPO<sub>4</sub> (0.45 mmol), NH<sub>4</sub>Cl (0.3 mmol), DMDC (0.45 mmol) and *i*PrOAc (6.0 mL) under N<sub>2</sub> atmosphere. <sup>b</sup> Determined by <sup>1</sup>H NMR spectroscopy with mesitylene as an internal standard. n.d., not detected.

**Table S6. The Effect of base<sup>a</sup>**

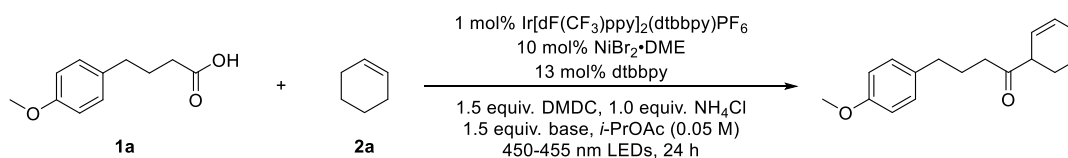

| Entry | Base                             | Yield (%) <sup>b</sup> |
|-------|----------------------------------|------------------------|
| 1     | Na <sub>2</sub> HPO <sub>4</sub> | 42                     |
| 2     | K <sub>2</sub> CO <sub>3</sub>   | trace                  |
| 3     | CS <sub>2</sub> CO <sub>3</sub>  | 0                      |
| 4     | K <sub>2</sub> HPO <sub>4</sub>  | 37                     |
| 5     | DBU                              | n.d.                   |
| 6     | TMG                              | 0                      |
| 7     | 2,6-lutidine                     | 30                     |
| 8     | pyridine                         | 18                     |
| 9     | K <sub>3</sub> PO <sub>4</sub>   | 0                      |
| 10    | NaHCO <sub>3</sub>               | 40                     |
| 11    | KOtBu                            | trace                  |
| 12    | KHCO <sub>3</sub>                | 24                     |
| 13    | NaOAc                            | n.d.                   |
| 14    | Et <sub>3</sub> N                | n.d.                   |

<sup>a</sup> General conditions, unless otherwise noted: **1a** (0.3 mmol), **2a** (0.6 mmol), NiBr<sub>2</sub>•DME (0.03 mmol), dtbbpy (0.039 mmol), Ir[dF(CF<sub>3</sub>)ppy]<sub>2</sub>(dtbbpy)PF<sub>6</sub> (0.003 mmol), base (0.45 mmol), NH<sub>4</sub>Cl (0.3 mmol), DMDC (0.45 mmol) and *i*PrOAc (6.0 mL) under N<sub>2</sub> atmosphere. <sup>b</sup> Determined by <sup>1</sup>H NMR spectroscopy with mesitylene as an internal standard. n.d., not detected.

**Table S7. Control Experiments<sup>a</sup>**

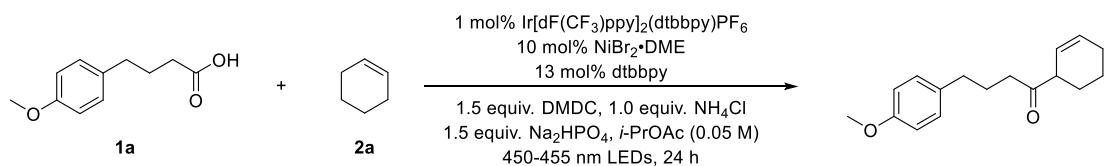

| Entry | Variation from “standard conditions”       | Yield(%) <sup>b</sup> |
|-------|--------------------------------------------|-----------------------|
| 1     | 2.0 equiv Na <sub>2</sub> HPO <sub>4</sub> | 35                    |
| 2     | 2.5 equiv Na <sub>2</sub> HPO <sub>4</sub> | 36                    |
| 3     | 10% NiBr <sub>2</sub> ·DME, 13% dtbbpy     | 42                    |
| 4     | 20% NiBr <sub>2</sub> ·DME, 26% dtbbpy     | 62                    |
| 5     | 12 h instead of 24 h                       | 55                    |
| 6     | <b>1a/2a</b> =1/2                          | 62 <sup>c</sup>       |
| 7     | <b>1a/2a</b> =1/3                          | 56                    |
| 8     | <b>1a/2a</b> =1/4                          | 54                    |
| 9     | 2.0 equiv. DMDC                            | 31                    |
| 10    | Boc <sub>2</sub> O instead of DMDC         | n.d.                  |
| 11    | no NH <sub>4</sub> Cl                      | 53                    |
| 12    | no DMDC                                    | n.d.                  |
| 13    | no light                                   | n.d.                  |
| 14    | no Ni and ligand                           | n.d.                  |
| 15    | no photocatalyst                           | n.d.                  |

<sup>a</sup> General conditions, unless otherwise noted: **1a** (0.3 mmol), **2a** (0.6 mmol), NiBr<sub>2</sub>·DME (0.03 mmol), dtbbpy (0.039 mmol), Ir[dF(CF<sub>3</sub>)ppy]<sub>2</sub>(dtbbpy)PF<sub>6</sub> (0.003 mmol), Na<sub>2</sub>HPO<sub>4</sub> (0.45 mmol), NH<sub>4</sub>Cl (0.3 mmol), DMDC (0.45 mmol) and *i*PrOAc (6.0 mL) under N<sub>2</sub> atmosphere. <sup>b</sup> Determined by <sup>1</sup>H NMR spectroscopy with mesitylene as an internal standard. <sup>c</sup> Isolated yield. n.d., not detected.

### III. General Procedure for Direct Allylic C(sp<sup>3</sup>)-H Acylation of Alkenes

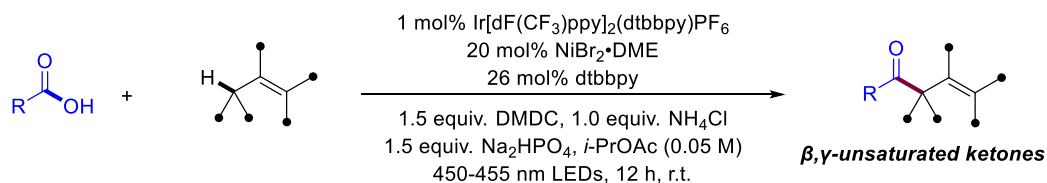

#### General procedure A:

An oven-dried 25 mL flask was evacuated and back-filled with N<sub>2</sub> for three times. After cooling at room temperature, Ir[dF(CF<sub>3</sub>)ppy]<sub>2</sub>(dtbbpy)PF<sub>6</sub> (0.003 mmol), dtbbpy (**L1**) (0.078 mmol), Na<sub>2</sub>HPO<sub>4</sub> (0.45 mmol), NH<sub>4</sub>Cl (0.3 mmol), NiBr<sub>2</sub>·DME (0.06 mmol), carboxylic acid (0.3 mmol), DMDC (0.45 mmol) and *i*PrOAc (3 mL) were added sequentially under N<sub>2</sub> atmosphere. The reaction



mixture was stirred at room temperature for 30 min. Then alkene (0.6 mmol) and *i*PrOAc (3 mL) was injected through the syringe into the mentioned above flask. The resulting crude mixture was then allowed to stir at room temperature and irradiated by 450-455 nm LEDs at a distance of 2 cm for 12 h at room temperature. After 12 h, the reaction mixture was then passed through a short pad of silica gel using EtOAc/PE (1/5) as the eluent (~25 mL). The resulting mixture was concentrated, and the residue was purified by flash chromatography on silica gel to afford the desired ketone.

**(Cyclohex-2-en-1-yl)-4-(4-methoxyphenyl)butan-1-one (3)**

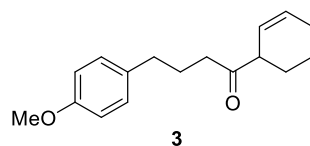

Prepared according to the general procedure A employing Ir[dF(CF<sub>3</sub>)ppy]<sub>2</sub>(dtbbpy)PF<sub>6</sub> (3.6 mg, 0.003 mmol), dtbbpy (**L1**) (20.9 mg, 0.078 mmol), Na<sub>2</sub>HPO<sub>4</sub> (63.9 mg, 0.45 mmol), NH<sub>4</sub>Cl (16.3 mg, 0.3 mmol), NiBr<sub>2</sub>·DME (18.5 mg, 0.06 mmol), 4-(4-methoxyphenyl)butyric acid (58.2 mg, 0.3 mmol), DMDC (60.3 mg, 48 μL, 0.45 mmol), a teflon stir bar, cyclohexene (49.3 mg, 61 μL, 0.6 mmol) and *i*PrOAc (6 mL). After 12 h, the reaction mixture was then passed through a short pad of silica gel using EtOAc/PE (1/5) as the eluent (~25 mL). The resulting mixture was concentrated, and the residue was purified by flash chromatography (PE/EA = 10/1) on silica gel to afford **3** (48.1 mg, 0.186 mmol, 62% yield) as a colorless liquid.

**<sup>1</sup>H NMR** (400 MHz, CDCl<sub>3</sub>) δ 7.08 (d, *J* = 8.4 Hz, 2H), 6.82 (d, *J* = 8.4 Hz, 2H), 5.89 – 5.82 (m, 1H), 5.73 – 5.66 (m, 1H), 3.79 (s, 3H), 3.13 – 3.03 (m, 1H), 2.56 (t, *J* = 7.6 Hz, 2H), 2.48 (t, *J* = 7.2 Hz, 2H), 2.05 – 1.97 (m, 2H), 1.91 – 1.84 (m, 2H), 1.82 – 1.66 (m, 3H), 1.61 – 1.51 (m, 1H).

**<sup>13</sup>C NMR** (101 MHz, CDCl<sub>3</sub>) δ 211.8, 157.8, 133.7, 130.0, 129.3, 124.1, 113.7, 55.2, 48.9, 39.7, 34.2, 25.4, 24.8, 24.7, 20.8.

**HRMS** (ESI) for C<sub>17</sub>H<sub>23</sub>O<sub>2</sub><sup>+</sup> [(M+H)<sup>+</sup>]: calculated 259.1693, found 259.1683.

**1-(Cyclohex-2-en-1-yl)-3-(3-methoxyphenyl)propan-1-one (4)**

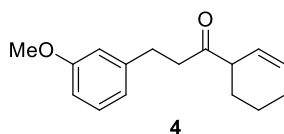

Prepared according to the general procedure A employing Ir[dF(CF<sub>3</sub>)ppy]<sub>2</sub>(dtbbpy)PF<sub>6</sub> (3.6 mg, 0.003 mmol), dtbbpy (**L1**) (20.9 mg, 0.078 mmol), Na<sub>2</sub>HPO<sub>4</sub> (63.9 mg, 0.45 mmol), NH<sub>4</sub>Cl (16.3

mg, 0.3 mmol), NiBr<sub>2</sub>·DME (18.5 mg, 0.06 mmol), 3-(3-methoxyphenyl)propionic acid (54.2 mg, 0.3 mmol), DMDC (60.3 mg, 48 μL, 0.45 mmol), a teflon stir bar, cyclohexene (49.3 mg, 61 μL, 0.6 mmol) and *i*PrOAc (6 mL). After 12 h, the reaction mixture was then passed through a short pad of silica gel using EtOAc/PE (1/5) as the eluent (~25 mL). The resulting mixture was concentrated, and the residue was purified by flash chromatography (PE/EA = 10/1) on silica gel to afford **4** (43.9 mg, 0.18 mmol, 60% yield) as a colorless liquid.

**<sup>1</sup>H NMR** (300 MHz, CDCl<sub>3</sub>) δ 7.22 – 7.16 (m, 1H), 6.78 – 6.72 (m, 3H), 5.89 – 5.83 (m, 1H), 5.74 – 5.68 (m, 1H), 3.79 (s, 3H), 3.11 – 3.05 (m, 1H), 2.90 – 2.85 (m, 2H), 2.81 – 2.76 (m, 2H), 2.05 – 1.94 (m, 2H), 1.85 – 1.66 (m, 3H), 1.58 – 1.49 (m, 1H).

**<sup>13</sup>C NMR** (126 MHz, CDCl<sub>3</sub>) δ 211.1, 159.8, 143.1, 130.4, 129.6, 124.1, 120.9, 114.3, 111.5, 55.3, 49.2, 42.3, 30.0, 24.9, 24.8, 20.9.

**HRMS** (ESI) calcd for C<sub>16</sub>H<sub>21</sub>O<sub>2</sub><sup>+</sup> [(M+H)<sup>+</sup>]: calculated 245.1536, found 245.1534.

#### 1-(Cyclohex-2-en-1-yl)-3-(*o*-tolyl)propan-1-one (**5**)

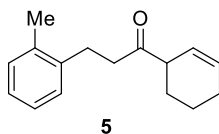

Prepared according to the general procedure A employing Ir[dF(CF<sub>3</sub>)ppy]<sub>2</sub>(dtbbpy)PF<sub>6</sub> (3.6 mg, 0.003 mmol, 1%), dtbbpy (**L1**) (20.9 mg, 0.078 mmol), Na<sub>2</sub>HPO<sub>4</sub> (63.9 mg, 0.45 mmol), NH<sub>4</sub>Cl (16.2 mg, 0.3 mmol), NiBr<sub>2</sub>·DME (18.5 mg, 0.06 mmol), 3-(2-methylphenyl)propanoic acid (49.2 mg, 0.3 mmol), DMDC (60.3 mg, 48 μL, 0.45 mmol), a teflon stir bar, cyclohexene (49.3 mg, 61 μL, 0.6 mmol) and *i*PrOAc (6 mL). After 12 h, the reaction mixture was then passed through a short pad of silica gel using EtOAc/PE (1/5) as the eluent (~25 mL). The resulting mixture was concentrated, and the residue was purified by flash chromatography (PE/EA = 10/1) on silica gel to afford **5** (39.7 mg, 0.174 mmol, 58% yield) as a colorless liquid.

**<sup>1</sup>H NMR** (300 MHz, CDCl<sub>3</sub>) δ 7.17 – 7.09 (m, 4H), 5.99 – 5.81 (m, 1H), 5.78 – 5.68 (m, 1H), 3.16 – 3.04 (m, 1H), 2.92 – 2.85 (m, 2H), 2.79 – 2.71 (m, 2H), 2.31 (s, 3H), 2.05 – 1.98 (m, 2H), 1.85 – 1.68 (m, 3H), 1.61 – 1.51 (m, 1H).

**<sup>13</sup>C NMR** (126 MHz, CDCl<sub>3</sub>) δ 211.3, 139.5, 136.1, 130.4, 130.4, 128.8, 126.4, 126.2, 124.1, 49.2, 41.0, 27.3, 24.9, 24.8, 20.9, 19.4.

**HRMS** (ESI) calcd for C<sub>16</sub>H<sub>21</sub>O<sup>+</sup> [(M+H)<sup>+</sup>]: calculated 229.1587, found 229.1581.

### 1-(Cyclohex-2-en-1-yl)-3-(p-tolyl)propan-1-one (**6**)

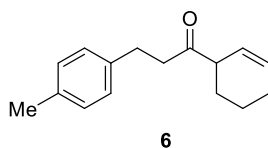

Prepared according to the general procedure A employing Ir[dF(CF<sub>3</sub>)ppy]<sub>2</sub>(dtbbpy)PF<sub>6</sub> (3.6 mg, 0.003 mmol), dtbbpy (**L1**) (20.9 mg, 0.078 mmol), Na<sub>2</sub>HPO<sub>4</sub> (63.9 mg, 0.45 mmol), NH<sub>4</sub>Cl (16mg, 0.3 mmol), NiBr<sub>2</sub>·DME (18.5 mg, 0.06 mmol), 3-(4-methylphenyl)propionic acid (49.2mg, 0.3 mmol), DMDC (60.3 mg, 48 μL, 0.45 mmol), a teflon stir bar, cyclohexene (49.3 mg, 61 μL, 0.6 mmol) and *i*PrOAc (6 mL). After 12 h, the reaction mixture was then passed through a short pad of silica gel using EtOAc/PE (1/5) as the eluent (~25 mL). The resulting mixture was concentrated, and the residue was purified by flash chromatography (PE/EA = 10/1) on silica gel to afford **6** (43.8 mg, 0.192 mmol, 64% yield) as a colorless liquid.

**<sup>1</sup>H NMR** (300 MHz, CDCl<sub>3</sub>) δ 7.11 – 7.06 (m, 4H), 6.02 – 5.77 (m, 1H), 5.76 – 5.66 (m, 1H), 3.11 – 3.03 (m, 1H), 2.89 – 2.83 (m, 2H), 2.81 – 2.70 (m, 2H), 2.31 (s, 3H), 2.04 – 1.97 (m, 2H), 1.83 – 1.68 (m, 3H), 1.60 – 1.49 (m, 1H).

**<sup>13</sup>C NMR** (126 MHz, CDCl<sub>3</sub>) δ 211.2, 138.3, 135.6, 130.2, 129.2, 128.4, 128.3, 124.1, 49.2, 42.6, 29.6, 24.9, 24.8, 21.1, 20.9.

**HRMS** (ESI) calcd for C<sub>16</sub>H<sub>20</sub>ONa<sup>+</sup> [(M+Na)<sup>+</sup>]: calculated 251.1406, found 251.1388.

### 1-(Cyclohex-2-en-1-yl)-3-(m-tolyl)propan-1-one (**7**)

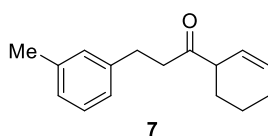

Prepared according to the general procedure A employing Ir[dF(CF<sub>3</sub>)ppy]<sub>2</sub>(dtbbpy)PF<sub>6</sub> (3.6 mg, 0.003 mmol), dtbbpy (**L1**) (20.9 mg, 0.078 mmol), Na<sub>2</sub>HPO<sub>4</sub> (63.9 mg, 0.45 mmol), NH<sub>4</sub>Cl (16.3 mg, 0.3 mmol), NiBr<sub>2</sub>·DME (18.5 mg, 0.06 mmol), 3-(3-methylphenyl)propanoic acid (49.2 mg, 0.3 mmol), DMDC (60.3 mg, 48 μL, 0.45 mmol), a teflon stir bar, cyclohexene (49.3 mg, 61 μL, 0.6 mmol) and *i*PrOAc (6 mL). After 12 h, the reaction mixture was then passed through a short pad of silica gel using EtOAc/PE (1/5) as the eluent (~25 mL). The resulting mixture was concentrated, and the residue was purified by flash chromatography (PE/EA = 10/1) on silica gel to afford **7** (36.3 mg, 0.159 mmol, 53% yield) as a colorless liquid.

**<sup>1</sup>H NMR** (300 MHz, CDCl<sub>3</sub>) δ 7.20 – 7.14 (m, 1H), 7.03 – 6.96 (m, 3H), 5.90 – 5.83 (m, 1H), 5.74 – 5.69 (m, 1H), 3.12 – 3.04 (m, 1H), 2.89 – 2.83 (m, 2H), 2.81 – 2.75 (m, 2H), 2.32 (s, 3H), 2.05 – 1.97 (m, 2H), 1.82 – 1.66 (m, 3H), 1.59 – 1.50 (m, 1H).

**<sup>13</sup>C NMR** (126 MHz, CDCl<sub>3</sub>) δ 211.2, 141.4, 138.2, 130.3, 129.3, 128.5, 126.9, 125.4, 124.2, 49.2, 42.47, 29.9, 24.9, 24.8, 21.5, 20.9.

**HRMS** (ESI) calcd for C<sub>16</sub>H<sub>21</sub>O<sup>+</sup> [(M+H)<sup>+</sup>]: calculated 229.1587, found 229.1582.

#### 1-(Cyclohex-2-en-1-yl)-3-(3,4-dimethylphenyl)propan-1-one (**8**)

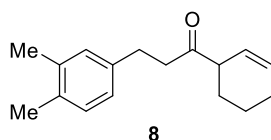

Prepared according to the general procedure A employing Ir[dF(CF<sub>3</sub>)ppy]<sub>2</sub>(dtbbpy)PF<sub>6</sub> (3.6 mg, 0.003 mmol), dtbbpy (**L1**) (20.9 mg, 0.078 mmol), Na<sub>2</sub>HPO<sub>4</sub> (63.9 mg, 0.45 mmol), NH<sub>4</sub>Cl (16.2 mg, 0.3 mmol), NiBr<sub>2</sub>·DME (18.5 mg, 0.06 mmol), 3-(3,4-dimethylphenyl)propanoic acid (53.4 mg, 0.3 mmol), DMDC (60.3 mg, 48 μL, 0.45 mmol), a teflon stir bar, cyclohexene (49.3 mg, 61 μL, 0.6 mmol) and *i*PrOAc (6 mL). After 12 h, the reaction mixture was then passed through a short pad of silica gel using EtOAc/PE (1/5) as the eluent (~25 mL). The resulting mixture was concentrated, and the residue was purified by flash chromatography (PE/EA = 10/1) on silica gel to afford **8** (43.5 mg, 0.18 mmol, 60% yield) as a colorless liquid.

**<sup>1</sup>H NMR** (300 MHz, CDCl<sub>3</sub>) δ 7.04 (d, *J* = 7.6 Hz, 1H), 6.97 – 6.89 (m, 2H), 5.92 – 5.81 (m, 1H), 5.74 – 5.69 (m, 1H), 3.1 – 3.05 (m, 1H), 2.85 – 2.73 (m, 4H), 2.23 (s, 3H), 2.22 (s, 3H), 2.04 – 1.97 (m, 2H), 1.85 – 1.58 (m, 4H).

**<sup>13</sup>C NMR** (126 MHz, CDCl<sub>3</sub>) δ 211.3, 138.8, 136.7, 134.3, 130.3, 129.9, 129.8, 125.8, 124.2, 49.2, 42.7, 29.6, 24.9, 24.9, 20.9, 19.8, 19.4.

**HRMS** (ESI) calcd for C<sub>17</sub>H<sub>22</sub>ONa<sup>+</sup> [(M+Na)<sup>+</sup>]: calculated 265.1563, found 265.1557.

#### 1-(Cyclohex-2-en-1-yl)-3-(3,4-dimethoxyphenyl)propan-1-one (**9**)

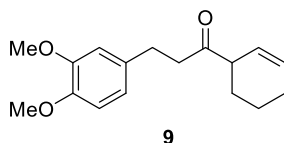

Prepared according to the general procedure A employing Ir[dF(CF<sub>3</sub>)ppy]<sub>2</sub>(dtbbpy)PF<sub>6</sub> (3.6 mg, 0.003 mmol), dtbbpy (**L1**) (20.9 mg, 0.078 mmol), Na<sub>2</sub>HPO<sub>4</sub> (63.9 mg, 0.45 mmol), NH<sub>4</sub>Cl (16.1

mg, 0.3 mmol), NiBr<sub>2</sub>·DME (18.5 mg, 0.06 mmol), 3,4-dimethoxyhydrocinnamic acid (63.1 mg, 0.3 mmol), DMDC (60.3 mg, 48 μL, 0.45 mmol), a teflon stir bar, cyclohexene (49.3 mg, 61 μL, 0.6 mmol) and *i*PrOAc (6 mL). After 12 h, the reaction mixture was then passed through a short pad of silica gel using EtOAc/PE (1/5) as the eluent (~25 mL). The resulting mixture was concentrated, and the residue was purified by flash chromatography (PE/EA = 10/1) on silica gel to afford **9** (50.1 mg, 0.183 mmol, 61% yield) as a colorless liquid.

**<sup>1</sup>H NMR** (300 MHz, CDCl<sub>3</sub>) δ 6.78 (d, *J* = 8.7 Hz, 1H), 6.71 (dd, *J* = 5.5, 2.0 Hz, 2H), 6.06 – 5.79 (m, 1H), 5.76 – 5.64 (m, 1H), 3.86 (s, 3H), 3.84 (s, 3H), 3.11 – 3.03 (m, 1H), 2.87 – 2.81 (m, 2H), 2.81 – 2.70 (m, 2H), 2.05 – 1.95 (m, 2H), 1.80 – 1.68 (m, 3H), 1.59 – 1.48 (m, 1H).

**<sup>13</sup>C NMR** (126 MHz, CDCl<sub>3</sub>) δ 211.3, 148.9, 147.4, 134.1, 130.3, 124.1, 120.3, 111.9, 111.5, 56.1, 55.9, 49.2, 42.6, 29.6, 24.8, 24.8, 20.9.

**HRMS** (ESI) calcd for C<sub>17</sub>H<sub>22</sub>O<sub>3</sub>Na<sup>+</sup> [(M+Na)<sup>+</sup>]: calculated 297.1461, found 297.1451.

#### 1-(Cyclohex-2-en-1-yl)-3-(3,5-dimethylphenyl)propan-1-one (**10**)

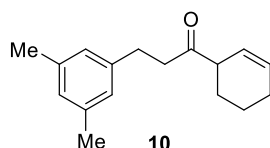

Prepared according to the general procedure A employing Ir[dF(CF<sub>3</sub>)ppy]<sub>2</sub>(dtbbpy)PF<sub>6</sub> (3.6 mg, 0.003 mmol), dtbbpy (**L1**) (20.9 mg, 0.078 mmol), Na<sub>2</sub>HPO<sub>4</sub> (63.9 mg, 0.45 mmol), NH<sub>4</sub>Cl (16.1 mg, 0.3 mmol), NiBr<sub>2</sub>·DME (18.5 mg, 0.06 mmol), 3-(3,5-dimethylphenyl)propanoic acid (53.4 mg, 0.3 mmol), DMDC (60.3 mg, 48 μL, 0.45 mmol), a teflon stir bar, cyclohexene (49.3 mg, 61 μL, 0.6 mmol) and *i*PrOAc (6 mL). After 12 h, the reaction mixture was then passed through a short pad of silica gel using EtOAc/PE (1/5) as the eluent (~25 mL). The resulting mixture was concentrated, and the residue was purified by flash chromatography (PE/EA = 10/1) on silica gel to afford **10** (40.7 mg, 0.168 mmol, 56% yield) as a colorless liquid.

**<sup>1</sup>H NMR** (300 MHz, CDCl<sub>3</sub>) δ 6.82 (d, *J* = 9.4 Hz, 3H), 5.99 – 5.80 (m, 1H), 5.75 – 5.69 (m, 1H), 3.12 – 3.04 (m, 1H), 2.85 – 2.73 (m, 4H), 2.28 (s, 6H), 2.04 – 1.97 (m, 2H), 1.83 – 1.67 (m, 3H), 1.60 – 1.54 (m, 1H).

**<sup>13</sup>C NMR** (126 MHz, CDCl<sub>3</sub>) δ 211.3, 141.4, 138.1, 130.3, 127.8, 126.3, 124.2, 49.2, 44.8, 42.6, 29.9, 24.9, 24.9, 21.4, 20.9.

**HRMS** (ESI) calcd for C<sub>17</sub>H<sub>23</sub>O<sup>+</sup> [(M+H)<sup>+</sup>]: calculated 243.1743, found 243.1739.

### 1-(Cyclohex-2-en-1-yl)-3-phenylpropan-1-one (**11**)

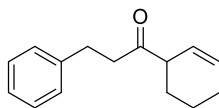

**11**

Prepared according to the general procedure A employing Ir[dF(CF<sub>3</sub>)ppy]<sub>2</sub>(dtbbpy)PF<sub>6</sub> (3.6 mg, 0.003 mmol), dtbbpy (**L1**) (20.9 mg, 0.078 mmol), Na<sub>2</sub>HPO<sub>4</sub> (63.9 mg, 0.45 mmol), NH<sub>4</sub>Cl (16.1 mg, 0.3 mmol), NiBr<sub>2</sub>·DME (18.5 mg, 0.06 mmol), 3-phenylpropionic acid (45.1 mg, 0.3 mmol), DMDC (60.3 mg, 48 μL, 0.45 mmol), a teflon stir bar, cyclohexene (49.3 mg, 61 μL, 0.6 mmol) and *i*PrOAc (6 mL). After 12 h, the reaction mixture was then passed through a short pad of silica gel using EtOAc/PE (1/5) as the eluent (~25 mL). The resulting mixture was concentrated, and the residue was purified by flash chromatography (PE/EA = 10/1) on silica gel to afford **11** (34.6 mg, 0.162 mmol, 54% yield) as a colorless liquid.

**<sup>1</sup>H NMR** (300 MHz, CDCl<sub>3</sub>) δ 7.32 – 7.24 (m, 2H), 7.23 – 7.14 (m, 3H), 5.94 – 5.80 (m, 1H), 5.77 – 5.63 (m, 1H), 3.13 – 3.03 (m, 1H), 2.94 – 2.86 (m, 2H), 2.85 – 2.71 (m, 2H), 2.06 – 1.95 (m, 2H), 1.83 – 1.66 (m, 3H), 1.57 – 1.49 (m, 1H).

**<sup>13</sup>C NMR** (126 MHz, CDCl<sub>3</sub>) δ 211.1, 141.5, 130.4, 128.6, 128.5, 126.2, 124.1, 49.2, 42.4, 29.9, 24.9, 24.8, 20.9.

**HRMS** (ESI) calcd for C<sub>15</sub>H<sub>19</sub>O<sup>+</sup> [(M+H)<sup>+</sup>]: calculated 215.1430, found 215.1426.

### 1-(Cyclohex-2-en-1-yl)-3-(4-ethylphenyl)propan-1-one (**12**)

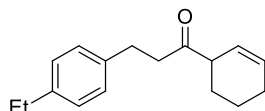

**12**

Prepared according to the general procedure A employing Ir[dF(CF<sub>3</sub>)ppy]<sub>2</sub>(dtbbpy)PF<sub>6</sub> (3.6 mg, 0.003 mmol), dtbbpy (**L1**) (20.9 mg, 0.078 mmol), Na<sub>2</sub>HPO<sub>4</sub> (63.9 mg, 0.45 mmol), NH<sub>4</sub>Cl (16.1 mg, 0.3 mmol), NiBr<sub>2</sub>·DME (18.5 mg, 0.06 mmol), 3-(4-ethylphenyl)propanoic acid (53.4 mg, 0.3 mmol), DMDC (60.3 mg, 48 μL, 0.45 mmol), a teflon stir bar, cyclohexene (49.3 mg, 61 μL, 0.6 mmol) and *i*PrOAc (6 mL). After 12 h, the reaction mixture was then passed through a short pad of silica gel using EtOAc/PE (1/5) as the eluent (~25 mL). The resulting mixture was concentrated, and the residue was purified by flash chromatography (PE/EA = 10/1) on silica gel to afford **12** (42.8 mg, 0.177 mmol, 59% yield) as a colorless liquid.

**<sup>1</sup>H NMR** (300 MHz, CDCl<sub>3</sub>) δ 7.14 – 7.09 (m, 4H), 5.99 – 5.80 (m, 1H), 5.78 – 5.61 (m, 1H), 3.16 – 3.02 (m, 1H), 2.91 – 2.74 (m, 4H), 2.61 (q, *J* = 7.8 Hz, 2H), 2.07 – 1.93 (m, 2H), 1.82 – 1.67 (m, 3H), 1.57 – 1.46 (m, 1H), 1.22 (t, *J* = 7.8 Hz, 3H).

**<sup>13</sup>C NMR** (126 MHz, CDCl<sub>3</sub>) δ 211.3, 142.1, 138.6, 130.3, 128.4, 128.1, 124.2, 49.2, 42.5, 29.6, 28.6, 24.9, 24.8, 21.0, 15.8.

**HRMS** (ESI) calcd for C<sub>17</sub>H<sub>23</sub>O<sup>+</sup> [(M+H)<sup>+</sup>]: calculated 243.1743, found 243.1726.

#### 2-(4-(Tert-butyl)phenyl)-1-(cyclohex-2-en-1-yl)propan-1-one(**13**)

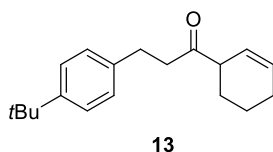

Prepared according to the general procedure A employing Ir[dF(CF<sub>3</sub>)ppy]<sub>2</sub>(dtbbpy)PF<sub>6</sub> (3.6 mg, 0.003 mmol), dtbbpy (**L1**) (20.9 mg, 0.078 mmol), Na<sub>2</sub>HPO<sub>4</sub> (63.9 mg, 0.45 mmol), NH<sub>4</sub>Cl (16.2 mg, 0.3 mmol), NiBr<sub>2</sub>·DME (18.5 mg, 0.06 mmol), 3-(4-*tert*-butyl-phenyl)-propionic acid (61.8 mg, 0.3 mmol), DMDC (60.3 mg, 48 μL, 0.45 mmol), a teflon stir bar, cyclohexene (49.3 mg, 61 μL, 0.6 mmol) and *i*PrOAc (6 mL). After 12 h, the reaction mixture was then passed through a short pad of silica gel using EtOAc/PE (1/5) as the eluent (~25 mL). The resulting mixture was concentrated, and the residue was purified by flash chromatography (PE/EA = 10/1) on silica gel to afford **13** (54.3 mg, 0.20 mmol, 67% yield) as a colorless liquid.

**<sup>1</sup>H NMR** (300 MHz, CDCl<sub>3</sub>) δ 7.30 (d, *J* = 8.4 Hz, 2H), 7.12 (d, *J* = 8.4 Hz, 2H), 5.93 – 5.80 (m, 1H), 5.78 – 5.64 (m, 1H), 3.15 – 3.04 (m, 1H), 2.91 – 2.72 (m, 4H), 2.05 – 1.97 (m, 2H), 1.84 – 1.66 (m, 3H), 1.58 – 1.51 (m, 1H), 1.30 (s, 9H).

**<sup>13</sup>C NMR** (126 MHz, CDCl<sub>3</sub>) δ 211.3, 149.0, 138.3, 130.3, 128.1, 125.5, 124.2, 49.2, 42.4, 34.5, 31.5, 29.4, 24.9, 24.9, 20.9.

**HRMS** (ESI) calcd for C<sub>19</sub>H<sub>26</sub>O<sup>+</sup> [(M+H)<sup>+</sup>]: calculated 271.2056, found 271.2051.

#### 4-([1,1'-Biphenyl]-4-yl)-1-(cyclohex-2-en-1-yl)butan-1-one(**14**)

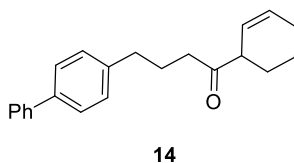

Prepared according to the general procedure A employing Ir[dF(CF<sub>3</sub>)ppy]<sub>2</sub>(dtbbpy)PF<sub>6</sub> (3.6 mg, 0.003 mmol), dtbbpy (**L1**) (20.9 mg, 0.078 mmol), Na<sub>2</sub>HPO<sub>4</sub> (63.9 mg, 0.45 mmol), NH<sub>4</sub>Cl (16.3 mg, 0.3 mmol), NiBr<sub>2</sub>·DME (18.5 mg, 0.06 mmol), 4-(4-biphenyl)butyric acid (72.1 mg, 0.3 mmol), DMDC (60.3 mg, 48 μL, 0.45 mmol), a teflon stir bar, cyclohexene (49.3 mg, 61 μL, 0.6 mmol) and *i*PrOAc (6 mL). After 12 h, the reaction mixture was then passed through a short pad of silica gel using EtOAc/PE (1/5) as the eluent (~25 mL). The resulting mixture was concentrated, and the residue was purified by flash chromatography (PE/EA = 10/1) on silica gel to afford **14** (63.8 mg, 0.21 mmol, 70% yield) as a colorless liquid.

**<sup>1</sup>H NMR** (300 MHz, CDCl<sub>3</sub>) δ 7.61 – 7.55 (m, 2H), 7.52 (d, *J* = 8.1 Hz, 2H), 7.43 (t, *J* = 7.8 Hz, 2H), 7.32 (t, *J* = 7.2 Hz, 1H), 7.23 (d, *J* = 7.8 Hz, 2H), 5.94 – 5.80 (m, 1H), 5.74 – 5.68 (m, 1H), 3.12 – 3.06 (m, 1H), 2.66 (t, *J* = 7.8 Hz, 2H), 2.53 (t, *J* = 7.2 Hz, 2H), 2.08 – 1.89 (m, 4H), 1.85 – 1.68 (m, 3H), 1.61 (d, *J* = 6.4 Hz, 1H).

**<sup>13</sup>C NMR** (126 MHz, CDCl<sub>3</sub>) δ 211.9, 141.2, 140.9, 139.0, 130.3, 129.0, 128.9, 127.3, 127.2, 127.1, 124.3, 49.1, 39.9, 34.9, 25.3, 25.0, 24.9, 21.0.

**HRMS** (ESI) calcd for C<sub>24</sub>H<sub>24</sub>ONa<sup>+</sup> [(M+Na)<sup>+</sup>]: calculated 327.1719, found 327.1713.

### 3-(3-Chlorophenyl)-1-(cyclohex-2-en-1-yl)propan-1-one (**15**)

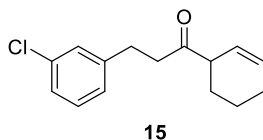

Prepared according to the general procedure A employing Ir[dF(CF<sub>3</sub>)ppy]<sub>2</sub>(dtbbpy)PF<sub>6</sub> (3.6 mg, 0.003 mmol), dtbbpy (**L1**) (20.9 mg, 0.078 mmol), Na<sub>2</sub>HPO<sub>4</sub> (63.9 mg, 0.45 mmol), NH<sub>4</sub>Cl (16.2 mg, 0.3 mmol), NiBr<sub>2</sub>·DME (18.5 mg, 0.06 mmol), 3-(3-chlorophenyl)propanoic acid (55.3 mg, 0.3 mmol), DMDC (60.3 mg, 48 μL, 0.45 mmol), a teflon stir bar, cyclohexene (49.3 mg, 61 μL, 0.6 mmol) and *i*PrOAc (6 mL). After 12 h, the reaction mixture was then passed through a short pad of silica gel using EtOAc/PE (1/5) as the eluent (~25 mL). The resulting mixture was concentrated, and the residue was purified by flash chromatography (PE/EA = 10/1) on silica gel to afford **15** (52.1 mg, 0.21 mmol, 70% yield) as a colorless liquid.

**<sup>1</sup>H NMR** (300 MHz, CDCl<sub>3</sub>) δ 7.19 – 7.16 (m, 3H), 7.09 – 7.05 (m, 1H), 5.93 – 5.81 (m, 1H), 5.77 – 5.64 (m, 1H), 3.10 – 3.04 (m, 1H), 2.90 – 2.83 (m, 2H), 2.83 – 2.70 (m, 2H), 2.04 – 1.97 (m, 2H), 1.83 – 1.68 (m, 3H), 1.59 – 1.51 (m, 1H).



<sup>13</sup>C NMR (126 MHz, CDCl<sub>3</sub>) δ 210.7, 143.5, 134.3, 130.5, 129.9, 128.6, 126.8, 126.4, 124.0, 49.2, 42.0, 29.6, 24.9, 24.8, 20.9.

HRMS (ESI) calcd for C<sub>15</sub>H<sub>18</sub>ClO<sup>+</sup> [(M+H)<sup>+</sup>]: calculated 249.1041, found 249.1037.

#### 4-(4-Chlorophenyl)-1-(cyclohex-2-en-1-yl)butan-1-one (16)

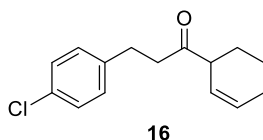

Prepared according to the general procedure A employing Ir[dF(CF<sub>3</sub>)ppy]<sub>2</sub>(dtbbpy)PF<sub>6</sub> (3.6 mg, 0.003 mmol), dtbbpy (**L1**) (20.9 mg, 0.078 mmol), Na<sub>2</sub>HPO<sub>4</sub> (63.9 mg, 0.45 mmol), NH<sub>4</sub>Cl (16.4 mg, 0.3 mmol), NiBr<sub>2</sub>·DME (18.5 mg, 0.06 mmol), 4-chloro-benzenepropanoic acid (55.3 mg, 0.3 mmol), DMDC (60.3 mg, 48 μL, 0.45 mmol), a teflon stir bar, cyclohexene (49.3 mg, 61 μL, 0.6 mmol) and *i*PrOAc (6 mL). After 12 h, the reaction mixture was then passed through a short pad of silica gel using EtOAc/PE (1/5) as the eluent (~25 mL). The resulting mixture was concentrated, and the residue was purified by flash chromatography (PE/EA = 10/1) on silica gel to afford **16** (52.1 mg, 0.21 mmol, 55% yield) as a colorless liquid.

<sup>1</sup>H NMR (300 MHz, CDCl<sub>3</sub>) δ 7.23 (d, *J* = 8.4 Hz, 2H), 7.11 (d, *J* = 8.4 Hz, 2H), 5.96 – 5.80 (m, 1H), 5.74 – 5.65 (m, 1H), 3.12 – 3.01 (m, 1H), 2.92 – 2.84 (m, 2H), 2.79 – 2.74 (m, 2H), 2.00 (d, *J* = 3.2 Hz, 2H), 1.79 – 1.66 (m, 3H), 1.59 – 1.50 (m, 1H).

<sup>13</sup>C NMR (126 MHz, CDCl<sub>3</sub>) δ 210.8, 139.9, 132.0, 130.5, 129.9, 128.7, 124.0, 49.2, 42.1, 29.2, 24.9, 24.8, 20.9.

HRMS (ESI) calcd for C<sub>15</sub>H<sub>18</sub>ClO<sup>+</sup> [(M+H)<sup>+</sup>]: calculated 249.1041, found 249.1031.

#### 1-(Cyclohex-2-en-1-yl)-3-(4-fluorophenyl)propan-1-one (17)

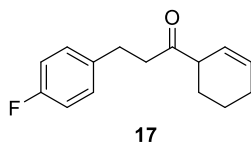

Prepared according to the general procedure A employing Ir[dF(CF<sub>3</sub>)ppy]<sub>2</sub>(dtbbpy)PF<sub>6</sub> (3.6 mg, 0.003 mmol), dtbbpy (**L1**) (20.9 mg, 0.078 mmol), Na<sub>2</sub>HPO<sub>4</sub> (63.9 mg, 0.45 mmol), NH<sub>4</sub>Cl (16.3 mg, 0.3 mmol), NiBr<sub>2</sub>·DME (18.5 mg, 0.06 mmol), 4-fluoro-benzenepropanoic acid (50.4 mg, 0.3 mmol), DMDC (60.3 mg, 48 μL, 0.45 mmol), a teflon stir bar, cyclohexene (49.3 mg, 61 μL, 0.6 mmol) and *i*PrOAc (6 mL). After 12 h, the reaction mixture was then passed through a short pad of

silica gel using EtOAc/PE (1/5) as the eluent (~25 mL). The resulting mixture was concentrated, and the residue was purified by flash chromatography (PE/EA = 10/1) on silica gel to afford **17** (49.4 mg, 0.21 mmol, 71% yield) as a colorless liquid.

**<sup>1</sup>H NMR** (300 MHz, CDCl<sub>3</sub>) δ 7.19 – 7.13 (m, 2H), 7.01 – 6.94 (m, 2H), 5.90 – 5.83 (m, 1H), 5.72 – 5.66 (m, 1H), 3.11 – 3.02 (m, 1H), 2.90–2.85 (m, 2H), 2.80 – 2.74 (m, 2H), 2.03 – 1.97 (m, 2H), 1.81 – 1.65 (m, 3H), 1.58 – 1.50 (m, 1H).

**<sup>13</sup>C NMR** (126 MHz, CDCl<sub>3</sub>) δ 210.9, 161.5(d, *J* = 243.2 Hz), 137.1 (d, *J* = 3.2 Hz), 130.4, 129.9 (d, *J* = 7.8 Hz), 124.0, 115.3 (d, *J* = 21.0 Hz), 49.2, 42.4, 29.1, 24.9, 24.8, 20.9.

**<sup>19</sup>F NMR** (471 MHz, CDCl<sub>3</sub>) δ -117.38.

**HRMS** (ESI) calcd for C<sub>15</sub>H<sub>18</sub>FO<sup>+</sup> [(M+H)<sup>+</sup>]: calculated 233.1336, found 233.1354

### 1-(Cyclohex-2-en-1-yl)-3-(3-fluorophenyl)propan-1-one (**18**)

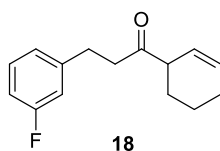

Prepared according to the general procedure A employing Ir[dF(CF<sub>3</sub>)ppy]<sub>2</sub>(dtbbpy)PF<sub>6</sub> (3.6 mg, 0.003 mmol), dtbbpy (**L1**) (20.9 mg, 0.078 mmol), Na<sub>2</sub>HPO<sub>4</sub> (63.9 mg, 0.45 mmol), NH<sub>4</sub>Cl (16.3 mg, 0.3 mmol), NiBr<sub>2</sub>·DME (18.5 mg, 0.06 mmol), *M*-fluorophenylpropionic acid (50.4 mg, 0.3 mmol), DMDC (60.3 mg, 48 μL, 0.45 mmol), a teflon stir bar, cyclohexene (49.3 mg, 61 μL, 0.6 mmol) and *i*PrOAc (6 mL). After 12 h, the reaction mixture was then passed through a short pad of silica gel using EtOAc/PE (1/5) as the eluent (~25 mL). The resulting mixture was concentrated, and the residue was purified by flash chromatography (PE/EA = 10/1) on silica gel to afford **18** (44.6 mg, 0.192 mmol, 64% yield) as a colorless liquid.

**<sup>1</sup>H NMR** (300 MHz, CDCl<sub>3</sub>) δ 7.25 – 7.16 (m, 1H), 6.99 – 6.83 (m, 3H), 5.90 – 5.83 (m, 1H), 5.73 – 5.68 (m, 1H), 3.11 – 3.04 (m, 1H), 2.94 – 2.86 (m, 2H), 2.82 – 2.76 (m, 2H), 2.04 – 1.97 (m, 2H), 1.84 – 1.65 (m, 3H), 1.63 – 1.57 (m, 1H).

**<sup>13</sup>C NMR** (126 MHz, CDCl<sub>3</sub>) δ 210.7, 163.0 (d, *J* = 245.4 Hz), 144.0, 130.5, 130.0 (d, *J* = 8.4 Hz), 124.2 (d, *J* = 2.8 Hz), 124.0, 115.4 (d, *J* = 21.0 Hz), 113.1 (d, *J* = 21.1 Hz), 49.2, 41.9, 29.6, 24.9, 24.8, 20.9.

**<sup>19</sup>F NMR** (471 MHz, CDCl<sub>3</sub>) δ -113.6.

**HRMS** (ESI) calcd for C<sub>15</sub>H<sub>17</sub>FNaO<sup>+</sup> [(M+Na)<sup>+</sup>]: calculated 255.1156, found 255.1148.

### Methyl 4-(3-(cyclohex-2-en-1-yl)-3-oxopropyl)benzoate (**19**)

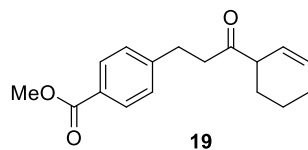

Prepared according to the general procedure A employing Ir[dF(CF<sub>3</sub>)ppy]<sub>2</sub>(dtbbpy)PF<sub>6</sub> (3.6 mg, 0.003 mmol), dtbbpy (**L1**) (20.9 mg, 0.078 mmol), Na<sub>2</sub>HPO<sub>4</sub> (63.9 mg, 0.45 mmol), NH<sub>4</sub>Cl (160.4 mg, 0.3 mmol), NiBr<sub>2</sub>·DME (18.5 mg, 0.06 mmol), 3-(4-(methoxycarbonyl)phenyl)propanoic acid (62.4 mg, 0.3 mmol), DMDC (60.3 mg, 48 μL, 0.45 mmol), a teflon stir bar, cyclohexene (49.3 mg, 61 μL, 0.6 mmol) and *i*PrOAc (6 mL). After 12 h, the reaction mixture was then passed through a short pad of silica gel using EtOAc/PE (1/5) as the eluent (~25 mL). The resulting mixture was concentrated, and the residue was purified by flash chromatography (PE/EA = 10/1) on silica gel to afford **19** (54.1 mg, 0.189 mmol, 63% yield) as a colorless liquid.

**<sup>1</sup>H NMR** (300 MHz, CDCl<sub>3</sub>) δ 7.94 (d, *J* = 8.4 Hz, 2H), 7.25 (d, *J* = 7.8 Hz, 2H), 5.99 – 5.78 (m, 1H), 5.77 – 5.59 (m, 1H), 3.90 (s, 3H), 3.11 – 3.03 (m, 1H), 2.99 – 2.91 (m, 2H), 2.87 – 2.74 (m, 2H), 2.05 – 1.95 (m, 2H), 1.82 – 1.66 (m, 3H), 1.59 – 1.49 (m, 1H).

**<sup>13</sup>C NMR** (126 MHz, CDCl<sub>3</sub>) δ 210.6, 167.2, 147.0, 130.5, 130.0, 129.9, 128.6, 128.2, 123.9, 52.2, 49.2, 41.8, 29.9, 24.9, 24.8, 20.9.

**HRMS** (ESI) calcd for C<sub>17</sub>H<sub>21</sub>O<sub>3</sub><sup>+</sup> [(M+H)<sup>+</sup>]: calculated 273.1458, found 273.1449.

### 1-(Cyclohex-2-en-1-yl)-6-phenylhexane-1,6-dione (**20**)

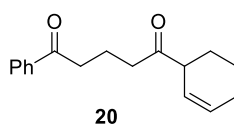

Prepared according to the general procedure A employing Ir[dF(CF<sub>3</sub>)ppy]<sub>2</sub>(dtbbpy)PF<sub>6</sub> (3.6 mg, 0.003 mmol), dtbbpy (**L1**) (20.9 mg, 0.078 mmol), Na<sub>2</sub>HPO<sub>4</sub> (63.9 mg, 0.45 mmol), NH<sub>4</sub>Cl (16.1 mg, 0.3 mmol), NiBr<sub>2</sub>·DME (18.5 mg, 0.06 mmol), 5-oxo-5-phenylpentanoic acid (57.6 mg, 0.3 mmol), DMDC (60.3 mg, 48 μL, 0.45 mmol), a teflon stir bar, cyclohexene (49.3 mg, 61 μL, 0.6 mmol) and *i*PrOAc (6 mL). After 12 h, the reaction mixture was then passed through a short pad of silica gel using EtOAc/PE (1/5) as the eluent (~25 mL). The resulting mixture was concentrated, and the residue was purified by flash chromatography (PE/EA = 10/1) on silica gel to afford **20** (46.1 mg, 0.18 mmol, 60% yield) as a colorless liquid.

**<sup>1</sup>H NMR** (300 MHz, CDCl<sub>3</sub>) δ 7.98 – 7.94 (m, 2H), 7.59 – 7.52 (m, 1H), 7.49 – 7.41 (m, 2H), 5.98 – 5.81 (m, 1H), 5.75 – 5.71 (m, 1H), 3.16 – 3.06 (m, 1H), 3.01 (t, *J* = 7.2 Hz, 2H), 2.62 (t, *J* = 7.2 Hz, 2H), 2.07 – 1.97 (m, 4H), 1.86 – 1.69 (m, 3H), 1.61 – 1.53 (m, 1H).

**<sup>13</sup>C NMR** (126 MHz, CDCl<sub>3</sub>) δ 211.8, 200.1, 137.0, 133.2, 130.3, 128.7, 128.2, 124.2, 49.1, 39.6, 37.7, 25.0, 24.9, 21.0, 18.5.

**HRMS** (ESI) calcd for C<sub>17</sub>H<sub>20</sub>O<sub>2</sub>Na<sup>+</sup> [(M+Na)<sup>+</sup>]: calculated 293.1512, found 293.1519.

#### 1-(Cyclohex-2-en-1-yl)-3-(naphthalen-2-yl)propan-1-one(**21**)

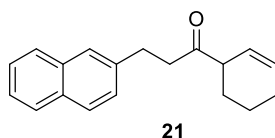

Prepared according to the general procedure A employing Ir[dF(CF<sub>3</sub>)ppy]<sub>2</sub>(dtbbpy)PF<sub>6</sub> (3.6 mg, 0.003 mmol), dtbbpy (**L1**) (20.9 mg, 0.078 mmol), Na<sub>2</sub>HPO<sub>4</sub> (63.9 mg, 0.45 mmol), NH<sub>4</sub>Cl (16mg, 0.3 mmol), NiBr<sub>2</sub>·DME (18.5 mg, 0.06 mmol), 3-(2-naphthyl)propanoic acid (60.3 mg, 0.3 mmol), DMDC (60.3 mg, 48 μL, 0.45 mmol), a teflon stir bar, cyclohexene (49.3 mg, 61 μL, 0.6 mmol) and *i*PrOAc (6 mL). After 12 h, the reaction mixture was then passed through a short pad of silica gel using EtOAc/PE (1/5) as the eluent (~25 mL). The resulting mixture was concentrated, and the residue was purified by flash chromatography (PE/EA = 10/1) on silica gel to afford **21** (49.1 mg, 0.186 mmol, 62% yield) as a colorless liquid.

**<sup>1</sup>H NMR** (300 MHz, CDCl<sub>3</sub>) δ 8.00 (d, *J* = 8.1 Hz, 1H), 7.86 (d, *J* = 7.4 Hz, 1H), 7.72 (d, *J* = 8.0 Hz, 1H), 7.58 – 7.44 (m, 2H), 7.43 – 7.30 (m, 2H), 5.97 – 5.79 (m, 1H), 5.76 – 5.60 (m, 1H), 3.44 – 3.30 (t, *J* = 6.6 Hz, 2H), 3.12 – 3.06 (m, 1H), 2.92 (t, *J* = 8.1 Hz, 2H), 2.08 – 1.91 (m, 2H), 1.84 – 1.65 (m, 3H), 1.56 – 1.49 (m, 1H).

**<sup>13</sup>C NMR** (126 MHz, CDCl<sub>3</sub>) δ 211.2, 137.5, 134.0, 131.8, 130.4, 129.0, 127.1, 126.24, 126.17, 125.75, 125.70, 124.1, 123.6, 49.3, 41.7, 27.1, 24.92, 24.86, 20.9.

**HRMS** (ESI) calcd for C<sub>19</sub>H<sub>20</sub>ONa<sup>+</sup> [(M+Na)<sup>+</sup>]: calculated 287.1406, found 287.1403.

#### 1-(Cyclohex-2-en-1-yl)-3-(furan-2-yl)propan-1-one (**22**)

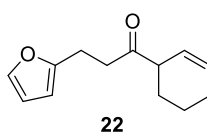

Prepared according to the general procedure A employing Ir[dF(CF<sub>3</sub>)ppy]<sub>2</sub>(dtbbpy)PF<sub>6</sub> (3.6 mg, 0.003 mmol), dtbbpy (**L1**) (20.9 mg, 0.078 mmol), Na<sub>2</sub>HPO<sub>4</sub> (63.9 mg, 0.45 mmol), NH<sub>4</sub>Cl (16.2 mg, 0.3 mmol), NiBr<sub>2</sub>·DME (18.5 mg, 0.06 mmol), 3-(2-furyl)propanoic acid (42.0 mg, 0.3 mmol), DMDC (60.3 mg, 48 μL, 0.45 mmol), a teflon stir bar, cyclohexene (49.3 mg, 61 μL, 0.6 mmol) and *i*PrOAc (6 mL). After 12 h, the reaction mixture was then passed through a short pad of silica gel using EtOAc/PE (1/5) as the eluent (~25 mL). The resulting mixture was concentrated, and the residue was purified by flash chromatography (PE/EA = 10/1) on silica gel to afford **22** (37.9 mg, 0.186 mmol, 62% yield) as a colorless liquid.

**<sup>1</sup>H NMR** (300 MHz, CDCl<sub>3</sub>) δ 7.28 (dd, *J* = 1.2 Hz, 0.6 Hz, 1H), 6.27 – 6.25 (m, 1H), 6.01 – 5.97 (m, 1H), 5.95 – 5.85 (m, 1H), 5.80 – 5.70 (m, 1H), 3.17 – 3.09 (m, 1H), 2.94 – 2.89 (m, 2H), 2.89 – 2.75 (m, 2H), 2.05 (d, *J* = 8.7 Hz, 2H), 1.88 – 1.69 (m, 3H), 1.59 – 1.51 (m, 1H).

**<sup>13</sup>C NMR** (126 MHz, CDCl<sub>3</sub>) δ 210.6, 154.9, 141.2, 130.4, 124.0, 110.3, 105.3, 49.1, 38.9, 24.90, 24.86, 22.4, 20.9.

**HRMS** (ESI) calcd for C<sub>13</sub>H<sub>16</sub>O<sub>2</sub>Na<sup>+</sup> [(M+Na)<sup>+</sup>]: calculated 241.1199, found 241.1196.

#### 1-(Cyclohex-2-en-1-yl)-4-(thiophen-2-yl)butan-1-one (**23**)

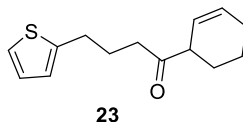

Prepared according to the general procedure A employing Ir[dF(CF<sub>3</sub>)ppy]<sub>2</sub>(dtbbpy)PF<sub>6</sub> (3.6 mg, 0.003 mmol), dtbbpy (**L1**) (20.9 mg, 0.078 mmol), Na<sub>2</sub>HPO<sub>4</sub> (63.9 mg, 0.45 mmol), NH<sub>4</sub>Cl (16.3 mg, 0.3 mmol), NiBr<sub>2</sub>·DME (18.5mg, 0.06 mmol), 4-(2-thienyl)butyric acid (51.0 mg, 0.3 mmol), DMDC (60.3 mg, 48 μL, 0.45 mmol), a teflon stir bar, cyclohexene (49.3 mg, 61 μL, 0.6 mmol) and *i*PrOAc (6 mL). After 12 h, the reaction mixture was then passed through a short pad of silica gel using EtOAc/PE (1/5) as the eluent (~25 mL). The resulting mixture was concentrated, and the residue was purified by flash chromatography (PE/EA = 10/1) on silica gel to afford **23** (34.2 mg, 0.201 mmol, 67% yield) as a colorless liquid.

**<sup>1</sup>H NMR** (300 MHz, CDCl<sub>3</sub>) δ 7.12 (dd, *J* = 5.1 Hz, 1.2 Hz, 1H), 6.93 – 6.90 (m, 1H), 6.79 – 6.77 (m, 1H), 5.90 – 5.83 (m, 1H), 5.74 – 5.68 (m, 1H), 3.12 – 3.06 (m, 1H), 2.85 (t, *J* = 7.5 Hz, 2H), 2.53 (t, *J* = 7.2 Hz, 2H), 2.05 – 1.93 (m, 4H), 1.82 – 1.69 (m, 3H), 1.62 – 1.54 (m, 1H).

<sup>13</sup>C NMR (126 MHz, CDCl<sub>3</sub>) δ 211.6, 144.6, 130.3, 126.9, 124.6, 124.2, 123.3, 49.1, 39.5, 29.3, 25.7, 25.0, 24.9, 21.0.

HRMS (ESI) calcd for C<sub>14</sub>H<sub>18</sub>OSNa<sup>+</sup> [(M+Na)<sup>+</sup>]: calculated 234.1078, found 234.1081.

***Tert*-butyl 3-(3-(cyclohex-2-en-1-yl)-3-oxopropyl)-1H-indole-1-carboxylate (**24**)**

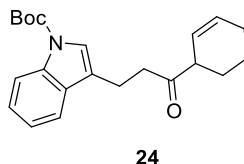

Prepared according to the general procedure A employing Ir[dF(CF<sub>3</sub>)ppy]<sub>2</sub>(dtbbpy)PF<sub>6</sub> (3.6 mg, 0.003 mmol), dtbbpy (**L1**) (20.9 mg, 0.078 mmol), Na<sub>2</sub>HPO<sub>4</sub> (63.9 mg, 0.45 mmol), NH<sub>4</sub>Cl (16.3 mg, 0.3 mmol), NiBr<sub>2</sub>·DME (18.5 mg, 0.06 mmol), 3-{1-[(*tert*-butoxy)carbonyl]-1H-indol-3-yl}propanoic acid (86.7 mg, 0.3 mmol), DMDC (60.3 mg, 48 μL, 0.45 mmol), a teflon stir bar, cyclohexene (49.3 mg, 61 μL, 0.6 mmol) and *i*PrOAc (6 mL). After 12 h, the reaction mixture was then passed through a short pad of silica gel using EtOAc/PE (1/5) as the eluent (~25 mL). The resulting mixture was concentrated, and the residue was purified by flash chromatography (PE/EA = 10/1) on silica gel to afford **24** (70.9 mg, 0.201 mmol, 67% yield) as a colorless liquid.

<sup>1</sup>H NMR (500 MHz, CDCl<sub>3</sub>) δ 8.12 (s, 1H), 7.52 (d, *J* = 7.5 Hz, 1H), 7.38 – 7.28 (m, 2H), 7.26 – 7.21 (m, 1H), 5.99 – 5.81 (m, 1H), 5.78 – 5.69 (m, 1H), 3.15 – 3.08 (m, 1H), 3.00 – 2.95 (m, 2H), 2.92 – 2.83 (m, 2H), 2.04 – 1.98 (m, 2H), 1.84 – 1.70 (m, 3H), 1.66 (s, 9H), 1.60 – 1.54 (m, 1H).

<sup>13</sup>C NMR (126 MHz, CDCl<sub>3</sub>) δ 211.1, 149.9, 135.7, 130.5, 130.4, 124.5, 124.1, 122.6, 122.5, 120.13, 119.0, 115.4, 83.6, 49.2, 40.2, 28.4, 24.91, 24.89, 20.9, 19.1.

HRMS (ESI) calcd for C<sub>22</sub>H<sub>27</sub>NO<sub>3</sub>Na<sup>+</sup> [(M+Na)<sup>+</sup>]: calculated 376.1883, found 376.1875.

**1-(Cyclohex-2-en-1-yl)-3,3-diphenylpropan-1-one (**25**)**

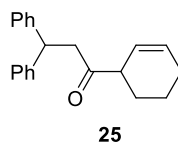

Prepared according to the general procedure A employing Ir[dF(CF<sub>3</sub>)ppy]<sub>2</sub>(dtbbpy)PF<sub>6</sub> (3.6 mg, 0.003 mmol), dtbbpy (**L1**) (20.9 mg, 0.078 mmol), Na<sub>2</sub>HPO<sub>4</sub> (63.9 mg, 0.45 mmol), NH<sub>4</sub>Cl (16.2 mg, 0.3 mmol), NiBr<sub>2</sub>·DME (18.5 mg, 0.06 mmol), 3,3-diphenylpropionic acid (67.8 mg, 0.3 mmol),

DMDC (60.3 mg, 48  $\mu$ L, 0.45 mmol), a teflon stir bar, cyclohexene (49.3 mg, 61  $\mu$ L, 0.6 mmol) and *i*PrOAc (6 mL). After 12 h, the reaction mixture was then passed through a short pad of silica gel using EtOAc/PE (1/5) as the eluent (~25 mL). The resulting mixture was concentrated, and the residue was purified by flash chromatography (PE/EA = 10/1) on silica gel to afford **25** (34.8 mg, 0.12 mmol, 40% yield) as a colorless liquid.

**$^1\text{H}$  NMR** (300 MHz,  $\text{CDCl}_3$ )  $\delta$  7.29 – 7.16 (m, 10H), 5.95 – 5.76 (m, 1H), 5.71 – 5.56 (m, 1H), 4.65 (t,  $J$  = 7.5 Hz, 1H), 3.32 – 3.14 (m, 2H), 3.05 – 2.95 (m, 1H), 2.02 – 1.92 (m, 2H), 1.76 – 1.59 (m, 3H), 1.55 – 1.46 (m, 1H).

**$^{13}\text{C}$  NMR** (126 MHz,  $\text{CDCl}_3$ )  $\delta$  209.8, 144.2, 130.4, 128.7, 128.0, 127.9, 126.5, 123.9, 49.5, 46.9, 45.9, 24.9, 24.6, 20.9.

**HRMS** (ESI) calcd for  $\text{C}_{21}\text{H}_{22}\text{ONa}^+$  [(M+Na) $^+$ ]: calculated 313.1563, found 313.1558.

***Tert*-butyl (4-(2-(cyclohex-2-en-1-yl)-2-oxoethyl)cyclohexyl)carbamate (**26**)**

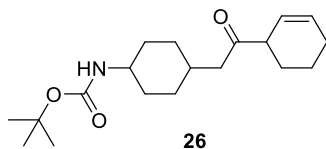

Prepared according to the general procedure A employing  $\text{Ir}[\text{dF}(\text{CF}_3)\text{ppy}]_2(\text{dtbbpy})\text{PF}_6$  (3.6 mg, 0.003 mmol), dtbbpy (**L1**) (20.9 mg, 0.078 mmol),  $\text{Na}_2\text{HPO}_4$  (63.9 mg, 0.45 mmol),  $\text{NH}_4\text{Cl}$  (16.2 mg, 0.3 mmol),  $\text{NiBr}_2 \cdot \text{DME}$  (18.5 mg, 0.06 mmol), 4-(*boc*-amino)cyclohexane acetic acid (77.2 mg, 0.3 mmol), DMDC (60.3 mg, 48  $\mu$ L, 0.45 mmol), a teflon stir bar, cyclohexene (49.3 mg, 61  $\mu$ L, 0.6 mmol) and *i*PrOAc (6 mL). After 12 h, the reaction mixture was then passed through a short pad of silica gel using EtOAc/PE (1/5) as the eluent (~25 mL). The resulting mixture was concentrated, and the residue was purified by flash chromatography (PE/EA = 10/1) on silica gel to afford **26** (38.5 mg, 0.12 mmol, 40% yield, *dr* 7.3/1) as a colorless liquid.

**$^1\text{H}$  NMR** (300 MHz,  $\text{CDCl}_3$ )  $\delta$  5.99 – 5.80 (m, 1H), 5.75 – 5.54 (m, 1H), 4.60 (s, 1H), 3.71 (s, 1H), 3.17 – 2.94 (m, 1H), 2.60 (d,  $J$  = 6.9 Hz, 0.24H), 2.40 (d,  $J$  = 6.9 Hz, 1.76H), 2.04 – 1.99 (m, 2H), 1.82 – 1.72 (m, 2H), 1.71 – 1.49 (m, 9H), 1.44 (s, 9H), 1.25 – 1.15 (m, 2H).

**$^{13}\text{C}$  NMR** (126 MHz,  $\text{CDCl}_3$ )  $\delta$  211.4, 130.4, 124.1, 60.6, 58.6, 49.6, 29.8, 28.6, 24.9, 24.9, 21.2, 21.0, 18.6, 14.3.

**HRMS** (ESI) calcd for  $\text{C}_{19}\text{H}_{31}\text{NO}_3\text{Na}^+$  [(M+Na) $^+$ ]: calculated 344.2196, found 344.2192.

***Tert*-butyl (7-(cyclohex-2-en-1-yl)-7-oxoheptyl)carbamate (27)**

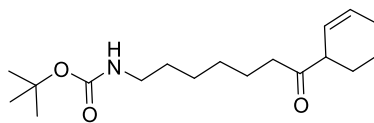

**27**

Prepared according to the general procedure A employing Ir[dF(CF<sub>3</sub>)ppy]<sub>2</sub>(dtbbpy)PF<sub>6</sub> (3.6 mg, 0.003 mmol), dtbbpy (**L1**) (20.9 mg, 0.078 mmol), Na<sub>2</sub>HPO<sub>4</sub> (63.9 mg, 0.45 mmol), NH<sub>4</sub>Cl (16.2 mg, 0.3 mmol), NiBr<sub>2</sub>·DME (18.5 mg, 0.06 mmol), Boc-7-aminoheptanoic acid (73.6 mg, 0.3 mmol), DMDC (60.3 mg, 48 μL, 0.45 mmol), a teflon stir bar, cyclohexene (49.3 mg, 61 μL, 0.6 mmol) and *i*PrOAc (6 mL). After 12 h, the reaction mixture was then passed through a short pad of silica gel using EtOAc/PE (1/5) as the eluent (~25 mL). The resulting mixture was concentrated, and the residue was purified by flash chromatography (PE/EA = 10/1) on silica gel to afford **27** (32.4 mg, 0.105 mmol, 35% yield) as a colorless liquid.

**<sup>1</sup>H NMR** (300 MHz, CDCl<sub>3</sub>) δ 5.88 – 5.82 (m, 1H), 5.74 – 5.67 (m, 1H), 4.53 (s, 1H), 3.11 – 3.04 (m, 3H), 2.45 (t, *J* = 7.3 Hz, 2H), 2.03 – 1.96 (m, 2H), 1.92 – 1.63 (m, 4H), 1.63 – 1.47 (m, 4H), 1.42 (s, 9H), 1.32 – 1.25 (m, 4H).

**<sup>13</sup>C NMR** (126 MHz, CDCl<sub>3</sub>) δ 212.2, 156.1, 130.1, 124.3, 79.1, 49.0, 40.6, 40.5, 30.0, 29.0, 28.5, 26.7, 24.9, 24.9, 23.7, 20.9.

**HRMS** (ESI) calcd for C<sub>18</sub>H<sub>31</sub>NO<sub>3</sub>Na<sup>+</sup> [(M+Na)<sup>+</sup>]: calculated 332.2196, found 332.2191.

**Ethyl 6-(cyclohex-2-en-1-yl)-6-oxohexanoate (28)**

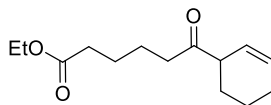

**28**

Prepared according to the general procedure A employing Ir[dF(CF<sub>3</sub>)ppy]<sub>2</sub>(dtbbpy)PF<sub>6</sub> (3.6 mg, 0.003 mmol), dtbbpy (**L1**) (20.9 mg, 0.078 mmol), Na<sub>2</sub>HPO<sub>4</sub> (63.9 mg, 0.45 mmol), NH<sub>4</sub>Cl (16.2 mg, 0.3 mmol), NiBr<sub>2</sub>·DME (18.5 mg, 0.06 mmol), Monoethyl adipate (53 μL, 0.3 mmol), DMDC (60.3 mg, 48 μL, 0.45 mmol), a teflon stir bar, cyclohexene (49.3 mg, 61 μL, 0.6 mmol) and *i*PrOAc (6 mL). After 12 h, the reaction mixture was then passed through a short pad of silica gel using EtOAc/PE (1/5) as the eluent (~25 mL). The resulting mixture was concentrated, and the residue



was purified by flash chromatography (PE/EA = 10/1) on silica gel to afford **28** (30.7 mg, 0.129 mmol, 43% yield) as a colorless liquid.

**<sup>1</sup>H NMR** (300 MHz, CDCl<sub>3</sub>) δ 5.91 – 5.84 (m, 1H), 5.75 – 5.69 (m, 1H), 4.12 (q, *J* = 7.1 Hz, 2H), 3.14 – 3.05 (m, 1H), 2.52 – 2.47 (m, 2H), 2.33 – 2.28 (m, 2H), 2.08 – 1.93 (m, 2H), 1.87 – 1.67 (m, 3H), 1.66 – 1.58 (m, 5H), 1.25 (t, *J* = 7.1 Hz, 3H).

**<sup>13</sup>C NMR** (126 MHz, CDCl<sub>3</sub>) δ 211.7, 173.6, 130.3, 124.2, 60.4, 49.1, 40.2, 34.3, 24.9, 24.9, 24.7, 23.4, 21.0, 14.4.

**HRMS** (ESI) calcd for C<sub>14</sub>H<sub>23</sub>O<sub>3</sub><sup>+</sup> [(M+H)<sup>+</sup>]: calculated 239.1642, found 245.1649.

#### ***Tert*-butyl 4-(cyclohex-2-en-1-yl)-4-oxobutanoate (**29**)**

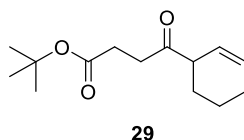

Prepared according to the general procedure A employing Ir[dF(CF<sub>3</sub>)ppy]<sub>2</sub>(dtbbpy)PF<sub>6</sub> (3.6 mg, 0.003 mmol), dtbbpy (**L1**) (20.9 mg, 0.078 mmol), Na<sub>2</sub>HPO<sub>4</sub> (63.9 mg, 0.45 mmol), NH<sub>4</sub>Cl (16.2 mg, 0.3 mmol), NiBr<sub>2</sub>·DME (18.5 mg, 0.06 mmol), 4-*tert*-butoxy-4-oxobutanoic acid (52 mg, 0.3 mmol), DMDC (60.3 mg, 48 μL, 0.45 mmol), a teflon stir bar, cyclohexene (49.3 mg, 61 μL, 0.6 mmol) and *i*PrOAc (6 mL). After 12 h, the reaction mixture was then passed through a short pad of silica gel using EtOAc/PE (1/5) as the eluent (~25 mL). The resulting mixture was concentrated, and the residue was purified by flash chromatography (PE/EA = 10/1) on silica gel to afford **29** (42.8 mg, 0.18 mmol, 60% yield) as a colorless liquid.

**<sup>1</sup>H NMR** (300 MHz, CDCl<sub>3</sub>) δ 6.02 – 5.81 (m, 1H), 5.79 – 5.73 (m, 1H), 3.18 – 3.10 (m, 1H), 2.80 – 2.69 (m, 2H), 2.53 – 2.46 (m, 2H), 2.05 – 1.97 (m, 2H), 1.88 – 1.69 (m, 3H), 1.60 – 1.52 (m, 1H), 1.43 (s, 9H).

**<sup>13</sup>C NMR** (126 MHz, CDCl<sub>3</sub>) δ 210.3, 172.2, 130.3, 124.2, 80.7, 48.9, 35.4, 29.4, 28.2, 25.0, 24.9, 21.0.

**HRMS** (ESI) calcd for C<sub>14</sub>H<sub>22</sub>O<sub>3</sub>Na<sup>+</sup> [(M+Na)<sup>+</sup>]: calculated 261.1461, found 261.1458.

#### **1-(Cyclohex-2-en-1-yl)-2-cyclopentylethan-1-one (**30**)**

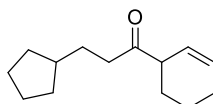

**30**

Prepared according to the general procedure A employing Ir[dF(CF<sub>3</sub>)ppy]<sub>2</sub>(dtbbpy)PF<sub>6</sub> (3.6 mg, 0.003 mmol), dtbbpy (**L1**) (20.9 mg, 0.078 mmol), Na<sub>2</sub>HPO<sub>4</sub> (63.8 mg, 0.45 mmol), NH<sub>4</sub>Cl (16.3 mg, 0.3 mmol), NiBr<sub>2</sub>·DME (18.5 mg, 0.06 mmol), 3-cyclopentylpropionic acid (43 μL, 0.3 mmol), DMDC (60.3 mg, 48 μL, 0.45 mmol), a teflon stir bar, cyclohexene (49.3 mg, 61 μL, 0.6 mmol) and *i*PrOAc (6 mL). After 12 h, the reaction mixture was then passed through a short pad of silica gel using EtOAc/PE (1/5) as the eluent (~25 mL). The resulting mixture was concentrated, and the residue was purified by flash chromatography (PE) on silica gel to afford **30** (37.1 mg, 0.18 mmol, 60% yield) as a colorless liquid.

<sup>1</sup>H NMR (300 MHz, CDCl<sub>3</sub>) δ 5.90 – 5.83 (m, 1H), 5.75 – 5.70 (m, 1H), 3.15 – 3.05 (m, 1H), 2.50 (d, *J* = 7.6 Hz, 2H), 2.30 – 2.17 (m, 2H), 2.00 (d, *J* = 6.6 Hz, 2H), 1.87 – 1.74 (m, 6H), 1.65 – 1.57 (m, 5H), 1.08 – 1.03 (m, 2H).

<sup>13</sup>C NMR (126 MHz, CDCl<sub>3</sub>) δ 212.2, 130.1, 124.4, 49.5, 49.2, 47.0, 35.7, 35.6, 32.8, 25.1, 25.0, 21.0.

HRMS (ESI) calcd for C<sub>14</sub>H<sub>23</sub>O<sup>+</sup> [(M+H)<sup>+</sup>]: calculated 207.1743, found 207.1750.

#### 6-Chloro-1-(cyclohex-2-en-1-yl)hexan-1-one (**31**)

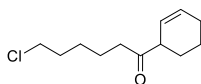

**31**

Prepared according to the general procedure A employing Ir[dF(CF<sub>3</sub>)ppy]<sub>2</sub>(dtbbpy)PF<sub>6</sub> (3.6 mg, 0.003 mmol), dtbbpy (**L1**) (20.9 mg, 0.078 mmol), Na<sub>2</sub>HPO<sub>4</sub> (63.9 mg, 0.45 mmol), NH<sub>4</sub>Cl (16.3 mg, 0.3 mmol), NiBr<sub>2</sub>·DME (18.5 mg, 0.06 mmol), 6-chlorohexanoic acid (45.1 mg, 0.3 mmol), DMDC (60.3 mg, 48 μL, 0.45 mmol), a teflon stir bar, cyclohexene (49.3 mg, 61 μL, 0.6 mmol) and *i*PrOAc (6 mL). After 12 h, the reaction mixture was then passed through a short pad of silica gel using EtOAc/PE (1/5) as the eluent (~25 mL). The resulting mixture was concentrated, and the residue was purified by flash chromatography (PE) on silica gel to afford **31** (39.1 mg, 0.183 mmol, 61% yield) as a colorless liquid.

**<sup>1</sup>H NMR** (300 MHz, CDCl<sub>3</sub>) δ 5.91 – 5.84 (m, 1H), 5.75 – 5.70 (m, 1H), 3.53 (t, *J* = 6.9 Hz, 2H), 3.13 – 3.06 (m, 1H), 2.50 (t, *J* = 7.5 Hz, 2H), 2.05 – 1.98 (m, 2H), 1.85 – 1.71 (m, 5H), 1.58 – 1.55 (m, 3H), 1.47 – 1.39 (m, 2H).

**<sup>13</sup>C NMR** (126 MHz, CDCl<sub>3</sub>) δ 211.9, 130.3, 124.2, 49.1, 45.0, 40.4, 32.6, 26.7, 25.0, 24.9, 23.1, 21.0.

**HRMS** (ESI) calcd for C<sub>12</sub>H<sub>19</sub>ClO<sub>2</sub>Na<sup>+</sup> [(M+Na)<sup>+</sup>]: calculated 237.1017, found 237.1011.

**(Z)-1-(cyclohex-2-en-1-yl)octadec-9-en-1-one (32)**

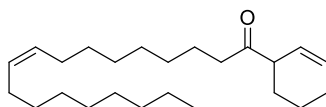

**32**

Prepared according to the general procedure A employing Ir[dF(CF<sub>3</sub>)ppy]<sub>2</sub>(dtbbpy)PF<sub>6</sub> (3.6 mg, 0.003 mmol), dtbbpy (**L1**) (20.9 mg, 0.078 mmol), Na<sub>2</sub>HPO<sub>4</sub> (63.9 mg, 0.45 mmol), NH<sub>4</sub>Cl (16.3 mg, 0.3 mmol), NiBr<sub>2</sub>·DME (18.5 mg, 0.06 mmol), Oleic acid (95 μL, 0.3 mmol), DMDC (60.3 mg, 48 μL, 0.45 mmol), a teflon stir bar, cyclohexene (49.3 mg, 61 μL, 0.6 mmol) and *i*PrOAc (6 mL). After 12 h, the reaction mixture was then passed through a short pad of silica gel using EtOAc/PE (1/5) as the eluent (~25 mL). The resulting mixture was concentrated, and the residue was purified by flash chromatography (PE) on silica gel to afford **32** (41.5 mg, 0.12 mmol, 40% yield) as a colorless liquid.

**<sup>1</sup>H NMR** (300 MHz, CDCl<sub>3</sub>) δ 5.93 – 5.81 (m, 1H), 5.77 – 5.69 (m, 1H), 5.39 – 5.33 (m, 2H), 3.15 – 3.05 (m, 1H), 2.46 (t, *J* = 7.4 Hz, 2H), 2.02 – 1.93 (m, 6H), 1.84 – 1.69 (m, 3H), 1.63 – 1.55 (m, 3H), 1.31 – 1.25 (m, 20H), 0.87 (m, 3H).

**<sup>13</sup>C NMR** (126 MHz, CDCl<sub>3</sub>) δ 212.3, 130.6, 130.4, 130.1, 124.4, 49.1, 40.7, 32.7, 32.7, 32.0, 29.9, 29.8, 29.7, 29.6, 29.5, 29.4, 29.3, 29.1, 27.4, 25.0, 24.0, 22.8, 21.0, 14.2.

**HRMS** (ESI) calcd for C<sub>24</sub>H<sub>42</sub>ONa<sup>+</sup> [(M+Na)<sup>+</sup>]: calculated 369.3128, found 369.3119.

**1-(Cyclohex-2-en-1-yl)octadecan-1-one (33)**

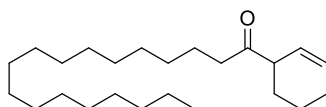

**33**

Prepared according to the general procedure A employing Ir[dF(CF<sub>3</sub>)ppy]<sub>2</sub>(dtbbpy)PF<sub>6</sub> (3.6 mg, 0.003 mmol), dtbbpy (**L1**) (20.9 mg, 0.078 mmol), Na<sub>2</sub>HPO<sub>4</sub> (63.9 mg, 0.45 mmol), NH<sub>4</sub>Cl (16.3 mg, 0.3 mmol), NiBr<sub>2</sub>·DME (18.5 mg, 0.06 mmol), Stearic acid (85.3 mg, 0.3 mmol), DMDC (60.3 mg, 48 μL, 0.45 mmol), a teflon stir bar, cyclohexene (49.3 mg, 61 μL, 0.6 mmol) and *i*PrOAc (6 mL). After 12 h, the reaction mixture was then passed through a short pad of silica gel using EtOAc/PE (1/5) as the eluent (~25 mL). The resulting mixture was concentrated, and the residue was purified by flash chromatography (PE) on silica gel to afford **33** (59.5 mg, 0.171 mmol, 57% yield) as a colorless liquid.

**<sup>1</sup>H NMR** (300 MHz, CDCl<sub>3</sub>) δ 5.91 – 5.83 (m, 1H), 5.77 – 5.69 (m, 1H), 3.15 – 3.05 (m, 1H), 2.46 (t, *J* = 7.4 Hz, 2H), 2.05 – 1.98 (m, 2H), 1.84 – 1.69 (m, 3H), 1.64 – 1.55 (m, 3H), 1.25 (m, 28H), 0.88 (s, 3H).

**<sup>13</sup>C NMR** (126 MHz, CDCl<sub>3</sub>) δ 212.4, 130.1, 124.4, 49.1, 40.8, 32.1, 29.85, 29.82, 29.81, 29.76, 29.64, 29.60, 29.51, 29.50, 24.96, 24.95, 24.0, 22.8, 21.0, 14.3.

**HRMS** (ESI) calcd for C<sub>24</sub>H<sub>45</sub>O<sup>+</sup> [(M+H)<sup>+</sup>]: calculated 349.3465, found 349.3457.

#### 1-(Cyclopent-2-en-1-yl)-4-(4-methoxyphenyl)butan-1-one (**34**)

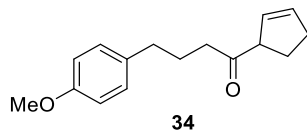

Prepared according to the general procedure A employing Ir[dF(CF<sub>3</sub>)ppy]<sub>2</sub>(dtbbpy)PF<sub>6</sub> (3.6 mg, 0.003 mmol), dtbbpy (**L1**) (20.9 mg, 0.078 mmol), Na<sub>2</sub>HPO<sub>4</sub> (63.9 mg, 0.45 mmol), NH<sub>4</sub>Cl (16.3 mg, 0.3 mmol), NiBr<sub>2</sub>·DME (18.5 mg, 0.06 mmol), 4-(4-methoxyphenyl)butyric acid (58.2 mg, 0.3 mmol), DMDC (60.3 mg, 48 μL, 0.45 mmol), a teflon stir bar, cyclopentene (40.9 mg, 53.0 μL, 0.6 mmol) and *i*PrOAc (6 mL). After 12 h, the reaction mixture was then passed through a short pad of silica gel using EtOAc/PE (1/5) as the eluent (~25 mL). The resulting mixture was concentrated, and the residue was purified by flash chromatography (PE/EA = 10/1) on silica gel to afford **34** (49.8 mg, 0.204 mmol, 68% yield) as a colorless liquid.

**<sup>1</sup>H NMR** (300 MHz, CDCl<sub>3</sub>) δ 7.08 (d, *J* = 8.7 Hz, 2H), 6.82 (d, *J* = 8.7 Hz, 2H), 6.00 – 5.84 (m, 1H), 5.75 – 5.63 (m, 1H), 3.79 (s, 3H), 3.61 – 3.54 (m, 1H), 2.59 – 2.53 (m, 2H), 2.49 – 2.31 (m, 4H), 2.10 – 2.00 (m, 2H), 1.93 – 1.83 (m, 2H).

$^{13}\text{C}$  NMR (126 MHz,  $\text{CDCl}_3$ )  $\delta$  211.6, 158.0, 134.4, 133.9, 129.5, 128.6, 113.9, 77.4, 58.9, 55.4, 40.1, 34.3, 32.4, 25.6, 25.5.

HRMS (ESI) calcd for  $\text{C}_{16}\text{H}_{21}\text{O}_2^+$  [(M+H) $^+$ ]: calculated 245.1536, found 245.1531.

**4-(4-Methoxyphenyl)-1-(6-methylcyclohex-2-en-1-yl)butan-1-one (35)**

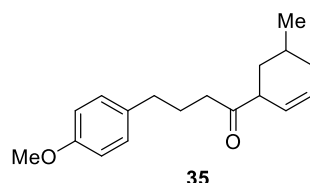

Prepared according to the general procedure A employing  $\text{Ir}[\text{dF}(\text{CF}_3)\text{ppy}]_2(\text{dtbbpy})\text{PF}_6$  (3.6 mg, 0.003 mmol), dtbbpy (**L1**) (20.9 mg, 0.078 mmol),  $\text{Na}_2\text{HPO}_4$  (63.9 mg, 0.45 mmol),  $\text{NH}_4\text{Cl}$  (16.3 mg, 0.3 mmol),  $\text{NiBr}_2 \cdot \text{DME}$  (18.5 mg, 0.06 mmol), 4-(4-methoxyphenyl)butyric acid (58.2 mg, 0.3 mmol), DMDC (60.3 mg, 48  $\mu\text{L}$ , 0.45 mmol), a teflon stir bar, 4-methyl-1-cyclohexene (57.7 mg, 73  $\mu\text{L}$ , 0.6 mmol) and *i*PrOAc (6 mL). After 12 h, the reaction mixture was then passed through a short pad of silica gel using EtOAc/PE (1/5) as the eluent (~25 mL). The resulting mixture was concentrated, and the residue was purified by flash chromatography (PE/EA = 10/1) on silica gel to afford **35** (50.6 mg, 0.186 mmol, 62% yield) as a colorless liquid. The obtained product is a mixture of regio-isomers and diastereoisomers (1.1/2.2/3.0/1.0).

$^1\text{H}$  NMR (500 MHz,  $\text{CDCl}_3$ )  $\delta$  7.11–7.06 (m, 2H), 6.82 (d,  $J$  = 8.5 Hz, 2H), 5.87–5.79 (m, 0.86H), 5.77–5.60 (m, 0.67H), 5.51–5.44 (m, 0.47H), 3.79 (s, 3H), 3.24–3.16 (m, 0.16H), 3.11–3.02 (m, 0.32H), 2.82–2.75 (m, 0.45H), 2.70–2.64 (m, 0.07H), 2.56 (t,  $J$  = 7.5 Hz, 2H), 2.52–2.38 (m, 2H), 2.12–2.04 (m, 1H), 2.02–1.93 (m, 1H), 1.92–1.83 (m, 2H), 1.75–1.66 (m, 1H), 1.38–1.21 (m, 1.67H), 1.08–1.04 (m, 0.33H), 1.00–0.91 (m, 3H).

$^{13}\text{C}$  NMR (126 MHz, Chloroform-*d*)  $\delta$  212.5, 211.5, 158.0, 133.9, 130.1, 129.9, 129.50, 129.48, 123.6, 123.5, 113.9, 57.9, 55.4, 50.9, 48.2, 40.3, 40.2, 34.39, 34.37, 33.4, 31.8, 29.8, 29.1, 25.7, 25.6, 25.5, 24.5, 21.6, 20.4.

HRMS (ESI) calcd for  $\text{C}_{18}\text{H}_{25}\text{O}_2^+$  [(M+H) $^+$ ]: calculated 273.1849, found 273.1844.

**1-(Cyclohept-2-en-1-yl)-4-(4-methoxyphenyl)butan-1-one (36)**

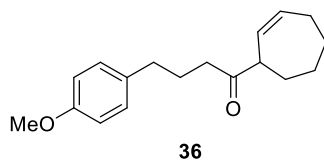

Prepared according to the general procedure A employing Ir[dF(CF<sub>3</sub>)ppy]<sub>2</sub>(dtbbpy)PF<sub>6</sub> (3.6 mg, 0.003 mmol), dtbbpy (**L1**) (20.9 mg, 0.078 mmol), Na<sub>2</sub>HPO<sub>4</sub> (63.9 mg, 0.45 mmol), NH<sub>4</sub>Cl (16.3 mg, 0.3 mmol), NiBr<sub>2</sub>·DME (18.5 mg, 0.06 mmol), 4-(4-methoxyphenyl)butyric acid (58.2 mg, 0.3 mmol), DMDC (60.3 mg, 48 μL, 0.45 mmol), a teflon stir bar, cycloheptene (57.7 mg, 70.0 μL, 0.6 mmol) and *i*PrOAc (6 mL). After 12 h, the reaction mixture was then passed through a short pad of silica gel using EtOAc/PE (1/5) as the eluent (~25 mL). The resulting mixture was concentrated, and the residue was purified by flash chromatography (PE/EA = 10/1) on silica gel to afford **36** (35.1 mg, 0.129 mmol, 43% yield) as a colorless liquid.

**<sup>1</sup>H NMR** (300 MHz, CDCl<sub>3</sub>) δ 7.09 (d, *J* = 8.7 Hz, 2H), 6.82 (d, *J* = 8.7 Hz, 2H), 5.97 – 5.86 (m, 1H), 5.83 – 5.73 (m, 1H), 3.79 (s, 3H), 3.33 – 3.20 (m, 1H), 2.56 (d, *J* = 7.2 Hz, 2H), 2.52 – 2.42 (m, 2H), 2.23 – 2.07 (m, 2H), 2.04 – 1.96 (m, 1H), 1.94 – 1.83 (m, 2H), 1.83 – 1.74 (m, 1H), 1.72 – 1.60 (m, 2H), 1.55 – 1.33 (m, 2H).

**<sup>13</sup>C NMR** (126 MHz, CDCl<sub>3</sub>) δ 212.1, 158.0, 133.9, 133.8, 130.0, 129.5, 113.9, 55.4, 53.4, 40.2, 34.4, 30.5, 29.6, 28.7, 26.6, 25.7.

**HRMS** (ESI) calcd for C<sub>18</sub>H<sub>25</sub>O<sub>2</sub><sup>+</sup> [(M+H)<sup>+</sup>]: calculated 273.1849, found 273.1839.

**(Z)-1-(cyclooct-2-en-1-yl)-4-(4-methoxyphenyl)butan-1-one (37)**

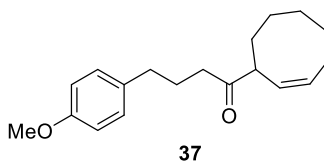

Prepared according to the general procedure A employing Ir[dF(CF<sub>3</sub>)ppy]<sub>2</sub>(dtbbpy)PF<sub>6</sub> (3.6 mg, 0.003 mmol), dtbbpy (**L1**) (20.9 mg, 0.078 mmol), Na<sub>2</sub>HPO<sub>4</sub> (63.9 mg, 0.45 mmol), NH<sub>4</sub>Cl (16.3 mg, 0.3 mmol), NiBr<sub>2</sub>·DME (18.5 mg, 0.06 mmol), 4-(4-methoxyphenyl)butyric acid (58.2 mg, 0.3 mmol), DMDC (60.3 mg, 48 μL, 0.45 mmol), a teflon stir bar, cyclooctene (66.1 mg, 78 μL, 0.6 mmol) and *i*PrOAc (6 mL). After 12 h, the reaction mixture was then passed through a short pad of silica gel using EtOAc/PE (1/5) as the eluent (~25 mL). The resulting mixture was concentrated, and the residue was purified by flash chromatography (PE/EA = 10/1) on silica gel to afford **37** (46.3 mg, 0.162 mmol, 54% yield) as a colorless liquid.

**<sup>1</sup>H NMR** (300 MHz, CDCl<sub>3</sub>) δ 7.09 (d, *J* = 8.7 Hz, 2H), 6.82 (d, *J* = 8.7 Hz, 2H), 5.85 – 5.72 (m, 1H), 5.60 – 5.50 (m, 1H), 3.79 (s, 3H), 3.54 – 3.41 (m, 1H), 2.55 (t, *J* = 7.5 Hz, 2H), 2.47 (t, *J* = 7.5 Hz, 2H), 2.24 – 2.05 (m, 2H), 1.93 – 1.81 (m, 2H), 1.73 – 1.63 (m, 2H), 1.59 – 1.49 (m, 2H), 1.46 – 1.24 (m, 4H).

**<sup>13</sup>C NMR** (126 MHz, CDCl<sub>3</sub>) δ 212.7, 158.0, 133.9, 131.9, 129.5, 127.8, 113.9, 55.4, 49.9, 41.0, 34.4, 32.1, 29.4, 26.8, 26.6, 25.6, 25.4.

**HRMS** (ESI) calcd for C<sub>19</sub>H<sub>26</sub>NaO<sub>2</sub><sup>+</sup> [(M+Na)<sup>+</sup>]: calculated 309.1825, found 309.1819.

**1-((2Z,6Z)-cycloocta-2,6-dien-1-yl)-4-(4-methoxyphenyl)butan-1-one (38)**

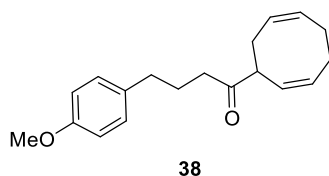

Prepared according to the general procedure A employing Ir[dF(CF<sub>3</sub>)ppy]<sub>2</sub>(dtbbpy)PF<sub>6</sub> (3.6 mg, 0.003 mmol), dtbbpy (**L1**) (20.9 mg, 0.078 mmol), Na<sub>2</sub>HPO<sub>4</sub> (63.9 mg, 0.45 mmol), NH<sub>4</sub>Cl (16.2 mg, 0.3 mmol), NiBr<sub>2</sub>·DME (18.5 mg, 0.06 mmol), 4-(4-methoxyphenyl)butyric acid (58.2 mg, 0.3 mmol), DMDC (60.3 mg, 48 μL, 0.45 mmol), a teflon stir bar, 1,5-cyclooctadiene (64.9 mg, 74 μL, 0.6 mmol) and *i*PrOAc (6 mL). After 12 h, the reaction mixture was then passed through a short pad of silica gel using EtOAc/PE (1/5) as the eluent (~25 mL). The resulting mixture was concentrated, and the residue was purified by flash chromatography (PE/EA = 10/1) on silica gel to afford **38** (42.6 mg, 0.15 mmol, 50% yield) as a colorless liquid.

**<sup>1</sup>H NMR** (300 MHz, CDCl<sub>3</sub>) δ 7.09 (d, *J* = 8.7 Hz, 2H), 6.83 (d, *J* = 8.7 Hz, 2H), 5.76 – 5.65 (m, 1H), 5.61 – 5.38 (m, 3H), 3.79 (s, 3H), 3.71 – 3.59 (m, 1H), 2.75 – 2.61 (m, 1H), 2.60 – 2.46 (m, 5H), 2.46 – 2.37 (m, 1H), 2.37 – 2.20 (m, 3H), 1.94 – 1.82 (m, 2H).

**<sup>13</sup>C NMR** (126 MHz, CDCl<sub>3</sub>) δ 210.9, 158.0, 133.8, 131.4, 129.47, 129.46, 127.0, 126.4, 113.9, 55.4, 52.7, 40.8, 34.3, 29.9, 28.0, 27.6, 25.6.

**HRMS** (ESI) calcd for C<sub>19</sub>H<sub>24</sub>O<sub>2</sub>Na<sup>+</sup> [(M+Na)<sup>+</sup>]: calculated 307.1669, found 307.1661.

**(Z)-1-(cyclododec-2-en-1-yl)-4-(4-methoxyphenyl)butan-1-one (39)**

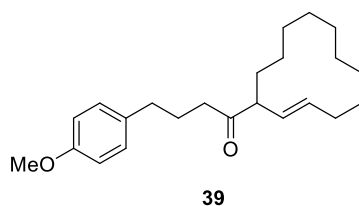

Prepared according to the general procedure A employing Ir[dF(CF<sub>3</sub>)ppy]<sub>2</sub>(dtbbpy)PF<sub>6</sub> (3.6 mg, 0.003 mmol), dtbbpy (**L1**) (20.9 mg, 0.078 mmol), Na<sub>2</sub>HPO<sub>4</sub> (63.9 mg, 0.45 mmol), NH<sub>4</sub>Cl (16.3 mg, 0.3 mmol), NiBr<sub>2</sub>·DME (18.5 mg, 0.06 mmol), 4-(4-methoxyphenyl)butyric acid (58.2 mg, 0.3 mmol), DMDC (60.3 mg, 48 μL, 0.45 mmol, 1.5 equiv), a teflon stir bar, 1-cyclododecene (99.8 mg, 115 μL, 0.6 mmol) and *i*PrOAc (6 mL). After 12 h, the reaction mixture was then passed through a short pad of silica gel using EtOAc/PE (1/5) as the eluent (~25 mL). The resulting mixture was concentrated, and the residue was purified by flash chromatography (PE/EA = 10/1) on silica gel to afford **39** (41.0 mg, 0.12 mmol, 40% yield) as a colorless liquid.

**<sup>1</sup>H NMR** (300 MHz, CDCl<sub>3</sub>) δ 7.07 (d, *J* = 8.6 Hz, 2H), 6.82 (d, *J* = 8.6 Hz, 2H), 5.59 – 5.47 (m, 1H), 5.35 – 5.26 (m, 1H), 3.78 (s, 3H), 3.06 – 2.98 (m, 1H), 2.55 – 2.50 (m, 2H), 2.47 – 2.39 (m, 2H), 2.26 – 2.16 (m, 1H), 1.92 – 1.79 (m, 3H), 1.51 – 1.43 (m, 3H), 1.36 – 1.19 (m, 13H).

**<sup>13</sup>C NMR** (126 MHz, CDCl<sub>3</sub>) δ 212.0, 157.9, 135.2, 133.9, 129.4, 128.7, 113.8, 56.9, 55.3, 48.9, 40.4, 34.3, 32.5, 28.6, 26.3, 25.9, 25.5, 25.0, 24.8, 24.7, 24.6, 24.3.

**HRMS** (ESI) calcd for C<sub>23</sub>H<sub>35</sub>O<sub>2</sub><sup>+</sup> [(M+H)<sup>+</sup>]: calculated 343.2632, found 343.2625.

**(*E*)-1-(4-methoxyphenyl)-5-methyloct-6-en-4-one (**40**)**

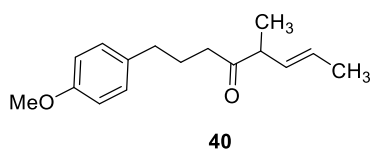

Prepared according to the general procedure A employing Ir[dF(CF<sub>3</sub>)ppy]<sub>2</sub>(dtbbpy)PF<sub>6</sub> (3.6 mg, 0.003 mmol), dtbbpy (**L1**) (20.9 mg, 0.078 mmol), Na<sub>2</sub>HPO<sub>4</sub> (63.9 mg, 0.45 mmol), NH<sub>4</sub>Cl (16.2 mg, 0.3 mmol), NiBr<sub>2</sub>·DME (18.5 mg, 0.06 mmol), 4-(4-methoxyphenyl)butyric acid (58.2 mg, 0.3 mmol), DMDC (60.3 mg, 48 μL, 0.45 mmol), a teflon stir bar, trans-2-pentene (42.1 mg, 65 μL, 0.6 mmol) and *i*PrOAc (6 mL). After 12 h, the reaction mixture was then passed through a short pad of silica gel using EtOAc/PE (1/5) as the eluent (~25 mL). The resulting mixture was concentrated, and the residue was purified by flash chromatography (PE/EA = 10/1) on silica gel to afford **40** (44.3 mg, 0.18 mmol, 60% yield, *E/Z* 6.1/1) as a colorless liquid.



**<sup>1</sup>H NMR** (500 MHz, CDCl<sub>3</sub>) δ 7.07 (d, *J* = 9.0 Hz, 2H), 6.82 (d, *J* = 8.5 Hz, 2H), 5.61 – 5.51 (m, 1H), 5.41 – 5.33 (m, 0.86H), 5.29 – 5.21 (m, 0.14H), 3.78 (s, 3H), 3.16 – 3.04 (m, 1H), 2.60 – 2.45 (m, 3H), 2.44 – 2.35 (m, 1H), 1.86 – 1.81 (m, 2H), 1.71 – 1.63 (m, 3H), 1.15 – 1.08 (m, 3H).

**<sup>13</sup>C NMR** (126 MHz, Chloroform-*d*) δ 212.1, 211.8, 157.9, 133.9, 130.4, 130.0, 129.4, 127.8, 126.5, 113.8, 55.3, 50.4, 45.3, 39.8, 34.3, 25.5, 18.1, 16.3, 13.2.

**HRMS** (ESI) calcd for C<sub>16</sub>H<sub>23</sub>O<sub>2</sub><sup>+</sup> [(M+H)<sup>+</sup>]: calculated 247.1693, found 274.1682

**(*E*)-1-(4-methoxyphenyl)-8-methylnon-6-en-4-one (41)**

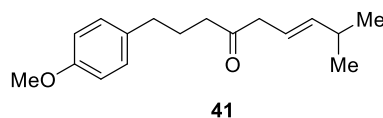

Prepared according to the general procedure A employing Ir[dF(CF<sub>3</sub>)ppy]<sub>2</sub>(dtbbpy)PF<sub>6</sub> (3.6 mg, 0.003 mmol), dtbbpy (L1) (20.9 mg, 0.078 mmol), Na<sub>2</sub>HPO<sub>4</sub> (63.9 mg, 0.45 mmol), NH<sub>4</sub>Cl (16.2 mg, 0.3 mmol), NiBr<sub>2</sub>·DME (18.5 mg, 0.06 mmol), 4-(4-methoxyphenyl)butyric acid (58.2 mg, 0.3 mmol), DMDC (60.3 mg, 48 μL, 0.45 mmol), a teflon stir bar, trans-4-methyl-2-pentene (50.5 mg, 74 μL, 0.6 mmol) and *i*PrOAc (6 mL). After 12 h, the reaction mixture was then passed through a short pad of silica gel using EtOAc/PE (1/5) as the eluent (~25 mL). The resulting mixture was concentrated, and the residue was purified by flash chromatography (PE/EA = 10/1) on silica gel to afford **41** (39.0 mg, 0.15 mmol, 50% yield, *E/Z* 7.7/1) as a colorless liquid.

**<sup>1</sup>H NMR** (300 MHz, CDCl<sub>3</sub>) δ 7.08 (d, *J* = 8.4 Hz, 2H), 6.82 (d, *J* = 8.7 Hz, 2H), 5.54 – 5.42 (m, 1.75H), 5.41 – 5.36 (m, 0.32H), 3.79 (s, 3H), 3.13 (d, *J* = 5.7 Hz, 0.23H), 3.05 (d, *J* = 5.4 Hz, 1.77H), 2.55 (t, *J* = 7.5 Hz, 2H), 2.42 (t, *J* = 7.2 Hz, 2H), 2.33 – 2.22 (m, 1H), 1.92 – 1.79 (m, 2H), 0.98 (s, 2.66H), 0.96 (s, 2.66H), 0.95 (s, 0.34H), 0.93 (s, 0.34H).

**<sup>13</sup>C NMR** (126 MHz, CDCl<sub>3</sub>) δ 209.6, 158.0, 142.3, 133.9, 129.5, 119.1, 113.9, 55.4, 47.0, 41.3, 34.3, 31.2, 25.5, 22.5.

**HRMS** (ESI) calcd for C<sub>17</sub>H<sub>25</sub>O<sub>2</sub><sup>+</sup> [(M+H)<sup>+</sup>]: calculated 261.1849, found 261.1844.

**(*E*)-7-(4-methoxyphenyl)-1-phenylhept-1-en-4-one (42)**

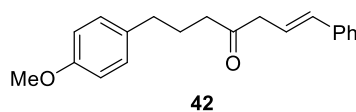

Prepared according to the general procedure A employing Ir[dF(CF<sub>3</sub>)ppy]<sub>2</sub>(dtbbpy)PF<sub>6</sub> (3.6 mg, 0.003 mmol), dtbbpy (L1) (20.9 mg, 0.078 mmol), Na<sub>2</sub>HPO<sub>4</sub> (63.9 mg, 0.45 mmol), NH<sub>4</sub>Cl (16.3

mg, 0.3 mmol), NiBr<sub>2</sub>·DME (18.5 mg, 0.06 mmol), 4-(4-methoxyphenyl)butyric acid (58.2 mg, 0.3 mmol), DMDC (60.3 mg, 48 μL, 0.45 mmol), a teflon stir bar, trans-β-methylstyrene (70.9 mg, 78 μL, 0.6 mmol) and *i*PrOAc (6 mL). After 12 h, the reaction mixture was then passed through a short pad of silica gel using EtOAc/PE (1/5) as the eluent (~25 mL). The resulting mixture was concentrated, and the residue was purified by flash chromatography (PE/EA = 10/1) on silica gel to afford **42** (47.6 mg, 0.162 mmol, 54% yield, *E/Z* 6.1/1) as a colorless liquid.

**<sup>1</sup>H NMR** (300 MHz, CDCl<sub>3</sub>) δ 7.39 – 7.29 (m, 4H), 7.25 – 7.19 (m, 1H), 7.07 (d, *J* = 8.7 Hz, 2H), 6.81 (d, *J* = 8.7 Hz, 2H), 6.45 (d, *J* = 15.9 Hz, 1H), 6.34 – 6.21 (m, 1H), 3.78 (s, 3H), 3.39 (dd, *J* = 7.2, 1.5 Hz, 0.28H), 3.28 (dd, *J* = 6.9, 0.9 Hz, 1.72H), 2.57 (t, *J* = 7.2 Hz, 2H), 2.49 (t, *J* = 7.2 Hz, 2H), 1.94 – 1.84 (m, 2H).

**<sup>13</sup>C NMR** (126 MHz, CDCl<sub>3</sub>) δ 208.7, 158.0, 137.1, 133.8, 133.7, 129.5, 128.7, 127.7, 126.4, 122.2, 114.0, 55.4, 47.2, 41.6, 34.2, 29.9, 25.5.

**HRMS** (ESI) calcd for C<sub>20</sub>H<sub>23</sub>O<sub>2</sub><sup>+</sup> [(M+H)<sup>+</sup>]: calculated 295.1693, found 295.1683.

**(*E*)-1-(4-methoxyphenyl)-6,8,8-trimethylnon-6-en-4-one (**43**)**

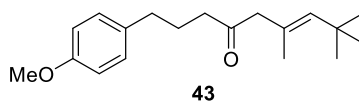

Prepared according to the general procedure A employing Ir[dF(CF<sub>3</sub>)ppy]<sub>2</sub>(dtbbpy)PF<sub>6</sub> (3.6 mg, 0.003 mmol), dtbbpy (**L1**) (20.9 mg, 0.078 mmol, 26%), Na<sub>2</sub>HPO<sub>4</sub> (63.9 mg, 0.45 mmol, 1.5 equiv), NH<sub>4</sub>Cl (16.3 mg, 0.3 mmol), NiBr<sub>2</sub>·DME (18.5 mg, 0.06 mmol), 4-(4-methoxyphenyl)butyric acid (58.2 mg, 0.3 mmol), DMDC (60.3 mg, 48 μL, 0.45 mmol), a teflon stir bar, 2,2,4-trimethyl-3-pentene (67.3 mg, 94 μL, 0.6 mmol) and *i*PrOAc (6 mL). After 12 h, the reaction mixture was then passed through a shortpad of silica gel using EtOAc/PE (1/5) as the eluent (~25 mL). The resulting mixture was concentrated, and the residue was purified by flash chromatography (PE/EA = 10/1) on silica gel to afford **43** (56.2 mg, 0.195 mmol, 65% yield, *E/Z* 13.3/1) as a colorless liquid.

**<sup>1</sup>H NMR** (300 MHz, CDCl<sub>3</sub>) δ 7.08 (d, *J* = 8.7 Hz, 2H), 6.82 (d, *J* = 8.7 Hz, 2H), 5.40 (s, 0.07H), 5.27 (q, *J* = 1.2 Hz, 0.93H), 3.78 (s, 3H), 3.26 (s, 0.14H), 2.94 (s, 1.86H), 2.54 (t, *J* = 7.5 Hz, 2H), 2.42 (t, *J* = 7.5 Hz, 2H), 1.90 – 1.80 (m, 2H), 1.70 (d, *J* = 1.5 Hz, 2.79H), 1.65 (d, *J* = 1.5 Hz, 0.21H), 1.10 (s, 9H).

<sup>13</sup>C NMR (126 MHz, CDCl<sub>3</sub>) δ 210.0, 158.0, 140.4, 133.9, 129.4, 128.1, 113.9, 56.3, 55.3, 40.5, 34.3, 32.5, 31.4, 30.9, 25.6, 17.7.

HRMS (ESI) calcd for C<sub>19</sub>H<sub>28</sub>O<sub>2</sub>Na<sup>+</sup> [(M+Na)<sup>+</sup>]: calculated 311.1982, found 311.1975.

#### 1-(4-Methoxyphenyl)-6,7-dimethyloct-6-en-4-one (44)

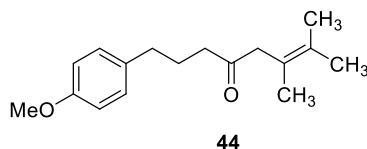

Prepared according to the general procedure A employing Ir[dF(CF<sub>3</sub>)ppy]<sub>2</sub>(dtbbpy)PF<sub>6</sub> (3.6 mg, 0.003 mmol), dtbbpy (**L1**) (20.9 mg, 0.078 mmol), Na<sub>2</sub>HPO<sub>4</sub> (63.9 mg, 0.45 mmol), NH<sub>4</sub>Cl (16.1 mg, 0.3 mmol), NiBr<sub>2</sub>·DME (18.5 mg, 0.06 mmol), 4-(4-methoxyphenyl)butyric acid (58.2 mg, 0.3 mmol), DMDC (60.3 mg, 48 μL, 0.45 mmol), a teflon stir bar, 2,3-dimethyl-2-butene (50.5 mg, 71 μL, 0.6 mmol) and *i*PrOAc (6 mL). After 12 h, the reaction mixture was then passed through a short pad of silica gel using EtOAc/PE (1/5) as the eluent (~25 mL). The resulting mixture was concentrated, and the residue was purified by flash chromatography (PE/EA = 10/1) on silica gel to afford **44** (47.6 mg, 0.183 mmol, 61% yield) as a colorless liquid.

<sup>1</sup>H NMR (300 MHz, CDCl<sub>3</sub>) δ 7.07 (d, *J* = 8.4 Hz, 2H), 6.82 (d, *J* = 8.7 Hz, 2H), 3.78 (s, 3H), 3.10 (s, 2H), 2.54 (t, *J* = 7.5 Hz, 2H), 2.39 (t, *J* = 7.2 Hz, 2H), 1.91 – 1.80 (m, 2H), 1.70 (s, 3H), 1.64 (s, 6H).

<sup>13</sup>C NMR (126 MHz, CDCl<sub>3</sub>) δ 209.6, 158.0, 133.9, 129.5, 128.6, 121.4, 113.9, 55.4, 49.3, 41.0, 34.3, 25.7, 20.9, 20.8, 19.4.

HRMS (ESI) calcd for C<sub>17</sub>H<sub>25</sub>O<sub>2</sub><sup>+</sup> [(M+H)<sup>+</sup>]: calculated 261.1849, found 261.1845.

#### 5-(4-Methoxyphenyl)-1-phenylpentan-2-one (45)

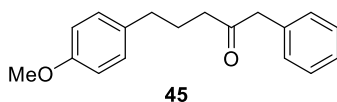

Prepared according to the general procedure A employing Ir[dF(CF<sub>3</sub>)ppy]<sub>2</sub>(dtbbpy)PF<sub>6</sub> (3.6 mg, 0.003 mmol), dtbbpy (**L1**) (20.9 mg, 0.078 mmol), Na<sub>2</sub>HPO<sub>4</sub> (63.9 mg, 0.45 mmol), NH<sub>4</sub>Cl (16.2 mg, 0.3 mmol), NiBr<sub>2</sub>·DME (18.5 mg, 0.06 mmol), 4-(4-methoxyphenyl)butyric acid (58.2 mg, 0.3 mmol), DMDC (60.3 mg, 48 μL, 0.45 mmol), a teflon stir bar, toluene (55.3 mg, 63 μL, 0.6 mmol) and *i*PrOAc (6 mL). After 12 h, the reaction mixture was then passed through a short pad of silica

gel using EtOAc/PE (1/5) as the eluent (~25 mL). The resulting mixture was concentrated, and the residue was purified by flash chromatography (PE/EA = 10/1) on silica gel to afford **45** (45.8 mg, 0.171 mmol, 57% yield) as a colorless liquid.

**<sup>1</sup>H NMR** (500 MHz, CDCl<sub>3</sub>) δ 7.32 (t, *J* = 7.0 Hz, 2H), 7.28 – 7.26 (m, 1H), 7.18 (d, *J* = 7.0 Hz, 2H), 7.01 (d, *J* = 8.5 Hz, 2H), 6.80 (d, *J* = 8.5 Hz, 2H), 3.78 (s, 3H), 3.65 (s, 2H), 2.50 (t, *J* = 7.5 Hz, 2H), 2.45 (t, *J* = 7.0 Hz, 2H), 1.87 – 1.82 (m, 2H).

**<sup>13</sup>C NMR** (126 MHz, CDCl<sub>3</sub>) δ 208.3, 158.0, 133.8, 133.0, 129.6, 129.5, 128.9, 127.1, 113.9, 55.4, 50.3, 41.2, 34.2, 25.5.

**HRMS** (ESI) calcd for C<sub>18</sub>H<sub>21</sub>O<sub>2</sub><sup>+</sup> [(M+H)<sup>+</sup>]: calculated 269.1536, found 269.1545.

**Ethyl (*E*)-3-(4-(4-methoxyphenyl)butanoyl)hept-4-enoate (**46**)**

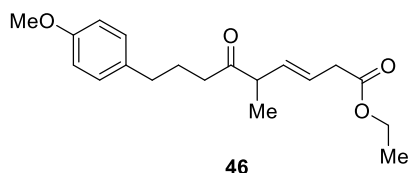

Prepared according to the general procedure A employing Ir[dF(CF<sub>3</sub>)ppy]<sub>2</sub>(dtbbpy)PF<sub>6</sub> (3.6 mg, 0.003 mmol), dtbbpy (**L1**) (20.9 mg, 0.078 mmol), Na<sub>2</sub>HPO<sub>4</sub> (63.9 mg, 0.45 mmol), NH<sub>4</sub>Cl (16.2 mg, 0.3 mmol), NiBr<sub>2</sub>·DME (18.5 mg, 0.06 mmol), 4-(4-methoxyphenyl)butyric acid (58.2 mg, 0.3 mmol), DMDC (60.3 mg, 48 μL, 0.45 mmol), a teflon stir bar, ethyl 3-hexenoate (85.3 mg, 95 μL, 0.6 mmol) and *i*PrOAc (6 mL). After 12 h, the reaction mixture was then passed through a short pad of silica gel using EtOAc/PE (1/5) as the eluent (~25 mL). The resulting mixture was concentrated, and the residue was purified by flash chromatography (PE/EA = 10/1) on silica gel to afford **46** (60.1 mg, 0.189 mmol, 63% yield, *E/Z* 4.6/1) as a yellow liquid.

**<sup>1</sup>H NMR** (300 MHz, CDCl<sub>3</sub>) δ 7.08 (d, *J* = 8.7 Hz, 2H), 6.81 (d, *J* = 8.4 Hz, 2H), 5.72 – 5.57 (m, 1H), 5.32 – 5.17 (m, 1H), 4.17 – 4.02 (m, 2H), 3.96 – 3.84 (m, 0.17H), 3.78 (s, 3H), 3.59 – 3.44 (m, 0.83H), 2.85 (dd, *J* = 16.5, 9.0 Hz, 1H), 2.65 – 2.42 (m, 4H), 2.39 – 2.28 (m, 1H), 1.86 (p, *J* = 7.5 Hz, 2H), 1.73 (dd, *J* = 6.9, 1.8 Hz, 0.49H), 1.67 (dd, *J* = 6.3, 1.5 Hz, 2.51H), 1.26 – 1.18 (m, 3H).

**<sup>13</sup>C NMR** (126 MHz, CDCl<sub>3</sub>) δ 210.0, 172.3, 158.0, 134.0, 130.3, 129.5, 127.4, 113.9, 60.7, 55.4, 51.9, 40.6, 35.8, 34.3, 25.4, 18.2, 14.3.

**HRMS** (ESI) calcd for C<sub>20</sub>H<sub>29</sub>O<sub>4</sub><sup>+</sup> [(M+H)<sup>+</sup>]: calculated 333.2060, found 333.2051.

**(E)-12-methoxy-1-(4-methoxyphenyl)-6,10-dimethyldodec-6-en-4-one (47)**

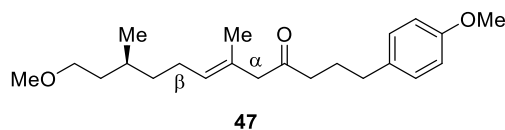

Prepared according to the general procedure A employing Ir[dF(CF<sub>3</sub>)ppy]<sub>2</sub>(dtbbpy)PF<sub>6</sub> (3.6 mg, 0.003 mmol), dtbbpy (**L1**) (20.9 mg, 0.078 mmol), Na<sub>2</sub>HPO<sub>4</sub> (63.9 mg, 0.45 mmol), NH<sub>4</sub>Cl (16.2 mg, 0.3 mmol), NiBr<sub>2</sub>·DME (18.5 mg, 0.06 mmol), 4-(4-methoxyphenyl)butyric acid (58.2 mg, 0.3 mmol), DMDC (60.3 mg, 48 μL, 0.45 mmol), a teflon stir bar, 8-methoxy-2,6-dimethyloct-2-ene (102.1 mg, 0.6 mmol) and *i*PrOAc (6 mL). After 12 h, the reaction mixture was then passed through a short pad of silica gel using EtOAc/PE (1/5) as the eluent (~25 mL). The resulting mixture was concentrated, and the residue was purified by flash chromatography (PE/EA = 10/1) on silica gel to afford **47** (57.1 mg, 0.165 mmol, 55% yield, α/β 4/1, E/Z 1.7/1, dr 1/1) as a colorless liquid.

**<sup>1</sup>H NMR** (300 MHz, CDCl<sub>3</sub>) δ 7.11 – 7.03 (m, 2H), 6.82 (d, *J* = 8.4 Hz, 2H), 5.33 (t, *J* = 7.1 Hz, 0.30H), 5.27 – 5.16 (m, 0.50H), 4.95 – 4.83 (m, 0.20H), 3.78 (s, 3H), 3.44 – 3.35 (m, 2H), 3.34 – 3.28 (m, 3H), 3.08 (s, 0.58 H), 3.01 (s, 1.02H), 2.59 – 2.49 (m, 2H), 2.42 (t, *J* = 7.5 Hz, 2H), 2.09 – 1.91 (m, 2H), 1.90 – 1.78 (m, 2H), 1.73 – 1.64 (m, 2H), 1.59 – 1.49 (m, 2H), 1.44 – 1.31 (m, 2H), 1.30 – 1.06 (m, 2H), 0.93 – 0.80 (m, 3H).

**<sup>13</sup>C NMR** (126 MHz, CDCl<sub>3</sub>) δ 209.8, 208.8, 158.0, 133.9, 133.8, 130.2, 129.5, 129.3, 128.9, 113.94, 113.92, 113.89, 71.24, 71.20, 58.7, 55.4, 54.2, 46.7, 41.2, 40.9, 37.0, 36.7, 34.3, 29.75, 29.73, 26.0, 25.7, 25.6, 24.3, 19.6, 16.5.

**HRMS** (ESI) calcd for C<sub>22</sub>H<sub>34</sub>O<sub>3</sub>Na<sup>+</sup> [(M+Na)<sup>+</sup>]: calculated 369.2400, found 369.2395.

**1-(6,6-Dimethylbicyclo[3.1.1]hept-2-en-2-yl)-5-(4-methoxyphenyl)pentan-2-one (48)**

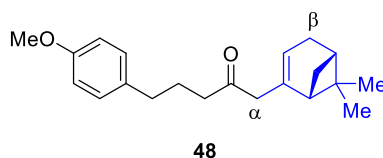

Prepared according to the general procedure A employing Ir[dF(CF<sub>3</sub>)ppy]<sub>2</sub>(dtbbpy)PF<sub>6</sub> (3.6 mg, 0.003 mmol), dtbbpy (**L1**) (20.9 mg, 0.078 mmol), Na<sub>2</sub>HPO<sub>4</sub> (63.9 mg, 0.45 mmol), NH<sub>4</sub>Cl (16.2 mg, 0.3 mmol), NiBr<sub>2</sub>·DME (18.5 mg, 0.06 mmol), 4-(4-methoxyphenyl)butyric acid (58.2 mg, 0.3 mmol), DMDC (60.3 mg, 48 μL, 0.45 mmol), a teflon stir bar, α-pinene (81.7 mg, 95 μL, 0.6 mmol)

and *i*PrOAc (6 mL). After 12 h, the reaction mixture was then passed through a short pad of silica gel using EtOAc/PE (1/5) as the eluent (~25 mL). The resulting mixture was concentrated, and the residue was purified by flash chromatography (PE/EA = 10/1) on silica gel to afford **48** (54.3 mg, 0.174 mmol, 58% yield,  $\alpha/\beta$  9.5/1,  $\alpha$ : *dr* 4.9/1,  $\beta$ : 3.9/1) as a colorless liquid.

**<sup>1</sup>H NMR** (300 MHz, CDCl<sub>3</sub>)  $\delta$  7.08 (d, *J* = 8.4 Hz, 2H), 6.82 (d, *J* = 8.7 Hz, 2H), 5.38 – 5.29 (m, 1H), 3.79 (s, 3H), 3.15 – 3.11 (m, 0.18H), 3.11 – 2.93 (m, 1.72H), 2.54 (t, *J* = 7.2 Hz, 2H), 2.50 – 2.34 (m, 3H), 2.33 – 2.19 (m, 2H), 2.16 – 2.04 (m, 1H), 2.03 – 1.96 (m, 1H), 1.89 – 1.81 (m, 2H), 1.71 (t, *J* = 1.8 Hz, 0.54H), 1.32 (s, 0.44H), 1.25 (s, 2.14H), 1.17 (s, 0.43H), 1.16 (s, 0.11H), 1.14 (s, 0.43H), 1.13 (m, 0.11H), 0.85 (s, 0.44H), 0.81 (s, 2.14H).

**<sup>13</sup>C NMR** (126 MHz, CDCl<sub>3</sub>)  $\delta$  209.2, 158.0, 141.9, 133.9, 129.5, 121.3, 113.9, 55.4, 51.7, 46.0, 41.3, 40.6, 38.1, 34.3, 31.9, 31.7, 26.3, 25.5, 21.1.

**HRMS** (ESI) calcd for C<sub>21</sub>H<sub>28</sub>O<sub>2</sub>Na<sup>+</sup> [(M+Na)<sup>+</sup>]: calculated 335.1982, found 335.1974.

**1-(6-Isopropyl-6-methoxy-3-methylcyclohex-2-en-1-yl)-4-(4-methoxyphenyl)butan-1-one (49)**

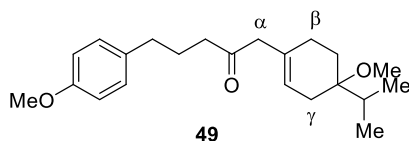

Prepared according to the general procedure A employing Ir[dF(CF<sub>3</sub>)ppy]<sub>2</sub>(dtbbpy)PF<sub>6</sub> (3.6 mg, 0.003 mmol), dtbbpy (**L1**) (20.9 mg, 0.078 mmol), Na<sub>2</sub>HPO<sub>4</sub> (63.9 mg, 0.45 mmol), NH<sub>4</sub>Cl (16.3 mg, 0.3 mmol), NiBr<sub>2</sub>·DME (18.5 mg, 0.06 mmol), 4-(4-methoxyphenyl)butyric acid (58.2 mg, 0.3 mmol), DMDC (60.3 mg, 48  $\mu$ L, 0.45 mmol), a teflon stir bar, 4-isopropyl-4-methoxy-1-methylcyclohex-1-ene (100.8 mg, 0.6 mmol) and *i*PrOAc (6 mL). After 12 h, the reaction mixture was then passed through a short pad of silica gel using EtOAc/PE (1/5) as the eluent (~25 mL). The resulting mixture was concentrated, and the residue was purified by flash chromatography (PE/EA = 10/1) on silica gel to afford **49** (61.9 mg, 0.18 mmol, 60% yield, a mixture of regioisomers and diastereoisomers, 5.6/1.3/1) as a colorless liquid.

**<sup>1</sup>H NMR** (300 MHz, CDCl<sub>3</sub>)  $\delta$  7.07 (d, *J* = 8.7 Hz, 2H), 6.82 (m, d, *J* = 8.7 Hz, 2H), 5.46 – 5.37 (m, 1H), 3.78 (s, 3H), 3.13 (s, 2.11H), 3.09 (s, 0.51H), 3.01 (s, 1.38H), 2.54 (t, *J* = 7.5 Hz, 2H), 2.44 (t, *J* = 7.5 Hz, 2H), 2.36 (t, *J* = 7.2 Hz, 1H), 2.21 – 1.91 (m, 4H), 1.88 – 1.70 (m, 4H), 1.63 (d, *J* = 5.7 Hz, 1H), 0.95 – 0.82 (m, 6H).

<sup>13</sup>C NMR (126 MHz, CDCl<sub>3</sub>) δ 209.9, 158.0, 133.9, 131.7, 129.5, 123.4, 113.9, 76.3, 55.4, 52.1, 48.2, 40.9, 34.3, 31.5, 30.1, 26.8, 25.9, 25.6, 17.7, 16.6.

HRMS (ESI) calcd for C<sub>22</sub>H<sub>32</sub>O<sub>3</sub>Na<sup>+</sup> [(M+Na)<sup>+</sup>]: calculated 367.2244, found 367.2235.

#### IV. Late-stage functionalization of bioactive molecules

(4*R*)-4-((8*R*,9*S*,10*S*,13*R*,14*S*)-3-((*tert*-butyldimethylsilyl)oxy)-10,13-dimethylhexadecahydro-1*H*-cyclopenta[α]phenanthren-17-yl)-1-(cyclohex-2-en-1-yl)pentan-1-one (**51**)

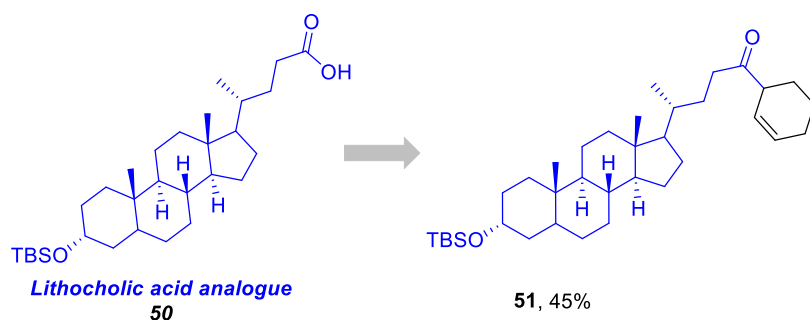

Prepared according to the general procedure A employing Ir[dF(CF<sub>3</sub>)ppy]<sub>2</sub>(dtbbpy)PF<sub>6</sub> (3.6 mg, 0.003 mmol), dtbbpy (**L1**) (20.9 mg, 0.078 mmol), Na<sub>2</sub>HPO<sub>4</sub> (63.9 mg, 0.45 mmol), NH<sub>4</sub>Cl (16.3 mg, 0.3 mmol), NiBr<sub>2</sub>·DME (18.5 mg, 0.06 mmol), lithocholic acid analogue (166.3 mg, 0.3 mmol), DMDC (60.3 mg, 48 μL, 0.45 mmol), a teflon stir bar, cyclohexene (49.3 mg, 61 μL, 0.6 mmol) and *i*PrOAc (6 mL). After 12 h, the reaction mixture was then passed through a short pad of silica gel using EtOAc/PE (1/5) as the eluent (~25 mL). The resulting mixture was concentrated, and the residue was purified by flash chromatography (PE/EA = 10/1) on silica gel to afford **51** (74.8 mg, 0.135 mmol, 45% yield) as a colorless liquid.

<sup>1</sup>H NMR (300 MHz, CDCl<sub>3</sub>) δ 5.90 – 5.83 (m, 1H), 5.77 – 5.71 (m, 1H), 3.60 – 3.54 (m, 1H), 3.15 – 3.08 (m, 1H), 2.49 – 2.37 (m, 2H), 2.02 – 1.98 (m, 2H), 1.86 – 1.70 (m, 10H), 1.62 – 1.55 (m, 3H), 1.42 – 1.23 (m, 16H), 1.13 – 0.99 (m, 7H), 0.89 (s, 9H), 0.62 (s, 3H), 0.05 (s, 6H).

<sup>13</sup>C NMR (126 MHz, CDCl<sub>3</sub>) δ 212.8, 130.1, 124.5, 72.9, 60.6, 58.6, 56.6, 56.2, 56.1, 49.1, 42.9, 42.5, 40.4, 40.3, 37.1, 36.0, 35.7, 35.5, 34.7, 31.2, 28.4, 27.5, 26.6, 26.1, 24.9, 24.4, 23.5, 20.9, 18.6, 18.5, 14.4, 12.2, -4.4.

HRMS (ESI) calcd for C<sub>36</sub>H<sub>62</sub>O<sub>2</sub>SiNa<sup>+</sup> [(M+Na)<sup>+</sup>]: calculated 577.4411, found 577.4404.

**(8*R*,9*S*,10*S*,13*R*,14*S*)-17-((2*R*)-5-(cyclohex-2-en-1-yl)-5-oxopentan-2-yl)-10,13**

**Dimethylhexadecahydro-3*H*-cyclopenta[ $\alpha$ ]phenanthren-3-one (**53**)**

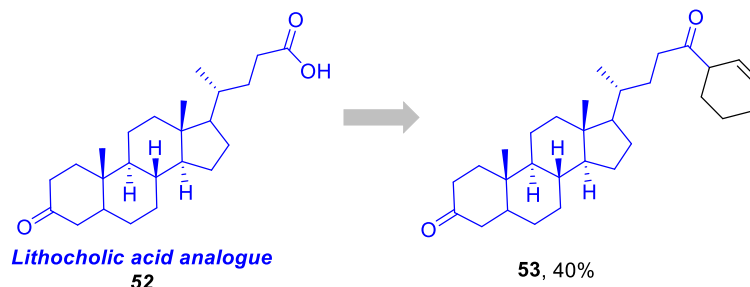

Prepared according to the general procedure A employing Ir[dF(CF<sub>3</sub>)ppy]<sub>2</sub>(dtbbpy)PF<sub>6</sub> (3.6 mg, 0.003 mmol), dtbbpy (**L1**) (20.9 mg, 0.078 mmol), Na<sub>2</sub>HPO<sub>4</sub> (63.8 mg, 0.45 mmol), NH<sub>4</sub>Cl (16.3 mg, 0.3 mmol), NiBr<sub>2</sub>·DME (18.5 mg, 0.06 mmol), lithocholic acid analogue (112.2 mg, 0.3 mmol), DMDC (60.3 mg, 48  $\mu$ L, 0.45 mmol), a teflon stir bar, cyclohexene (49.3 mg, 61  $\mu$ L, 0.6 mmol) and *i*PrOAc (6 mL). After 12 h, the reaction mixture was then passed through a short pad of silica gel using EtOAc/PE (1/5) as the eluent (~25 mL). The resulting mixture was concentrated, and the residue was purified by flash chromatography (PE/EA = 10/1) on silica gel to afford **53** (52.6 mg, 0.12 mmol, 40% yield) as a colorless liquid.

**<sup>1</sup>H NMR** (500 MHz, CDCl<sub>3</sub>)  $\delta$  5.90 – 5.83 (m, 1H), 5.78 – 5.67 (m, 1H), 3.14 – 3.08 (m, 1H), 2.69 (t,  $J$  = 13.5 Hz, 1H), 2.52 – 2.46 (m, 1H), 2.42 – 2.31 (m, 2H), 2.16 – 2.13 (m, 1H), 2.02 – 1.99 (m, 4H), 1.87 – 1.73 (m, 7H), 1.59 – 1.55 (m, 1H), 1.49 – 1.41 (m, 5H), 1.39 – 1.33 (m, 3H), 1.30 – 1.19 (m, 5H), 1.10 – 1.06 (m, 3H), 1.00 (s, 3H), 0.92 – 0.89 (m, 4H), 0.66 (s, 3H).

**<sup>13</sup>C NMR** (126 MHz, CDCl<sub>3</sub>)  $\delta$  213.7, 212.7, 130.1, 124.4, 56.6, 56.2, 49.1, 44.4, 42.9, 42.5, 40.8, 40.2, 37.6, 37.3, 37.1, 35.6, 35.5, 35.0, 29.9, 28.3, 26.7, 25.9, 25.0, 24.94, 24.91, 24.3, 22.8, 21.3, 21.00, 20.98, 18.6, 12.2.

**HRMS** (ESI) calcd for C<sub>30</sub>H<sub>46</sub>O<sub>2</sub>Na<sup>+</sup> [(M+Na)<sup>+</sup>]: calculated 461.3390, found 461.3380.

**1-(Cyclohex-2-en-1-yl)-3-(4,5-diphenyloxazol-2-yl)propan-1-one (**55**)**

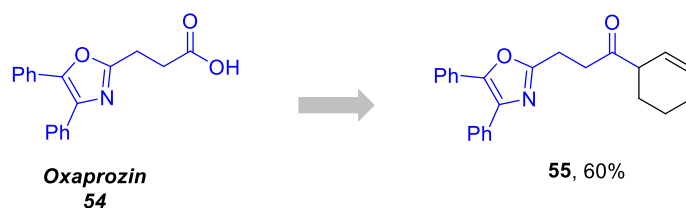



Prepared according to the general procedure A employing Ir[dF(CF<sub>3</sub>)ppy]<sub>2</sub>(dtbbpy)PF<sub>6</sub> (3.6 mg, 0.003 mmol), dtbbpy (**L1**) (20.9 mg, 0.078 mmol), Na<sub>2</sub>HPO<sub>4</sub> (63.9 mg, 0.45 mmol), NH<sub>4</sub>Cl (16.2 mg, 0.3 mmol), NiBr<sub>2</sub>·DME (18.5 mg, 0.06 mmol), Oxaprozin (87.9 mg, 0.3 mmol), DMDC (60.3 mg, 48 μL, 0.45 mmol), a teflon stir bar, cyclohexene (49.3 mg, 61 μL, 0.6 mmol) and *i*PrOAc (6 mL). After 12 h, the reaction mixture was then passed through a short pad of silica gel using EtOAc/PE (1/2) as the eluent (~25 mL). The resulting mixture was concentrated, and the residue was purified by flash chromatography (PE/EA = 5/1) on silica gel to afford **55** (64.3 mg, 0.18 mmol, 60% yield) as a colorless liquid.

**<sup>1</sup>H NMR** (300 MHz, CDCl<sub>3</sub>) δ 7.65 – 7.59 (m, 2H), 7.59 – 7.53 (m, 2H), 7.41 – 7.29 (m, 6H), 5.95 – 5.86 (m, 1H), 5.85 – 5.75 (m, 1H), 3.26 – 3.18 (m, 1H), 3.17 – 3.04 (m, 4H), 2.08 – 1.98 (m, 2H), 1.94 – 1.81 (m, 2H), 1.78 – 1.69 (m, 1H), 1.63 – 1.52 (m, 1H).

**<sup>13</sup>C NMR** (126 MHz, CDCl<sub>3</sub>) δ 209.8, 162.6, 145.5, 135.2, 132.7, 130.6, 129.2, 128.8, 128.7, 128.5, 128.2, 128.0, 126.6, 124.0, 49.1, 37.2, 24.95, 24.93, 22.4, 20.9.

**HRMS** (ESI) calcd for C<sub>24</sub>H<sub>24</sub>NO<sub>2</sub><sup>+</sup> [(M+H)<sup>+</sup>]: calculated 358.1802, found 358.1796.

#### 2-(4-Isobutylphenyl)-5,6-dimethylhept-5-en-3-one (**57**)

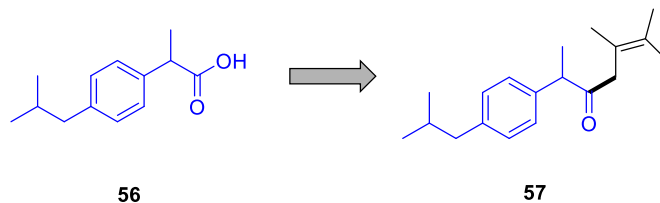

Prepared according to the general procedure A employing Ir[dF(CF<sub>3</sub>)ppy]<sub>2</sub>(dtbbpy)PF<sub>6</sub> (3.6 mg, 0.003 mmol), dtbbpy (**L1**) (20.9 mg, 0.078 mmol), Na<sub>2</sub>HPO<sub>4</sub> (63.9 mg, 0.45 mmol), NH<sub>4</sub>Cl (16.1 mg, 0.3 mmol), NiBr<sub>2</sub>·DME (18.5 mg, 0.06 mmol), ibuprofen (61.8 mg, 0.3 mmol), DMDC (60.3 mg, 48 μL, 0.45 mmol), a teflon stir bar, 2,3-dimethyl-2-butene (50.5 mg, 71 μL, 0.6 mmol) and *i*PrOAc (6 mL). After 12 h, the reaction mixture was then passed through a short pad of silica gel using EtOAc/PE (1/5) as the eluent (~25 mL). The resulting mixture was concentrated, and the residue was purified by flash chromatography (PE/EA = 10/1) on silica gel to afford **57** (50.6 mg, 0.186 mmol, 62% yield) as a colorless liquid.

**<sup>1</sup>H NMR** (500 MHz, CDCl<sub>3</sub>) δ 7.12 – 7.06 (m, 4H), 3.77 (q, *J* = 7.0 Hz, 1H), 3.13 (d, *J* = 16.0 Hz, 1H), 3.04 (d, *J* = 16.0 Hz, 1H), 2.44 (d, *J* = 7.0 Hz, 2H), 1.89 – 1.78 (m, 1H), 1.65 (s, 3H), 1.52 (s, 3H), 1.47 (s, 3H), 1.35 (d, *J* = 7.0 Hz, 3H), 0.88 (d, *J* = 7.0 Hz, 6H).

$^{13}\text{C}$  NMR (126 MHz,  $\text{CDCl}_3$ )  $\delta$  209.8, 140.7, 138.1, 129.7, 128.6, 127.8, 121.4, 51.7, 47.4, 45.2, 30.3, 22.5, 20.7, 19.2, 18.0.

HRMS (ESI) calcd for  $\text{C}_{19}\text{H}_{29}\text{O}^+ [(M+H)^+]$ : calculated 273.2213, found 273.2217.

## V. Synthetic applications and large-scale synthesis

### Sequential allylation of dicarboxylic acids

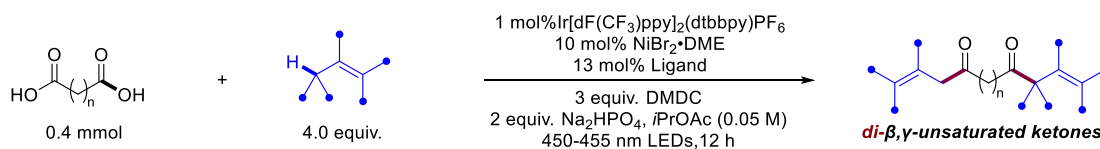

### General procedure B:

An oven-dried 25 mL flask was evacuated and back-filled with N<sub>2</sub> for three times. After cooling at room temperature, Ir[dF(CF<sub>3</sub>)ppy]<sub>2</sub>(dtbbpy)PF<sub>6</sub> (0.003 mmol), dtbbpy (**L1**) (0.039 mmol), Na<sub>2</sub>HPO<sub>4</sub> (0.6 mmol), NiBr<sub>2</sub>·DME (0.03 mmol), Adipic acid (0.3 mmol), DMDC (0.9 mmol) and *i*PrOAc (4 mL) were added sequentially under N<sub>2</sub> atmosphere. The reaction mixture was stirred at room temperature for 30 min. Then corresponding alkene (1.2 mmol) and the *i*PrOAc (2 mL) was injected through the syringe into the mentioned above flask containing the Ir/Ni catalysts. The resulting crude mixture was then allowed to stir at room temperature and irradiated by 450-455 nm LEDs at a distance of 2 cm for 12 h at room temperature. After 12 h, the reaction mixture was then passed through a short pad of silica gel, using EtOAc/hexanes (1/5) as the eluent (~25 mL). The resulting mixture was concentrated, and the residue was purified by flash chromatography on silica gel, before it was purified by flash chromatography on silica gel to afford the desired *di-β,γ*-unsaturated ketone.

### 2,3,12,13-Tetramethyltetradeca-2,12-diene-5,10-dione (**58**)

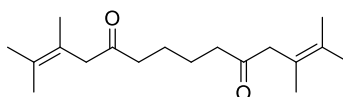

**58**

Prepared according to the general procedure B employing Ir[dF(CF<sub>3</sub>)ppy]<sub>2</sub>(dtbbpy)PF<sub>6</sub> (3.6 mg, 0.003 mmol), dtbbpy (**L1**) (10.4 mg, 0.039 mmol), Na<sub>2</sub>HPO<sub>4</sub> (85.1 mg, 0.6 mmol), NiBr<sub>2</sub>·DME (9.2 mg, 0.03 mmol), Adipic acid (43.8 mg, 0.3 mmol), DMDC (134.1 mg, 97  $\mu\text{L}$ , 0.9 mmol), a teflon stir bar, 2,3-dimethyl-2-butene (101 mg, 143  $\mu\text{L}$ , 1.2 mmol) and *i*PrOAc (6 mL). After 12 h, the reaction mixture was then passed through a short pad of silica gel using EtOAc/PE (1/5) as the

eluent (~25 mL). The resulting mixture was concentrated, and the residue was purified by flash chromatography (PE/EA = 10/1) on silica gel to afford **58** (55.9 mg, 0.201 mmol, 67% yield) as a colorless liquid.

**<sup>1</sup>H NMR** (300 MHz, CDCl<sub>3</sub>) δ 3.11 (s, 4H), 2.43 – 2.35 (m, 4H), 1.70 (s, 6H), 1.67 (s, 6H), 1.65 (s, 6H), 1.55 – 1.49 (m, 4H).

**<sup>13</sup>C NMR** (126 MHz, CDCl<sub>3</sub>) δ 209.6, 128.7, 121.4, 49.3, 41.6, 23.5, 20.9, 20.8, 19.4.

**HRMS** (ESI) calcd for C<sub>18</sub>H<sub>31</sub>O<sub>2</sub><sup>+</sup> [(M+H)<sup>+</sup>]: calculated 279.2319, found 279.2312.

#### 1,6-Di(cyclohex-2-en-1-yl)hexane-1,6-dione (**59**)

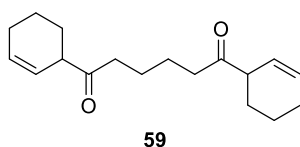

Prepared according to the general procedure B employing Ir[dF(CF<sub>3</sub>)ppy]<sub>2</sub>(dtbbpy)PF<sub>6</sub> (3.6 mg, 0.003 mmol), dtbbpy (**L1**) (10.4 mg, 0.039 mmol), Na<sub>2</sub>HPO<sub>4</sub> (85.1 mg, 0.6 mmol), NiBr<sub>2</sub>·DME (9.2 mg, 0.03 mmol), Adipic acid (43.8 mg, 0.3 mmol), DMDC (134.1 mg, 97 μL, 0.9 mmol), a teflon stir bar, cyclohexene (98.6 mg, 122 μL, 1.2 mmol) and *i*PrOAc (6 mL). After 12 h, the reaction mixture was then passed through a shortpad of silica gel using EtOAc/PE (1/5) as the eluent (~25 mL). The resulting mixture was concentrated, and the residue was purified by flash chromatography (PE/EA = 10/1) on silica gel to afford **59** (49.3 mg, 0.18 mmol, 60% yield) as a colorless liquid.

**<sup>1</sup>H NMR** (300 MHz, CDCl<sub>3</sub>) δ 5.91 – 5.81 (m, 2H), 5.75 – 5.67 (m, 2H), 3.15 – 3.02 (m, 2H), 2.54 – 2.42 (m, 4H), 2.05 – 1.94 (m, 4H), 1.84 – 1.65 (m, 6H), 1.62 – 1.50 (m, 6H).

**<sup>13</sup>C NMR** (126 MHz, CDCl<sub>3</sub>) δ 211.9, 130.2, 124.2, 49.1, 40.5, 24.93, 24.91, 23.5, 21.0.

**HRMS** (ESI) calcd for C<sub>18</sub>H<sub>27</sub>O<sub>2</sub><sup>+</sup> [(M+H)<sup>+</sup>]: calculated 275.2006, found 275.2014.

#### (3*E*,13*E*)-2,2,4,13,15,15-hexamethylhexadeca-3,13-diene-6,11-dione (**60**)

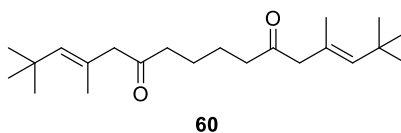

Prepared according to the general procedure B employing Ir[dF(CF<sub>3</sub>)ppy]<sub>2</sub>(dtbbpy)PF<sub>6</sub> (3.6 mg, 0.003 mmol), dtbbpy (**L1**) (10.4 mg, 0.039 mmol), Na<sub>2</sub>HPO<sub>4</sub> (85.1 mg, 0.6 mmol), NiBr<sub>2</sub>·DME (9.2 mg, 0.03 mmol), Adipic acid (43.8 mg, 0.3 mmol), DMDC (134.1 mg, 97 μL, 0.90 mmol), a teflon stir bar, 2,2,4-trimethyl-3-pentene (134.7 mg, 187.0 μL, 1.2 mmol) and *i*PrOAc (6 mL). After 12 h,

the reaction mixture was then passed through a short pad of silica gel using EtOAc/PE (1/5) as the eluent (~25 mL). The resulting mixture was concentrated, and the residue was purified by flash chromatography (PE/EA = 10/1) on silica gel to afford **60** (70.2 mg, 0.21 mmol, 70% yield, *E/Z* 14.4/1) as a colorless liquid.

**<sup>1</sup>H NMR** (300 MHz, CDCl<sub>3</sub>) δ 5.38 (s, 0.13H), 5.27 (s, 1.87H), 3.24 (s, 0.26H), 2.94 (s, 3.74H), 2.47 – 2.34 (m, 4H), 1.69 (s, 2.81H), 1.68 (s, 2.80H), 1.63 (s, 0.19H), 1.62 (s, 0.19H), 1.55 – 1.44 (m, 4H), 1.09 (s, 16.83H), 1.05 (s, 1.17H).

**<sup>13</sup>C NMR** (126 MHz, CDCl<sub>3</sub>) δ 209.7, 208.6, 140.4, 139.1, 128.1, 127.1, 56.3, 47.0, 42.1, 41.1, 32.5, 31.4, 30.9, 26.3, 23.4, 17.6.

**HRMS** (ESI) calcd for C<sub>22</sub>H<sub>39</sub>O<sub>2</sub><sup>+</sup> [(M+H)<sup>+</sup>]: calculated 335.2945, found 335.2950.

### 1,8-Diphenyloctane-2,7-dione (**61**)

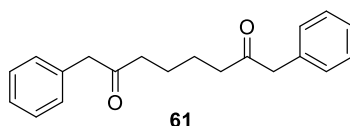

Prepared according to the general procedure B employing Ir[dF(CF<sub>3</sub>)ppy]<sub>2</sub>(dtbbpy)PF<sub>6</sub> (3.6 mg, 0.003 mmol), dtbbpy (**L1**) (10.4 mg, 0.039 mmol), Na<sub>2</sub>HPO<sub>4</sub> (85.1 mg, 0.6 mmol), NiBr<sub>2</sub>·DME (9.2 mg, 0.03 mmol), adipic acid (43.8 mg, 0.3 mmol), DMDC (134.1 mg, 97 μL, 0.90 mmol), a teflon stir bar, toluene (110.6 mg, 127 μL, 1.2 mmol) and *i*PrOAc (6 mL). After 12 h, the reaction mixture was then passed through a short pad of silica gel using EtOAc/PE (1/2) as the eluent (~25 mL). The resulting mixture was concentrated, and the residue was purified by flash chromatography (PE/EA = 5/1) on silica gel to afford **61** (44.1 mg, 0.15 mmol, 50% yield) as a colorless liquid.

**<sup>1</sup>H NMR** (300 MHz, CDCl<sub>3</sub>) δ 7.39 – 7.26 (m, 6H), 7.23 – 7.15 (m, 4H), 3.66 (s, 4H), 2.47 – 2.36 (m, 4H), 1.54 – 1.44 (m, 4H).

**<sup>13</sup>C NMR** (126 MHz, CDCl<sub>3</sub>) δ 208.1, 134.4, 129.5, 128.8, 127.1, 50.3, 41.7, 23.1.

**HRMS** (ESI) calcd for C<sub>20</sub>H<sub>22</sub>O<sub>2</sub>Na<sup>+</sup> [(M+Na)<sup>+</sup>]: calculated 317.1512, found 317.1503.

### Sequential acylation of alkenes

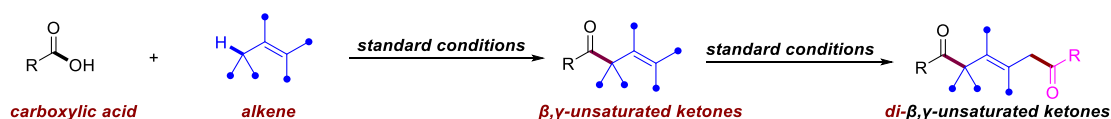

### General procedure C:

An oven-dried 25 mL flask was evacuated and back-filled with N<sub>2</sub> for three times. After cooling at room temperature, Ir[dF(CF<sub>3</sub>)ppy]<sub>2</sub>(dtbbpy)PF<sub>6</sub> (0.004 mmol), dtbbpy (**L1**) (0.052 mmol), Na<sub>2</sub>HPO<sub>4</sub> (0.8 mmol), NiBr<sub>2</sub>·DME (0.04 mmol), carboxylic acid (0.4 mmol), DMDC (0.6 mmol) and *i*PrOAc (4 mL) were added sequentially under N<sub>2</sub> atmosphere. The reaction mixture was stirred at room temperature for 30 min. Then 2,3-dimethyl-2-butene (0.8 mmol) and the *i*PrOAc (4 mL) was injected through the syringe into the mentioned above flask containing the Ir/Ni catalysts.

The resulting crude mixture was then allowed to stir at room temperature and irradiated by 450-455 nm LEDs at a distance of 2 cm for 18 h at room temperature. After 18 h, the reaction mixture was then passed through a short pad of silica gel, with EtOAc as the eluent ( ~25 mL), before it was purified by flash chromatography on silica gel to afford the desired ketone.

Adding the obtained ketone (2.0 equiv.) and carboxylic acid (1.0 equiv.) to the above reaction steps. The resulting crude mixture was then allowed to stir at room temperature and irradiated by 450-455 nm LEDs at a distance of 2 cm for 18 h at room temperature. After 18 h, the reaction mixture was then passed through a short pad of silica gel with( EtOAc ) as the eluent ( ~25 mL), before it was purified by flash chromatography on silica gel to afford the desired ketone.

**Methyl (E)-4-(9-(4-methoxyphenyl)-5,6-dimethyl-3,8-dioxonon-5-en-1-yl)benzoate (**62**)**

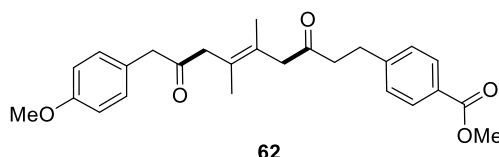

Prepared according to the general procedure C employing Ir[dF(CF<sub>3</sub>)ppy]<sub>2</sub>(dtbbpy)PF<sub>6</sub> (4.8 mg, 0.004 mmol), dtbbpy (**L1**) (13.9 mg, 0.052 mmol), Na<sub>2</sub>HPO<sub>4</sub> (113.5 mg, 0.8 mmol), NiBr<sub>2</sub>·DME (12.3 mg, 0.04 mmol), 4-methoxyphenylacetic acid (66.5 mg, 0.4 mmol), DMDC (80.5 mg, 64 μL, 0.60 mmol), a teflon stir bar, 2,3-dimethyl-2-butene (67.3 mg, 95 μL, 0.8 mmol) and *i*PrOAc (8 mL). After 18 h, the reaction mixture was then passed through a short pad of silica gel using EtOAc as the eluent ( ~25 mL), before it was purified by flash chromatography on silica gel to afford the corresponding ketone. Adding the obtained ketone (185.8 mg, 2.0 equiv.) and 3-[4-(methoxycarbonyl)phenyl]propanoic acid (83.3 mg, 1.0 equiv.) to the above reaction steps. The resulting crude mixture was then allowed to stir at room temperature and irradiated by 450-455 nm LEDs at a distance of 2 cm for 18 h at room temperature. After 18 h, the reaction mixture was then passed through a short pad of silica gel using EtOAc as the eluent ( ~25 mL). The resulting mixture

was concentrated, and the residue was purified by flash chromatography (PE/EA = 3/1) on silica gel to afford **62** (84.4 mg, 0.2 mmol, 50% yield, E/Z 7.7/1) as a yellow liquid.

**<sup>1</sup>H NMR** (500 MHz, CDCl<sub>3</sub>) δ 7.93 (d, *J* = 8.3 Hz, 2H), 7.24 (d, *J* = 8.0 Hz, 2H), 7.11 (d, *J* = 9.0 Hz, 2H), 6.86 (d, *J* = 8.5 Hz, 2H), 3.90 (s, 3H), 3.79 (s, 3H), 3.77 (s, 0.23H), 3.63 (s, 1.77H), 3.21 (s, 2H), 3.16 (s, 2H), 2.94 (t, *J* = 7.5 Hz, 2H), 2.78 (t, *J* = 7.5 Hz, 2H), 1.58 (s, 3H), 1.53 (s, 3H).

**<sup>13</sup>C NMR** (126 MHz, CDCl<sub>3</sub>) δ 207.6, 206.5, 167.2, 158.8, 146.8, 130.5, 129.9, 128.6, 128.2, 126.5, 126.3, 126.2, 114.3, 55.4, 52.1, 49.5, 48.7, 48.0, 42.8, 29.8, 19.9, 19.8.

**HRMS** (ESI) for C<sub>27</sub>H<sub>31</sub>O<sub>5</sub><sup>+</sup> [(M+H)<sup>+</sup>]: calculated 423.2166, found 423.2174.

**(*E*)-1-(4-methoxyphenyl)-6,7-dimethylhexacos-6-ene-4,9-dione (**63**)**

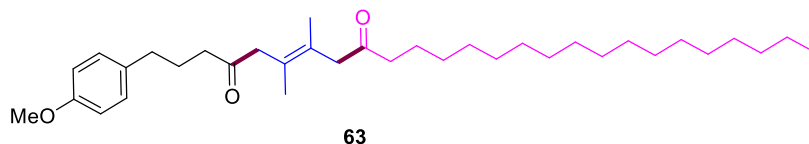

Prepared according to the general procedure D employing Ir[dF(CF<sub>3</sub>)ppy]<sub>2</sub>(dtbbpy)PF<sub>6</sub> (4.8 mg, 0.004 mmol), dtbbpy (**L1**) (13.9 mg, 0.052 mmol), Na<sub>2</sub>HPO<sub>4</sub> (113.5 mg, 0.8 mmol), NiBr<sub>2</sub>·DME (12.3 mg, 0.04 mmol), 4-(4-methoxyphenyl)butyric acid (77.7 mg, 0.4 mmol), DMDC (80.5 mg, 64 μL, 0.60 mmol), a teflon stir bar, 2,3-dimethyl-2-butene (67.3 mg, 95 μL, 0.8 mmol) and *i*PrOAc (8 mL). After 18 h, the reaction mixture was then passed through a short pad of silica gel with EtOAc as the eluent (~25 mL) before it was purified by flash chromatography on silica gel to afford the corresponding ketone. Adding the obtained ketone (208.3 mg, 2.0 equiv.) and stearic acid (113.8 mg, 1.0 equiv) to the above reaction steps. The resulting crude mixture was then allowed to stir at room temperature and irradiated by 450-455 nm LEDs at a distance of 2 cm for 18 h at room temperature. After 18 h, the reaction mixture was then passed through a short pad of silica gel using EtOAc as the eluent (~25 mL). The resulting mixture was concentrated, and the residue was purified by flash chromatography (PE/EA = 3/1) on silica gel to afford **63** (105.2 mg, 0.2 mmol, 50% yield, E/Z 5.3/1) as a light yellow liquid.

**<sup>1</sup>H NMR** (300 MHz, CDCl<sub>3</sub>) δ 7.07 (d, *J* = 8.1 Hz, 2H), 6.82 (d, *J* = 8.7 Hz, 2H), 3.78 (s, 3H), 3.65 (d, *J* = 8.1 Hz, 0.64H), 3.13 (d, *J* = 21.0 Hz, 3.36H), 2.54 (t, *J* = 7.2 Hz, 2H), 2.45 – 2.28 (m, 4H), 1.95 – 1.77 (m, 2H), 1.75 – 1.60 (m, 6H), 1.58 – 1.44 (m, 2H), 1.38 – 1.09 (m, 28H), 0.87 (t, *J* = 6.3 Hz, 3H).

<sup>13</sup>C NMR (126 MHz, CDCl<sub>3</sub>) δ 209.4, 209.2, 209.0, 208.8, 158.0, 133.9, 132.9, 129.5, 126.3, 126.1, 119.7, 114.5, 113.93, 113.91, 55.4, 49.2, 49.1, 47.3, 47.2, 42.6, 41.6, 41.4, 32.1, 29.83, 29.79, 29.76, 29.63, 29.58, 29.56, 29.5, 29.4, 25.64, 25.60, 24.0, 23.9, 22.8, 21.2, 20.0, 19.9, 14.3.

HRMS (ESI) calcd for C<sub>35</sub>H<sub>59</sub>O<sub>3</sub><sup>+</sup> [(M+H)<sup>+</sup>]: calculated 527.4459, found 527.4449.

**Dimethyl 4,4'-(5,6-dimethyl-3,8-dioxodec-5-ene-1,10-diyl) (*E*)-dibenzoate (**64**)**

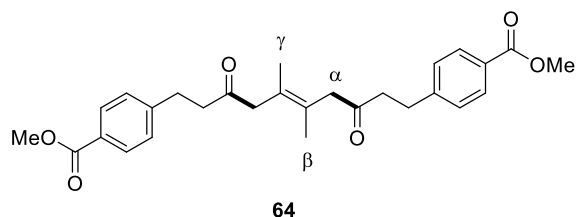

Prepared according to the general procedure D employing Ir[dF(CF<sub>3</sub>)ppy]<sub>2</sub>(dtbbpy)PF<sub>6</sub> (4.8 mg, 0.004 mmol, 0.010 equiv), dtbbpy (**L1**) (13.9 mg, 0.052 mmol), Na<sub>2</sub>HPO<sub>4</sub> (113.5 mg, 0.8 mmol, 2.0 equiv), NiBr<sub>2</sub>·DME (12.3 mg, 0.04 mmol), 3-[4-(methoxycarbonyl)phenyl]propanoic acid (83.2 mg, 0.4 mmol), DMDC (80.5 mg, 64 μL, 0.60 mmol, 1.5 equiv), a teflon stir bar, 2,3-dimethyl-2-butene (67.3 mg, 95 μL, 0.8 mmol) and *i*PrOAc (8 mL). After 18 h, the reaction mixture was then passed through a short pad of silica gel, with(EtOAc) as the eluent (~25 mL), before it was purified by flash chromatography on silica gel to afford the desired ketone. Add the obtained ketone (219.5 mg, 2.0 equiv.) and 3-[4-(methoxycarbonyl)phenyl]propanoic acid (83.2 mg, 1.0 equiv.) to the above reaction steps. The resulting crude mixture was then allowed to stir at room temperature and irradiated by 450-455 nm LEDs at a distance of 2 cm for 18 h at room temperature. After 18 h, the reaction mixture was then passed through a short pad of silica gel using EtOAc as the eluent (~25 mL). The resulting mixture was concentrated, and the residue was purified by flash chromatography (PE/EA = 3/1) on silica gel to afford **64** (185.7 mg, 0.208 mmol, 52% yield, α/β/γ = 2.1/1.9/1) as a light yellow liquid.

<sup>1</sup>H NMR (300 MHz, CDCl<sub>3</sub>) δ 7.92 (d, *J* = 8.4 Hz, 4H), 7.26 – 7.16 (d, *J* = 8.4 Hz, 4H), 3.89 – 3.83 (m, 6H), 3.14 (s, 0.80H), 3.11 (s, 1.52H), 3.04 (s, 1.68H), 2.95 – 2.82 (m, 4H), 2.79 – 2.65 (m, 4H), 1.65 (s, 2.52H), 1.63 (s, 2.28H), 1.55 (s, 1.20H).

<sup>13</sup>C NMR (126 MHz, CDCl<sub>3</sub>) δ 207.5, 207.3, 207.2, 167.04, 167.03, 146.7, 146.6, 133.6, 129.9, 128.6, 128.5, 128.23, 128.21, 126.25, 126.23, 119.1, 52.0, 49.29, 49.26, 47.3, 43.2, 43.0, 42.8, 29.72, 29.68, 21.1, 20.0, 19.8.

**HRMS** (ESI) calcd for  $C_{28}H_{32}O_6Na^+ [(M+Na)^+]$ : calculated 487.2091, found 487.2085.

**(*E*)-1,12-bis(4-methoxyphenyl)-6,7-dimethyldodec-6-ene-4,9-dione (65)**

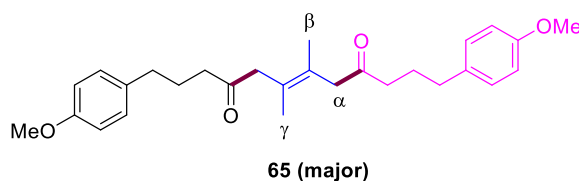

Prepared according to the general procedure D employing  $Ir[dF(CF_3)ppy]_2(dtbbpy)PF_6$  (4.8 mg, 0.004 mmol, 0.010 equiv), dtbbpy (**L1**) (13.9 mg, 0.052 mmol),  $Na_2HPO_4$  (113.5 mg, 0.8 mmol, 2.0 equiv),  $NiBr_2 \cdot DME$  (12.3 mg, 0.04 mmol), 4-(4-methoxyphenyl)butyric acid (77.7 mg, 0.4 mmol), DMDC (80.5 mg, 64  $\mu$ L, 0.60 mmol, 1.5 equiv), a teflon stir bar, 2,3-dimethyl-2-butene (67.3 mg, 95  $\mu$ L, 0.8 mmol) and *i*PrOAc (8 mL). After 18 h, the reaction mixture was then passed through a short pad of silica gel, with (EtOAc) as the eluent (~25 mL), before it was purified by flash chromatography on silica gel to afford the desired ketone. Add the obtained ketone (208.3 mg, 2.0 equiv.) and 4-(4-methoxyphenyl)butyric acid (77.7 mg, 1.0 equiv.) to the above reaction steps. The resulting crude mixture was then allowed to stir at room temperature and irradiated by 450-455 nm LEDs at a distance of 2 cm for 18 h at room temperature. After 18 h, the reaction mixture was then passed through a short pad of silica gel using EtOAc as the eluent (~25 mL). The resulting mixture was concentrated, and the residue was purified by flash chromatography (PE/EA = 3/1) on silica gel to afford **65** (174.5 mg, 0.256 mmol, 64% yield) as a light yellow liquid.

**$^1H$  NMR** (300 MHz,  $CDCl_3$ )  $\delta$  7.08 (d,  $J$  = 8.6 Hz, 4H), 6.82 (d,  $J$  = 8.6 Hz, 4H), 3.78 (s, 6H), 3.62 (s, 0.44H), 3.16 (s, 3.56H), 2.55 (s, 4H), 2.42 (s, 4H), 1.89 – 1.84 (m, 4H), 1.63 (s, 6H).

**$^{13}C$  NMR** (126 MHz,  $CDCl_3$ )  $\delta$  208.8, 158.0, 133.8, 129.5, 126.2, 113.9, 55.4, 49.2, 41.3, 34.3, 25.6, 19.9.

**HRMS** (ESI) calcd for  $C_{28}H_{36}O_4Na^+ [(M+Na)^+]$ : calculated 459.2506, found 459.2499.

**Methyl (*E*)-4-(5,6-dimethyl-3,8,12-trioxo-12-phenyldodec-5-en-1-yl)benzoate (66)**

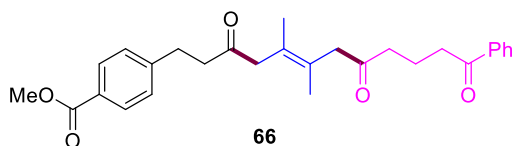

Prepared according to the general procedure D employing  $Ir[dF(CF_3)ppy]_2(dtbbpy)PF_6$  (4.8 mg, 0.004 mmol), dtbbpy (**L1**) (13.9 mg, 0.052 mmol),  $Na_2HPO_4$  (113.5 mg, 0.8 mmol),



NiBr<sub>2</sub>·DME (12.3 mg, 0.04 mmol), 3-[4-(methoxycarbonyl)phenyl]propanoic acid (83.2 mg, 0.4 mmol), DMDC (80.5 mg, 64 μL, 0.60 mmol), a teflon stir bar, 2,3-dimethyl-2-butene (67.3 mg, 95 μL, 0.8 mmol) and *i*PrOAc (8 mL). After 18 h, the reaction mixture was then passed through a short pad of silica gel, with ( EtOAc ) as the eluent ( ~25 mL ), before it was purified by flash chromatography on silica gel to afford the desired ketone. Add the obtained ketone (219.5 mg, 2.0 equiv.) and 4-benzoylbutanoic acid (76.9 mg, 1.0 equiv.) to the above reaction steps. The resulting crude mixture was then allowed to stir at room temperature and irradiated by 450-455 nm LEDs at a distance of 2 cm for 18 h at room temperature. After 18 h, the reaction mixture was then passed through a short pad of silica gel using EtOAc as the eluent (~25 mL). The resulting mixture was concentrated, and the residue was purified by flash chromatography (PE/EA = 3/1) on silica gel to afford **66** (71.7 mg, 0.16 mmol, 40% yield) as a yellow liquid.

**<sup>1</sup>H NMR** (300 MHz, CDCl<sub>3</sub>) δ 8.01 – 7.87 (m, 4H), 7.56 (t, *J* = 7.3 Hz, 1H), 7.45 (t, *J* = 7.5 Hz, 1H), 7.25 (d, *J* = 7.3 Hz, 3H), 3.89 (s, 3H), 3.17 (d, *J* = 9.7 Hz, 2H), 3.01 (t, *J* = 7.0 Hz, 2H), 2.92 (d, *J* = 7.2 Hz, 2H), 2.78 (t, *J* = 7.8 Hz, 2H), 2.56 (t, *J* = 7.0 Hz, 2H), 2.03 – 1.96 (m, 2H), 1.70 – 1.59 (m, 8H).

**<sup>13</sup>C NMR** (126 MHz, CDCl<sub>3</sub>) δ 208.4, 207.5, 199.9, 167.2, 146.8, 137.0, 133.2, 129.9, 128.8, 128.6, 128.3, 128.2, 126.5, 126.1, 52.1, 49.4, 49.2, 42.9, 41.1, 37.6, 29.8, 20.0, 19.9, 18.4.

**HRMS** (ESI) calcd for C<sub>28</sub>H<sub>33</sub>O<sub>5</sub><sup>+</sup> [(M+H)<sup>+</sup>]: calculated 449.2323, found 449.2338.

#### Methyl 4-(5,6-dimethyl-3-oxohept-5-en-1-yl)benzoate (**67**)

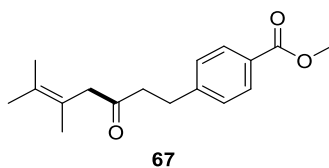

An oven-dried 250 mL flask was evacuated and back-filled with N<sub>2</sub> for three times. After cooling at room temperature added Ir[dF(CF<sub>3</sub>)ppy]<sub>2</sub>(dtbbpy)PF<sub>6</sub> (44.8 mg, 0.04 mmol), dtbbpy (**L1**) (137.5 mg, 0.52 mmol), Na<sub>2</sub>HPO<sub>4</sub> (851.8 mg, 6.0 mmol), NiBr<sub>2</sub>·DME (123.4 mg, 0.4 mmol), 3-[4-(methoxycarbonyl)phenyl]propanoic acid (832.8 mg, 4.0 mmol), DMDC (804.5 mg, 640 μL, 6 mmol), *i*PrOAc (0.05 M, 80 mL) and 2,3-dimethyl-2-butene (673.3 mg, 0.95 mL, 8.0 mmol). The reaction mixture was irradiated with 30 W blue LED lamps (30 W , at approximately 2 cm away

from the light source, Light wavelength 450nm-455nm) with cooling from a fan for 18 h. After 12 h, the reaction mixture was then passed through a short pad of silica gel, with (1:5 EtOAc/hexanes) as the eluent (~150 mL). The resulting mixture was concentrated, and the residue was purified by flash chromatography on silica gel, the residue was isolated by flash chromatography (PE/EA = 10:1) on silica gel to afford **67** (625.1 mg, 0.186 mmol, 62% yield) as a colorless liquid.

**<sup>1</sup>H NMR** (500 MHz, CDCl<sub>3</sub>) δ 7.92 (d, *J* = 8.3 Hz, 2H), 7.22 (d, *J* = 8.3 Hz, 2H), 3.88 (s, 3H), 3.10 (s, 2H), 2.91 (t, *J* = 7.5 Hz, 2H), 2.72 (t, *J* = 7.5 Hz, 2H), 1.67 (s, 3H), 1.62 (s, 3H), 1.59 (s, 3H).

**<sup>13</sup>C NMR** (126 MHz, CDCl<sub>3</sub>) δ 208.1, 167.0, 146.8, 129.8, 128.9, 128.4, 128.1, 120.9, 52.0, 49.4, 42.6, 29.7, 20.8, 20.6, 19.2.

**HRMS** (ESI) calcd for C<sub>17</sub>H<sub>23</sub>O<sub>3</sub><sup>+</sup> [(M+H)<sup>+</sup>]: calculated 275.1642, found 275.1649.

### Scale-up synthesis

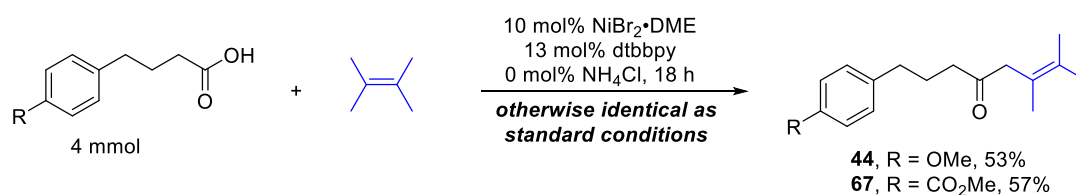

An oven-dried 250 mL flask was evacuated and back-filled with N<sub>2</sub> for three times. After cooling at room temperature added Ir[dF(CF<sub>3</sub>)ppy]<sub>2</sub>(dtbbpy)PF<sub>6</sub> (44.8 mg, 0.04 mmol), dtbbpy (**L1**) (137.5 mg, 0.52 mmol), Na<sub>2</sub>HPO<sub>4</sub> (851.8 mg, 6.0 mmol), NiBr<sub>2</sub>·DME (123.4 mg, 0.4 mmol), 4-(4-methoxyphenyl)butyric acid (776.9 mg, 4.0 mmol) or 4-(4-(methoxycarbonyl)phenyl)butanoic acid (888.9 mg, 4.0 mmol), DMDC (804.5 mg, 640 μL, 6 mmol), *i*PrOAc (0.05 M, 80 mL) and 2,3-dimethyl-2-butene (673.3 mg, 0.95 mL, 8.0 mmol). The reaction mixture was irradiated with 30 W blue LED lamps (30 W, at approximately 2 cm away from the light source, Light wavelength 450nm-455nm) with cooling from a fan for 18 h. After 12 h, the reaction mixture was then passed through a short pad of silica gel, with (1:5 EtOAc/hexanes) as the eluent (~150 mL). The resulting mixture was concentrated, and the residue was purified by flash chromatography on silica gel, the residue was isolated by flash chromatography (PE/EA = 10:1) on silica gel to afford the product as a colorless oil (**44**, 551.0 mg, 53% yield and **67**, 625.1 mg, 57% yield).

## VI. Mechanistic studies

### Radical trap experiment

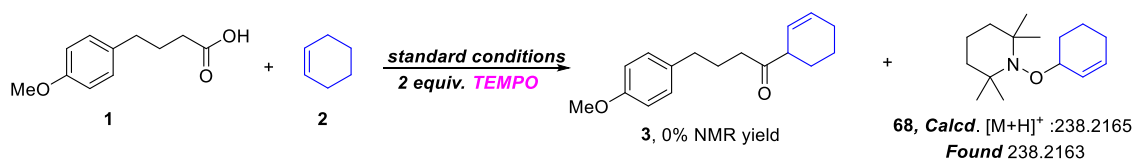

Prepared according to the general procedure A employing Ir[dF(CF<sub>3</sub>)ppy]<sub>2</sub>(dtbbpy)PF<sub>6</sub> (3.6 mg, 0.003 mmol), dtbbpy (**L1**) (20.9 mg, 0.078 mmol), Na<sub>2</sub>HPO<sub>4</sub> (63.9 mg, 0.45 mmol), NH<sub>4</sub>Cl (16 mg, 0.3 mmol), NiBr<sub>2</sub>·DME (18.5 mg, 0.06 mmol), 4-(4-methoxyphenyl)butyric acid (58.2 mg, 0.3 mmol), DMDC (60.3 mg, 48 μL, 0.45 mmol), cyclohexene (49.3 mg, 61 μL, 0.6 mmol), 2,2,6,6-tetramethylpiperidine-N-oxyl (TEMPO, 93.7 mg, 0.6 mmol) and *i*PrOAc (6 mL) were added via a syringe. After 12 h, the reaction mixture was then passed through a short pad of silica gel using EtOAc/hexanes (1/5) as the eluent (~25 mL). The resulting mixture was concentrated and the TEMPO-trapped adduct **68** was detected by HRMS and no cross-coupled product was observed.

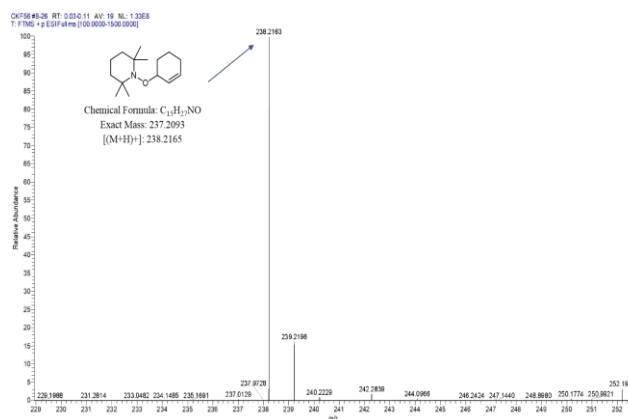

**Figure S1.** HRMS spectra of **68**

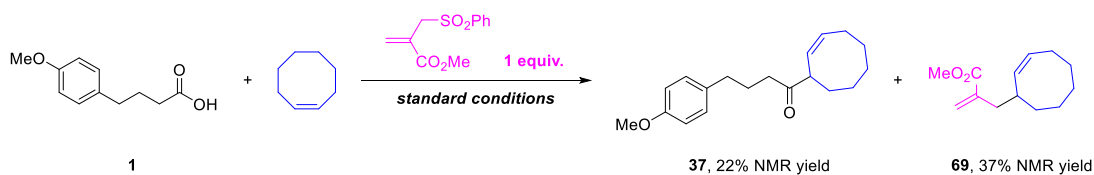

Prepared according to the general procedure A employing Ir[dF(CF<sub>3</sub>)ppy]<sub>2</sub>(dtbbpy)PF<sub>6</sub> (3.6 mg, 0.003 mmol), dtbbpy (**L1**) (20.9 mg, 0.078 mmol), Na<sub>2</sub>HPO<sub>4</sub> (63.9 mg, 0.45 mmol), NH<sub>4</sub>Cl (16.2 mg, 0.3 mmol), NiBr<sub>2</sub>·DME (18.5 mg, 0.06 mmol), 4-(4-methoxyphenyl)butyric acid (58.2 mg, 0.3 mmol), DMDC (60.3 mg, 48 μL, 0.45 mmol), cyclooctene (66.1 mg, 78 μL, 0.6 mmol), methyl 2-((phenylsulfonyl)methyl)acrylate (72.2 mg, 0.3 mmol) and *i*PrOAc (6 mL) were added via a syringe. After 12 h, the reaction mixture was then passed through a short pad of silica gel, with (1/5 EtOAc/hexanes) as the eluent (~25 mL). The resulting mixture was concentrated, and then mesitylene (42 μL, 0.30 mmol) was added as an internal standard. The methyl 2-

((phenylsulfonyl)methyl)acrylate-trapped adduct **69** was detected in 37% NMR yield and cross coupling product was observed in 22% NMR yield.

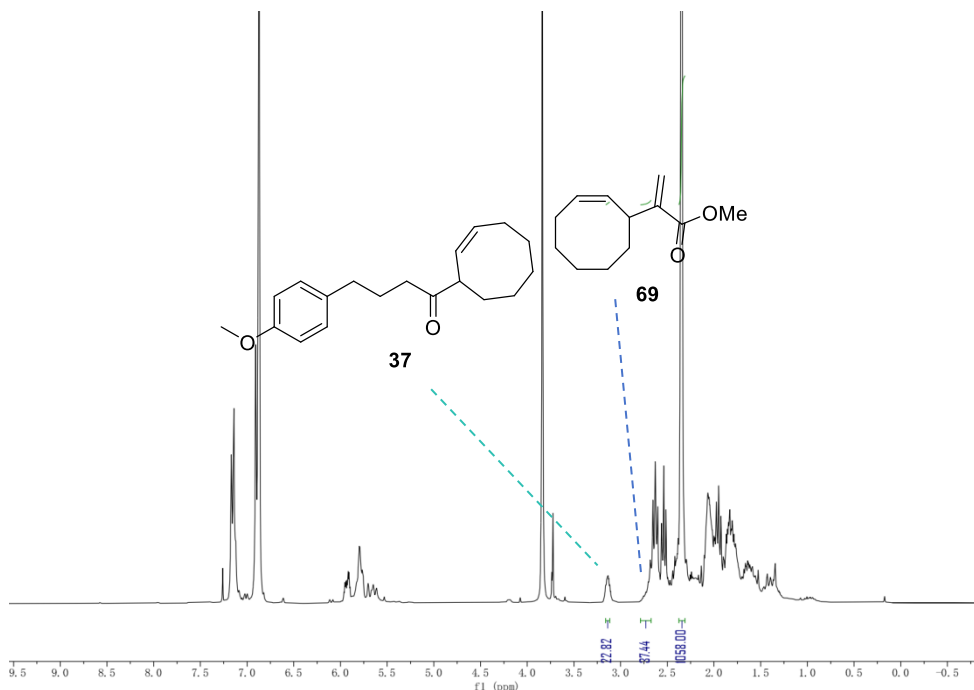

### The evaluation of the role of halogen anion

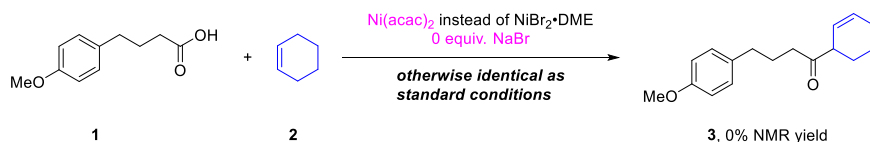

Prepared according to the general procedure A employing Ir[dF(CF<sub>3</sub>)ppy]<sub>2</sub>(dtbbpy)PF<sub>6</sub> (3.6 mg, 0.003 mmol), dtbbpy (**L1**) (20.9 mg, 0.078 mmol), Na<sub>2</sub>HPO<sub>4</sub> (63.9 mg, 0.45 mmol), NH<sub>4</sub>Cl (16.3 mg, 0.3 mmol), Ni(acac)<sub>2</sub> (16.5 mg, 0.06 mmol), 4-(4-methoxyphenyl)butyric acid (58.2 mg, 0.3 mmol), DMDC (60.3 mg, 48 μL, 0.45 mmol), cyclohexene (49.3 mg, 61 μL, 0.6 mmol), *i*PrOAc (6 mL) was added via a syringe. After 12 h, the reaction mixture was then passed through a short pad of silica gel using EtOAc/hexanes (1/5) as the eluent (~25 mL). The resulting mixture was concentrated, and then mesitylene (42 μL, 0.30 mmol) was added as an internal standard. The **3** was not detected by NMR and no cross-coupled product was observed.

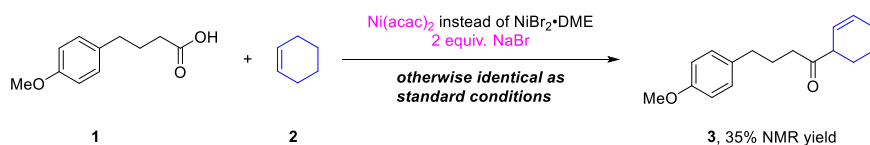

Prepared according to the general procedure A employing Ir[dF(CF<sub>3</sub>)ppy]<sub>2</sub>(dtbbpy)PF<sub>6</sub> (3.6 mg,

0.003 mmol), dtbbpy (**L1**) (20.9 mg, 0.078 mmol), Na<sub>2</sub>HPO<sub>4</sub> (63.9 mg, 0.45 mmol), NH<sub>4</sub>Cl (16.3 mg, 0.3 mmol), Ni(acac)<sub>2</sub> (16.5 mg, 0.06 mmol), 4-(4-methoxyphenyl)butyric acid (58.2 mg, 0.3 mmol), DMDC (60.3 mg, 48  $\mu$ L, 0.45 mmol), NaBr (61.7mg, 0.6mmol), cyclohexene (49.3 mg, 61  $\mu$ L, 0.6 mmol), *i*PrOAc (6 mL) was added via a syringe. After 12 h, the reaction mixture was then passed through a short pad of silica gel, with(1:5 EtOAc/hexanes) as the eluent (~25 mL). The resulting mixture was concentrated, and then mesitylene (42  $\mu$ L, 0.30 mmol) was added as an internal standard. The NMR yield of **3** was found to be 35%.

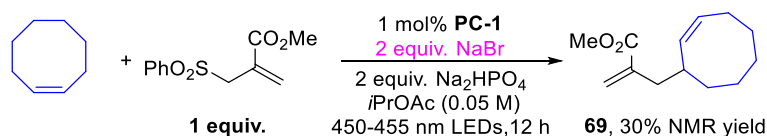

Prepared according to the general procedure A employing Ir[dF(CF<sub>3</sub>)ppy]<sub>2</sub>(dtbbpy)PF<sub>6</sub> (3.6 mg, 0.003 mmol), Na<sub>2</sub>HPO<sub>4</sub> (63.9 mg, 0.45 mmol), NaBr (61.7mg, 0.6mmol), methyl 2-((*p*-henylsulfonyl)methyl)acrylate (72 mg, 0.3 mmol), cyclooctene (66.1 mg, 78  $\mu$ L, 0.6 mmol) and *i*PrOAc (6 mL) was added via a syringe. After 12 h, the reaction mixture was then passed through a short pad of silica gel using EtOAc/hexanes (1/5) as the eluent (~25 mL). The resulting mixture was concentrated, and then mesitylene (42  $\mu$ L, 0.30 mmol) was added as an internal standard. The NMR yield of **69** products was 30% in the presence of NaBr.

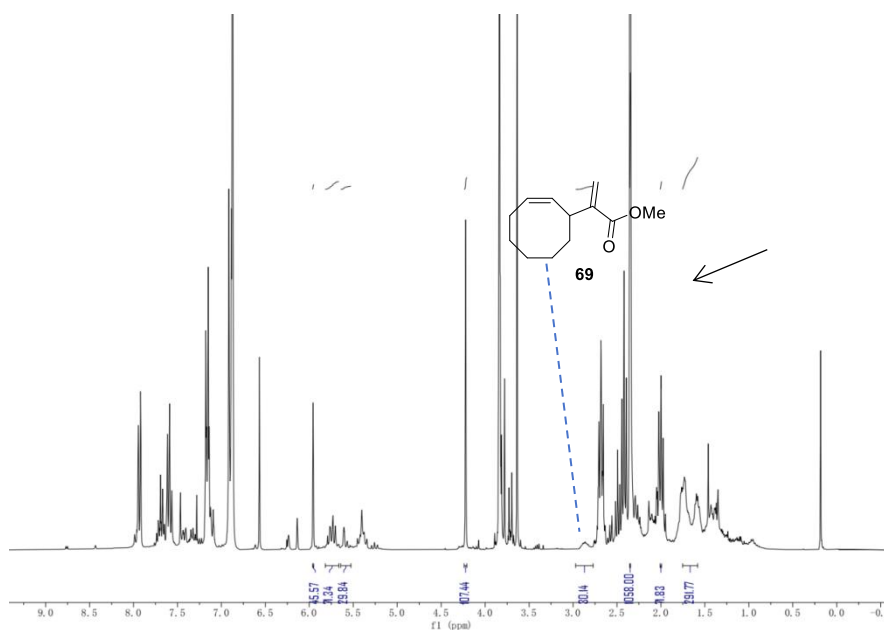

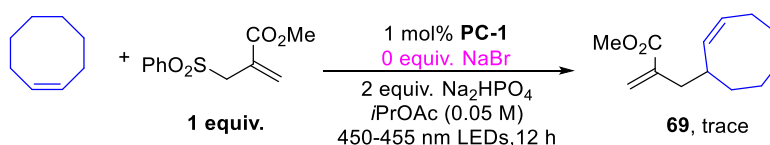

Prepared according to the general procedure A employing Ir[dF(CF<sub>3</sub>)ppy]<sub>2</sub>(dtbbpy)PF<sub>6</sub> (3.6 mg, 0.003 mmol), Na<sub>2</sub>HPO<sub>4</sub> (63.9 mg, 0.45 mmol), no NaBr, methyl 2-((phenylsulfonyl)methyl)acrylate (72 mg, 0.3 mmol), cyclooctene (66.1 mg, 78 μL, 0.6 mmol) and *i*PrOAc (6 mL) was added via a syringe. After 12 h, the reaction mixture was then passed through a short pad of silica gel using EtOAc/hexanes (1/5) as the eluent (~25 mL). The resulting mixture was concentrated, and then Mesitylene (42 μL, 0.30 mmol) was added as an internal standard. No product was detected through <sup>1</sup>H NMR analysis.

### Fluorescence quenching (Stern-Volmer) studies<sup>1</sup>

Emission intensities were recorded using F-7000 FL spectrophotometer. All Ir[dF(CF<sub>3</sub>)ppy]<sub>2</sub>(dtbbpy)PF<sub>6</sub> solutions were excited at 400 nm and the emission intensity was collected at 456 ~ 600 nm. In a typical experiment, to a 1.0 x 10<sup>-5</sup> M solution of Ir[dF(CF<sub>3</sub>)ppy]<sub>2</sub>(dtbbpy)PF<sub>6</sub> in *i*PrOAc was added the appropriate amount of quencher in a screw-top 1.0 cm quartz cuvette. the emission of the sample was collected.

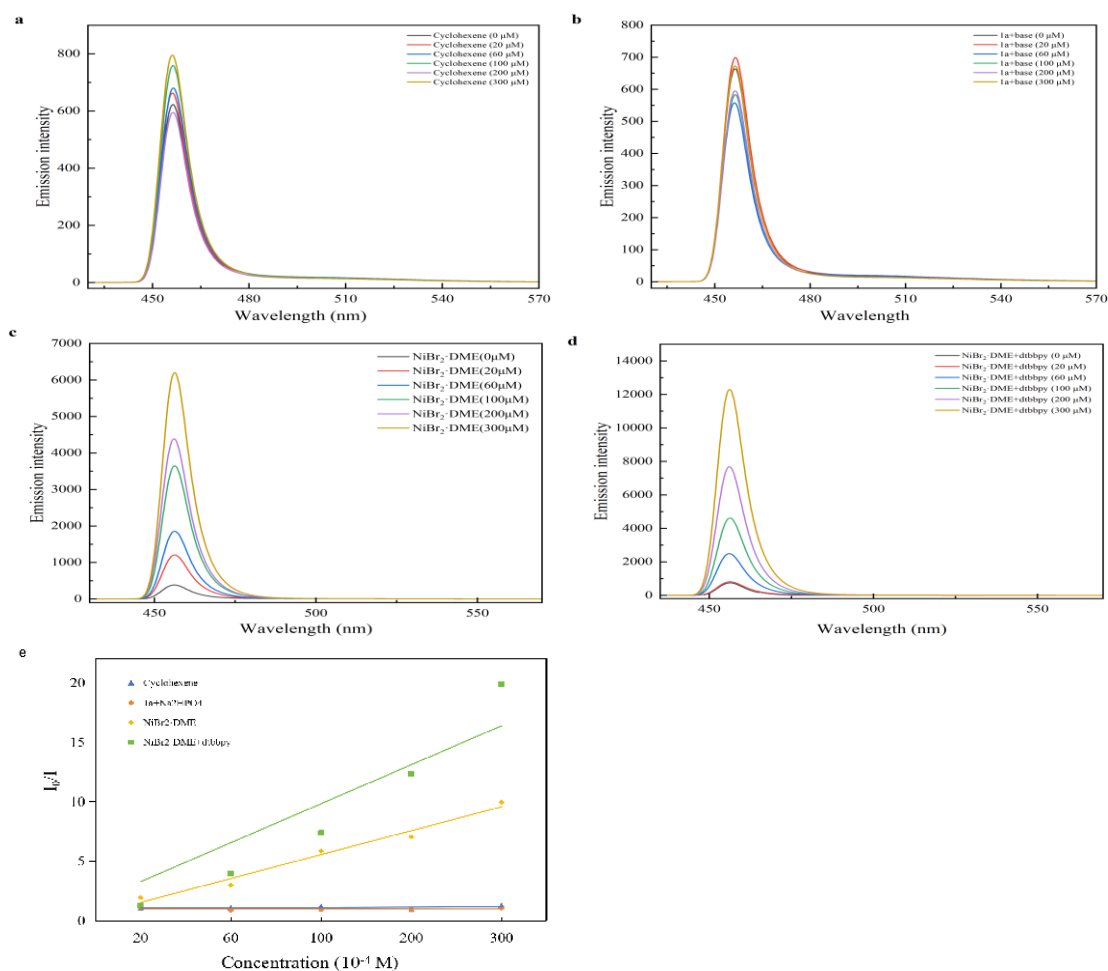

**Figure S2.** (a) Stern–Volmer quenching with cyclohexene. (b) Stern–Volmer quenching with 1a and  $\text{Na}_2\text{HPO}_4$ . (c) Stern–Volmer quenching with  $\text{NiBr}_2 \cdot \text{DME}$ . (d) Stern–Volmer quenching with  $\text{NiBr}_2 \cdot \text{DME} + \text{dtbbpy}$ . (e) Stern–Volmer analysis.

### Light on-off experiment<sup>2</sup>

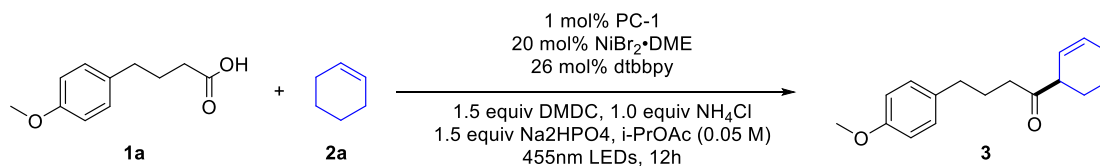

Prepared according to the general procedure A employing  $\text{Ir}[\text{dF}(\text{CF}_3)\text{ppy}]_2(\text{dtbbpy})\text{PF}_6$  (3.6 mg, 0.003 mmol), dtbbpy (**L1**) (20.9 mg, 0.078 mmol),  $\text{Na}_2\text{HPO}_4$  (63.9 mg, 0.45 mmol),  $\text{NH}_4\text{Cl}$  (16 mg, 0.3 mmol),  $\text{NiBr}_2 \cdot \text{DME}$  (18.5 mg, 0.06 mmol), 4-(4-methoxyphenyl)butyric acid (58.2 mg, 0.3 mmol), DMDC (60.3 mg, 48  $\mu$ L, 0.45 mmol), a teflon stir bar, cyclohexene (49.3 mg, 61  $\mu$ L, 0.6 mmol) and *i*PrOAc (6 mL). The resulting crude mixtures were then allowed to stir at room temperature and irradiated by 450–455 nm LEDs at a distance of 2 cm for a sequential light on/off

experiment was conducted. Initial irradiation for 2 hours yielded 11%. Subsequent reaction in the dark for 2 hours exhibited no increase in yield, maintaining 11%. Upon re-illumination for 2 hours, the yield increased to 16%. A following 2-hour dark period again showed no significant change, with the yield remaining at 17%. This pattern continued: illumination (2 h) raised the yield to 24%, followed by dark conditions (2 h) with no increase (24%); illumination (2 h) to 33%, dark (2 h) stable at 33%; illumination (2 h) to 43%, dark (2 h) stable at 43%; and finally, illumination (2 h) to 56%, followed by dark reaction (2 h) yielding no further increase (56%). The reaction yields were determined by  $^1\text{H}$  NMR analysis with mesitylene as an internal standard.

| entry | light on and off conditions | yield (%) |
|-------|-----------------------------|-----------|
| 1     | on 2 hours                  | 11%       |
| 2     | off 2 hours                 | 11%       |
| 3     | on 2 hours                  | 16%       |
| 4     | off 2 hours                 | 17%       |
| 5     | on 2 hours                  | 24%       |
| 6     | off 2 hours                 | 24%       |
| 7     | on 2 hours                  | 33%       |
| 8     | off 2 hours                 | 33%       |
| 9     | on 2 hours                  | 43%       |
| 10    | off 2 hours                 | 43%       |
| 11    | on 2 hours                  | 56%       |
| 12    | off 2 hours                 | 56%       |

**Table S8.** Light on-off experiment



## VII. Supplementary References

1. X. Xi, Y. Luo, W. Li, M. Xu, H. Zhao, Y. Chen, S. Zheng, X. Qi and W. Yuan, *Angew. Chem. Int. Ed.*, 2022, **61**, e202114731.
2. X. Wang, R. Yang, B. Zhu, Y. Liu, H. Song, J. Dong and Q. Wang, *NAT COMMUN*, 2023, **14**, 2951.

## VIII. NMR spectra

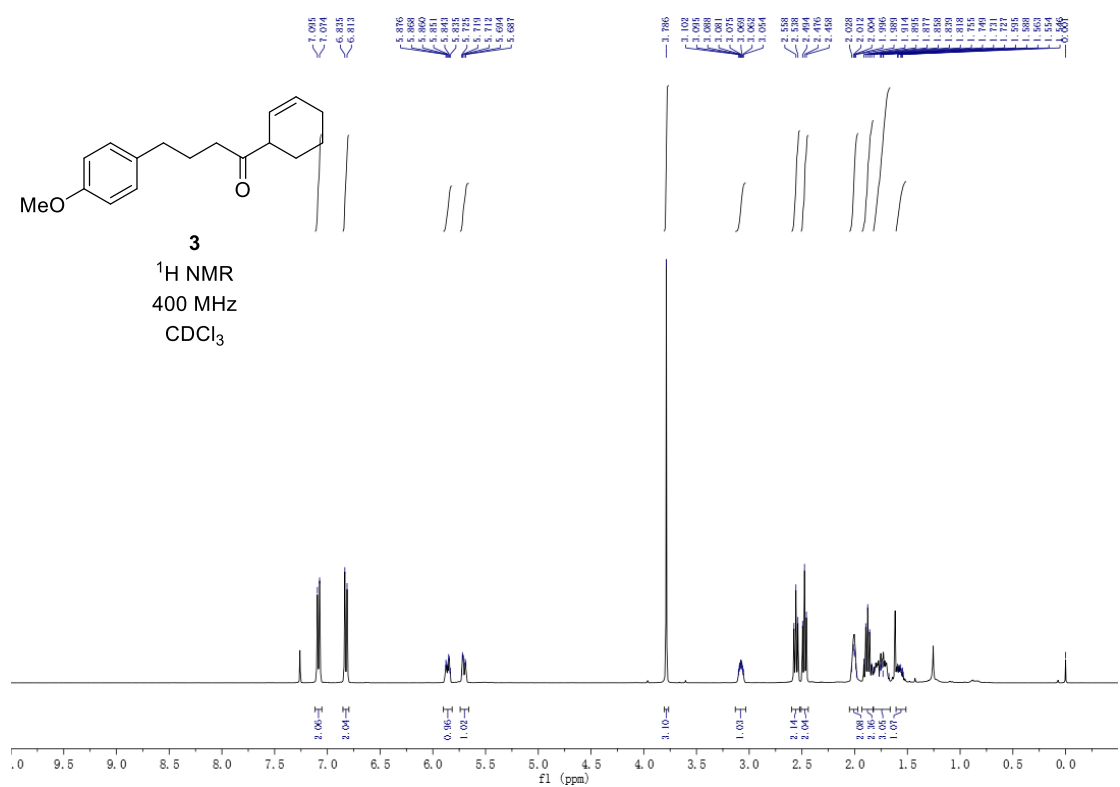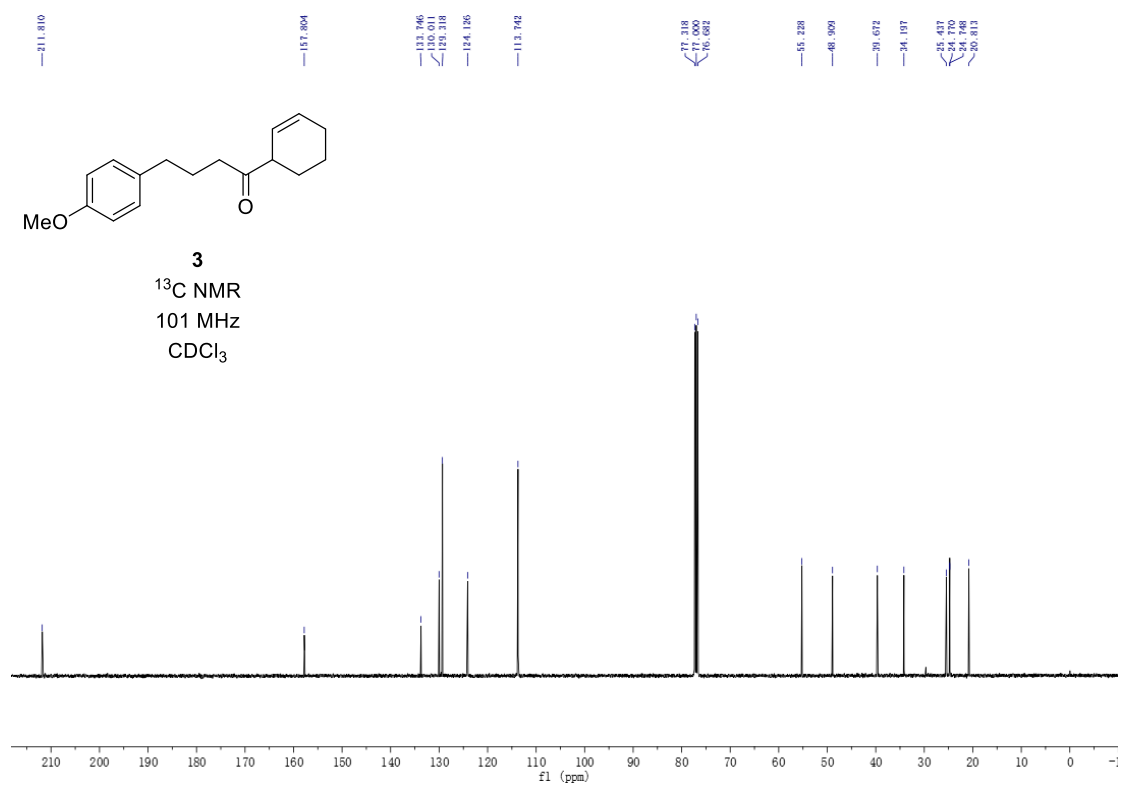

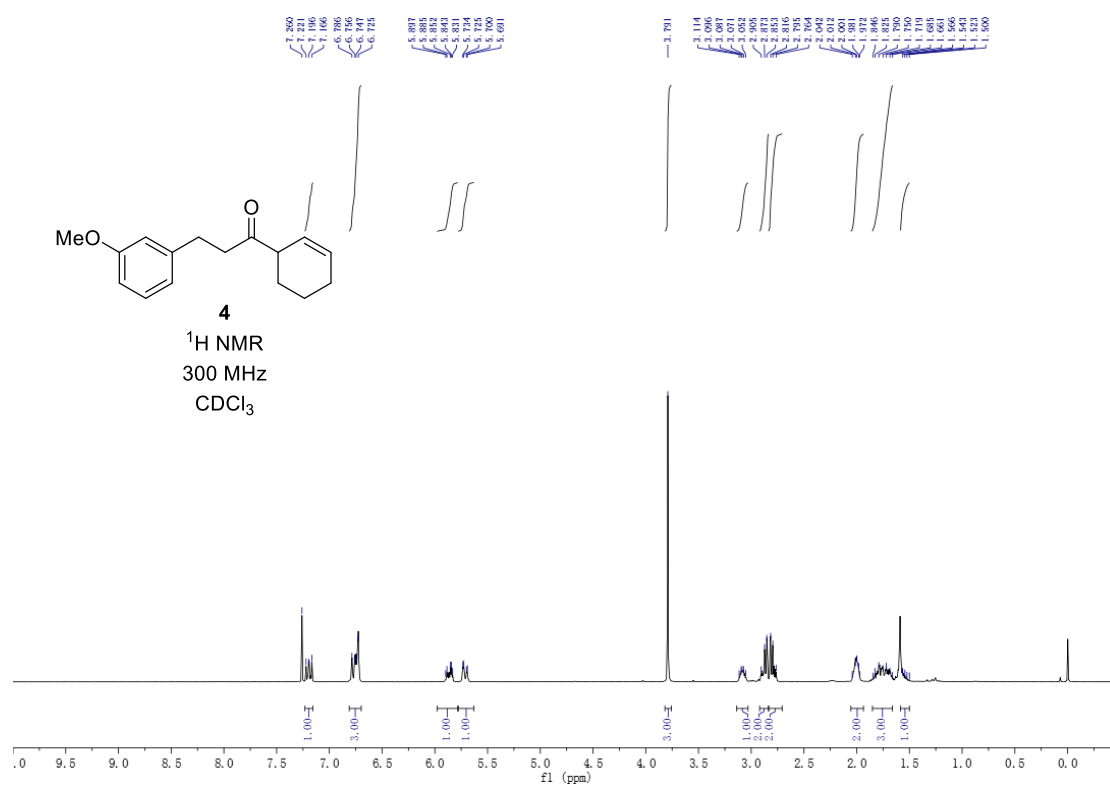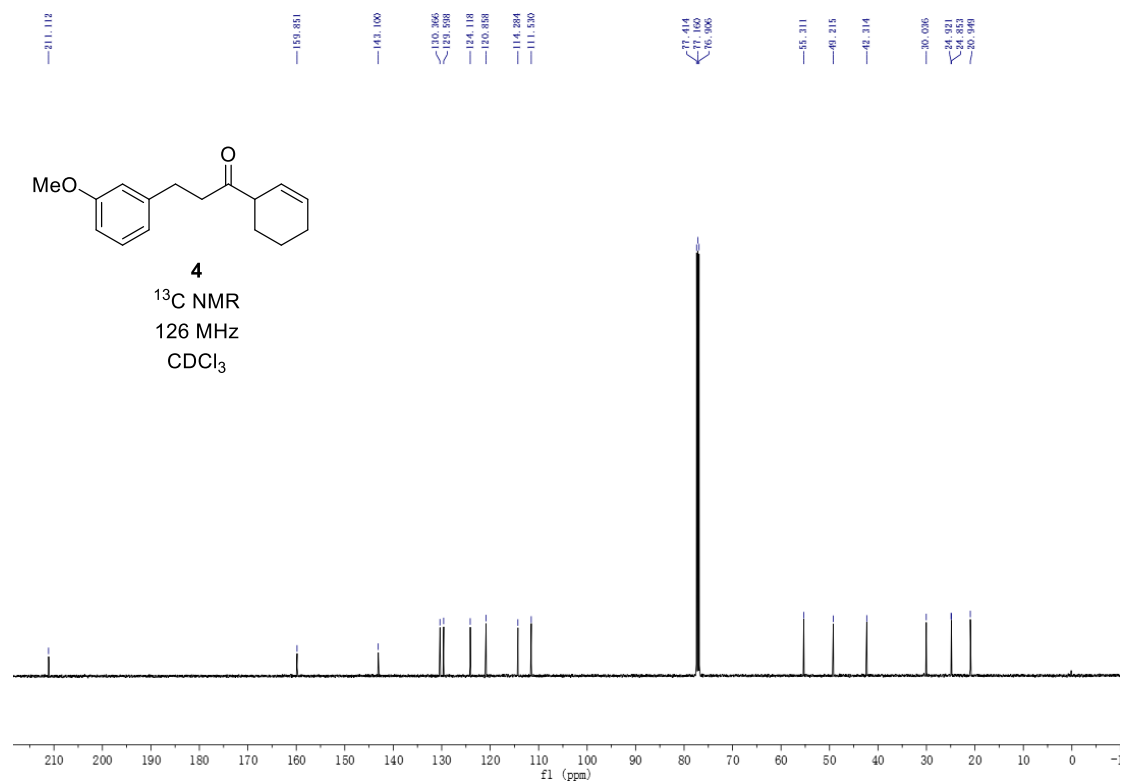

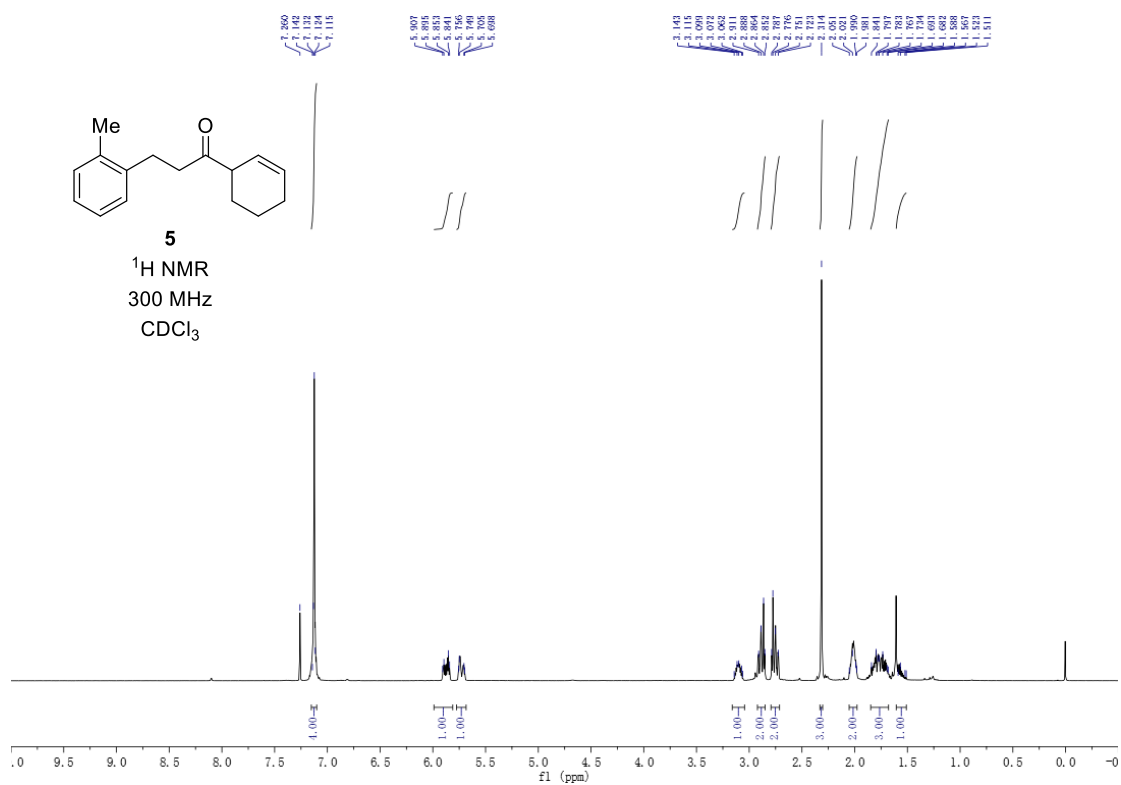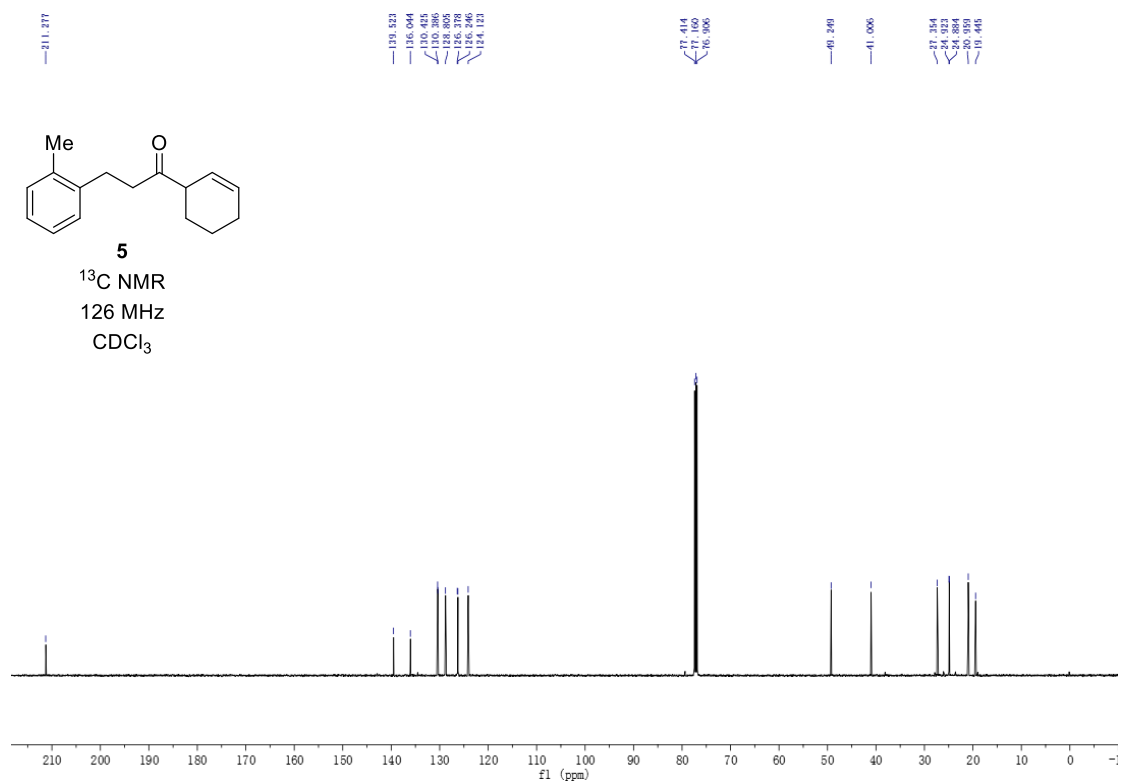

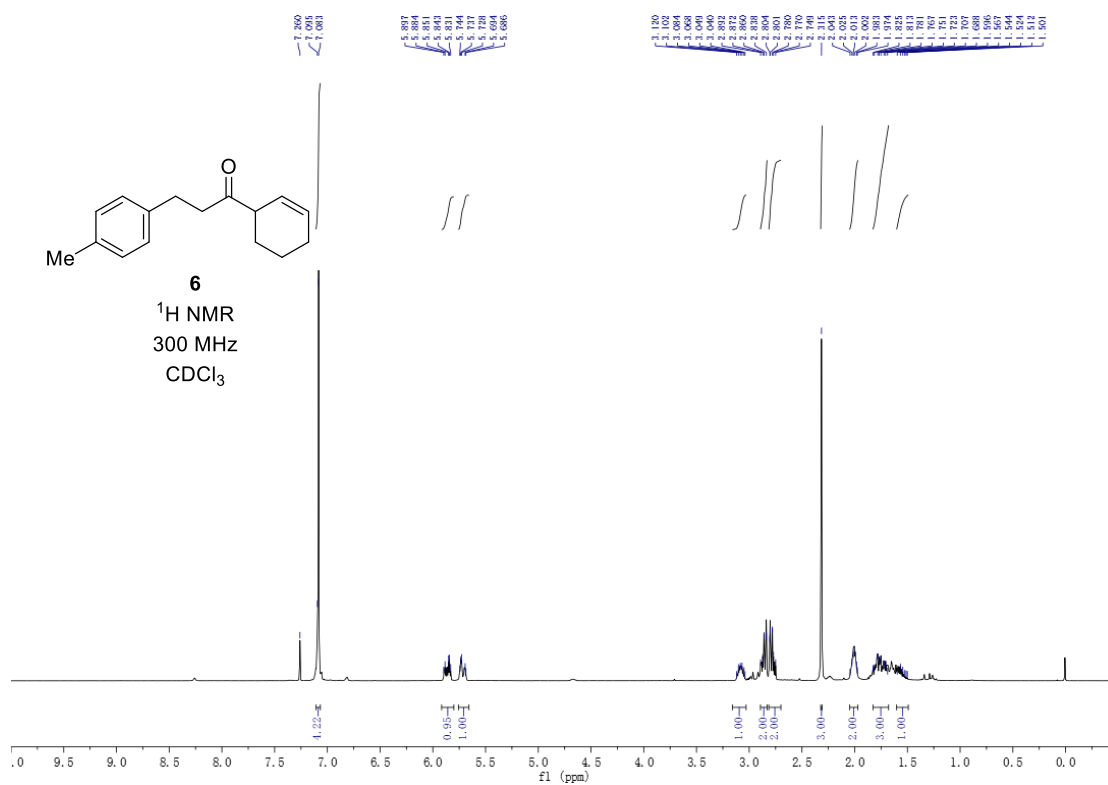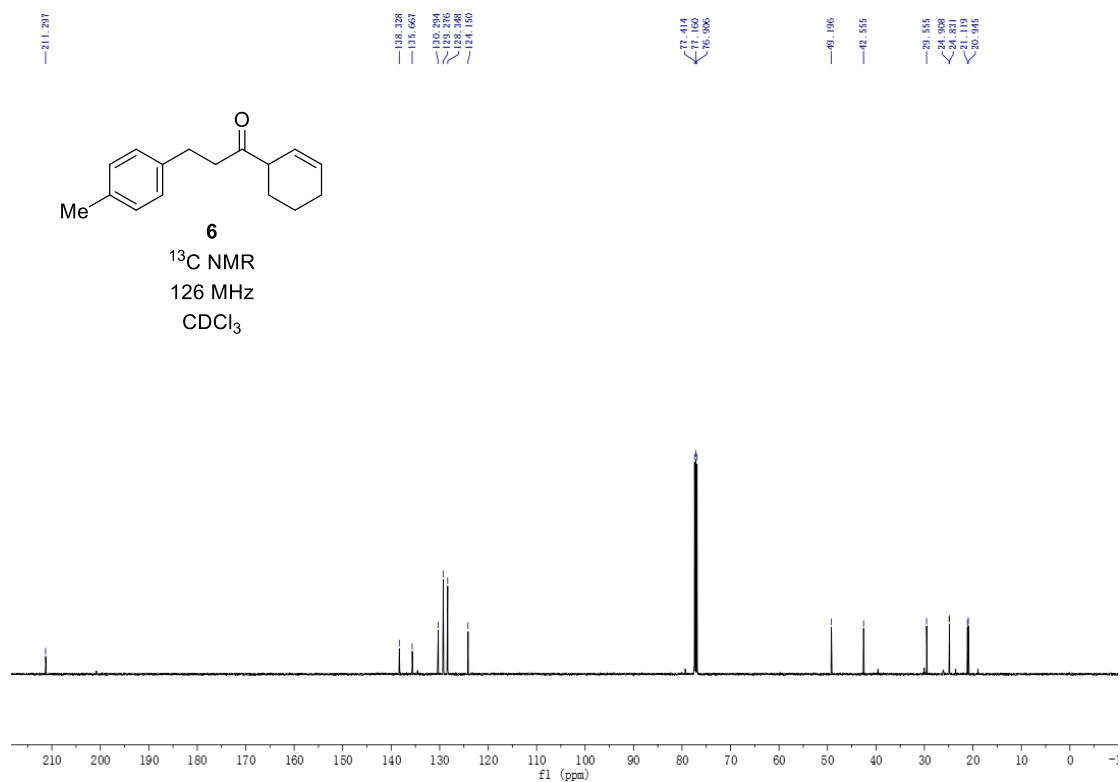

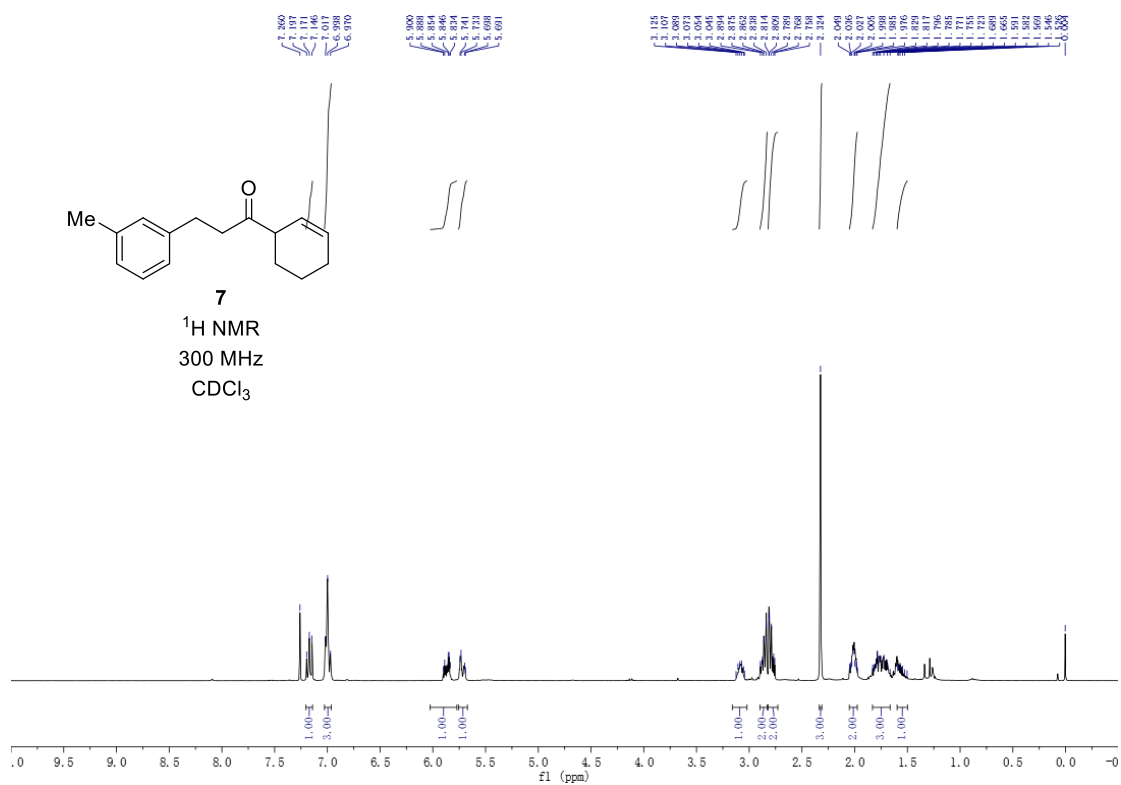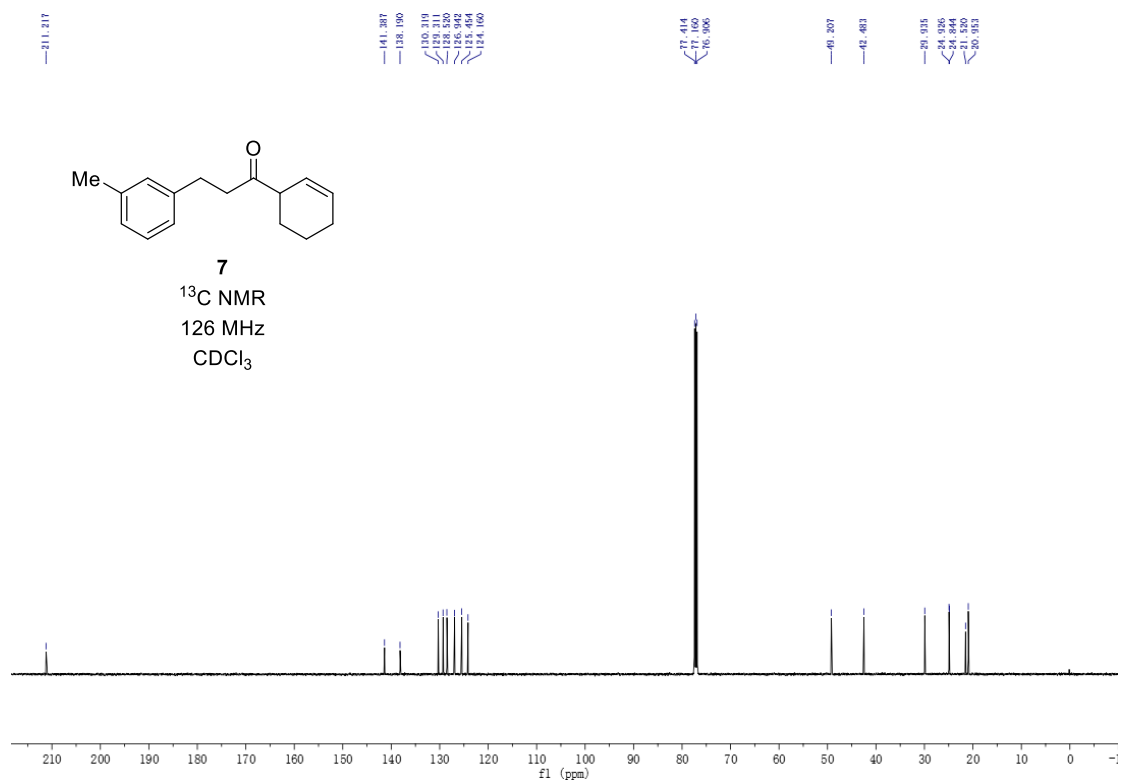

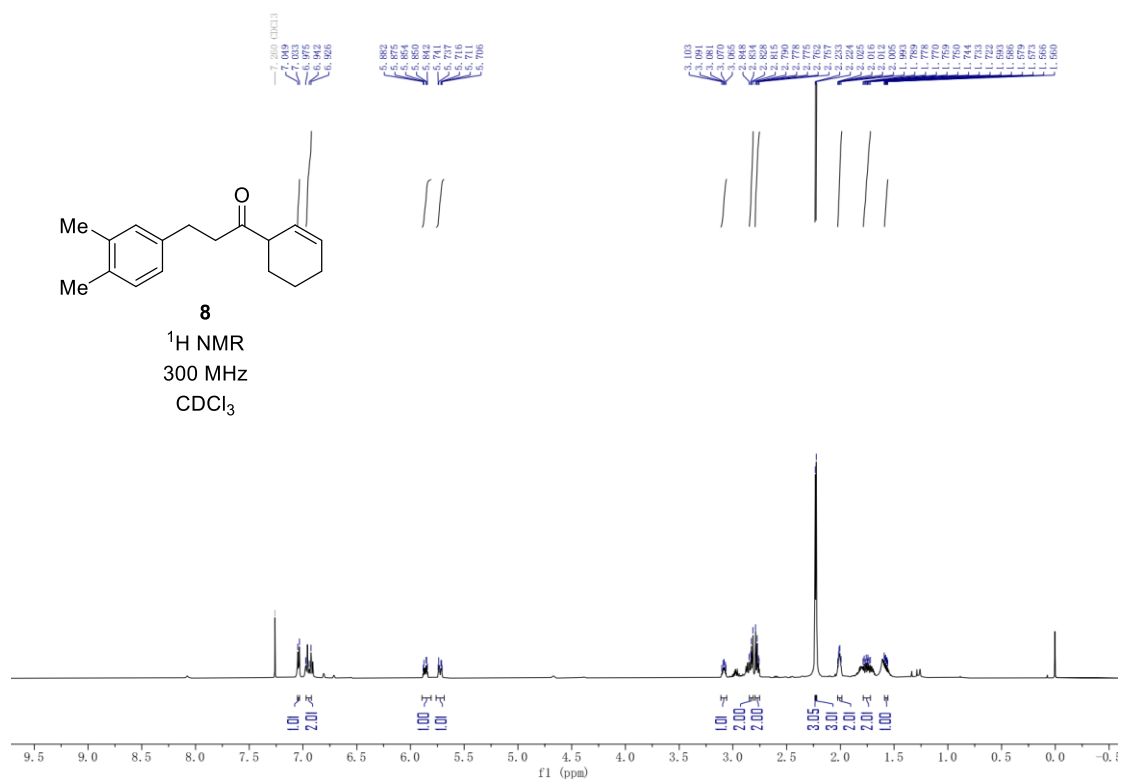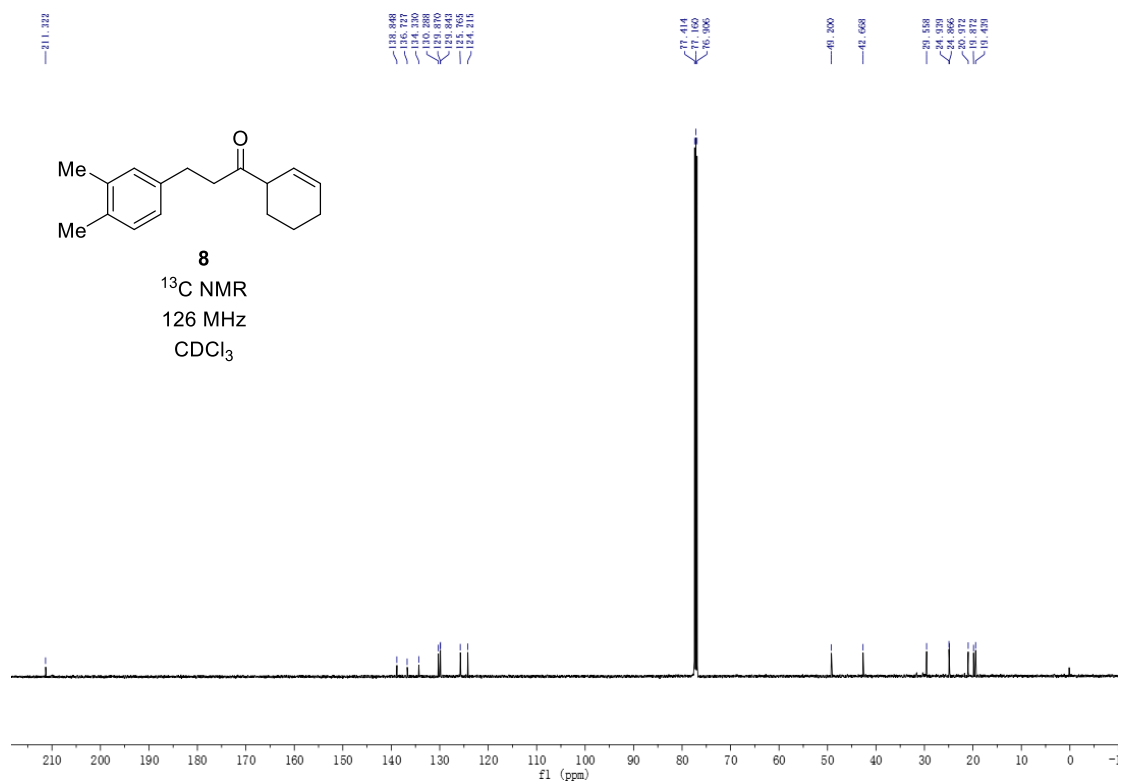

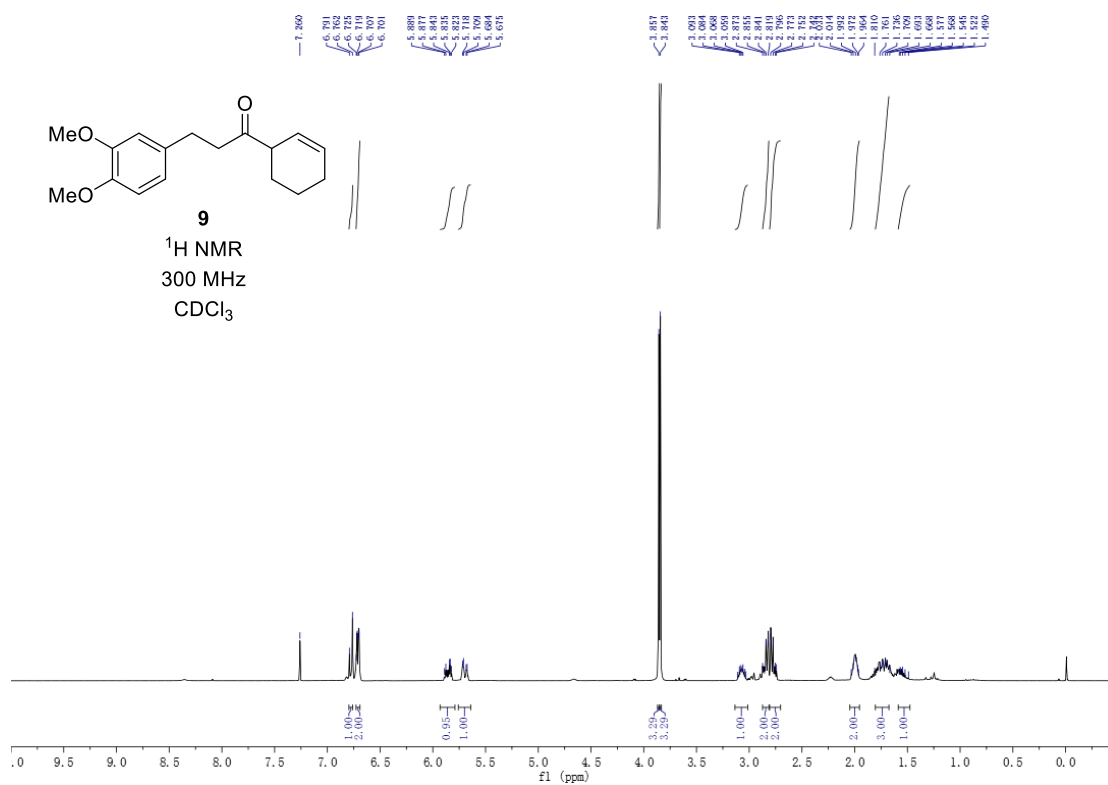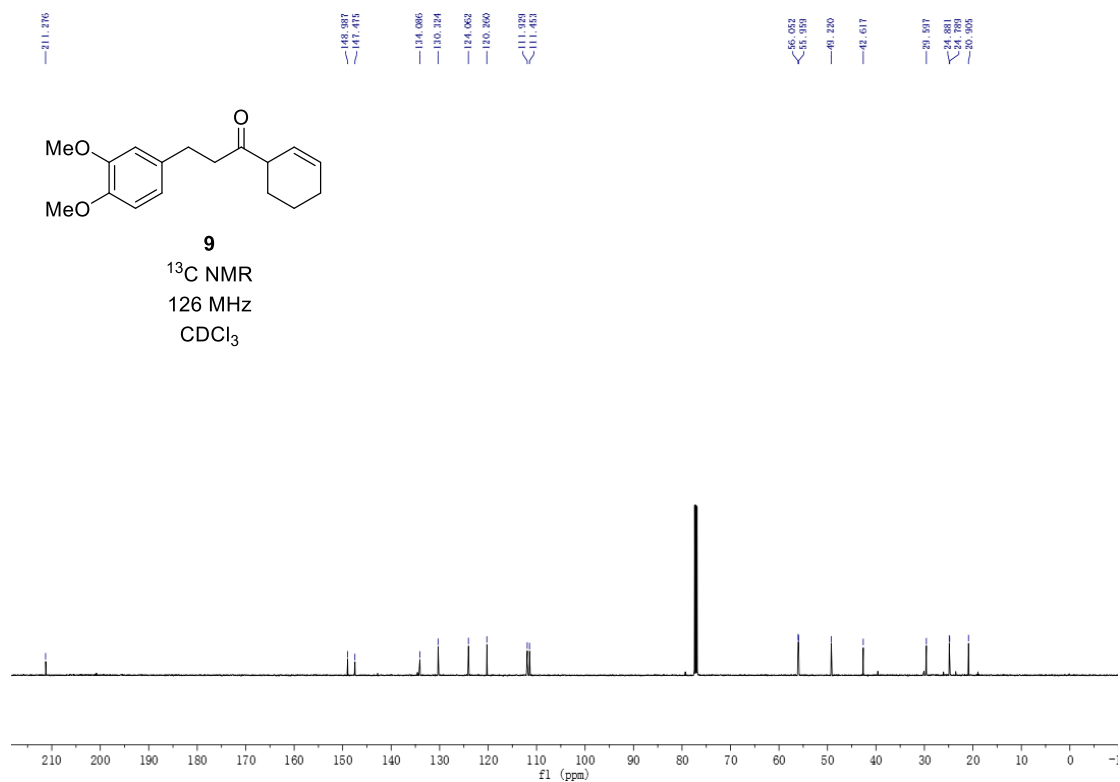



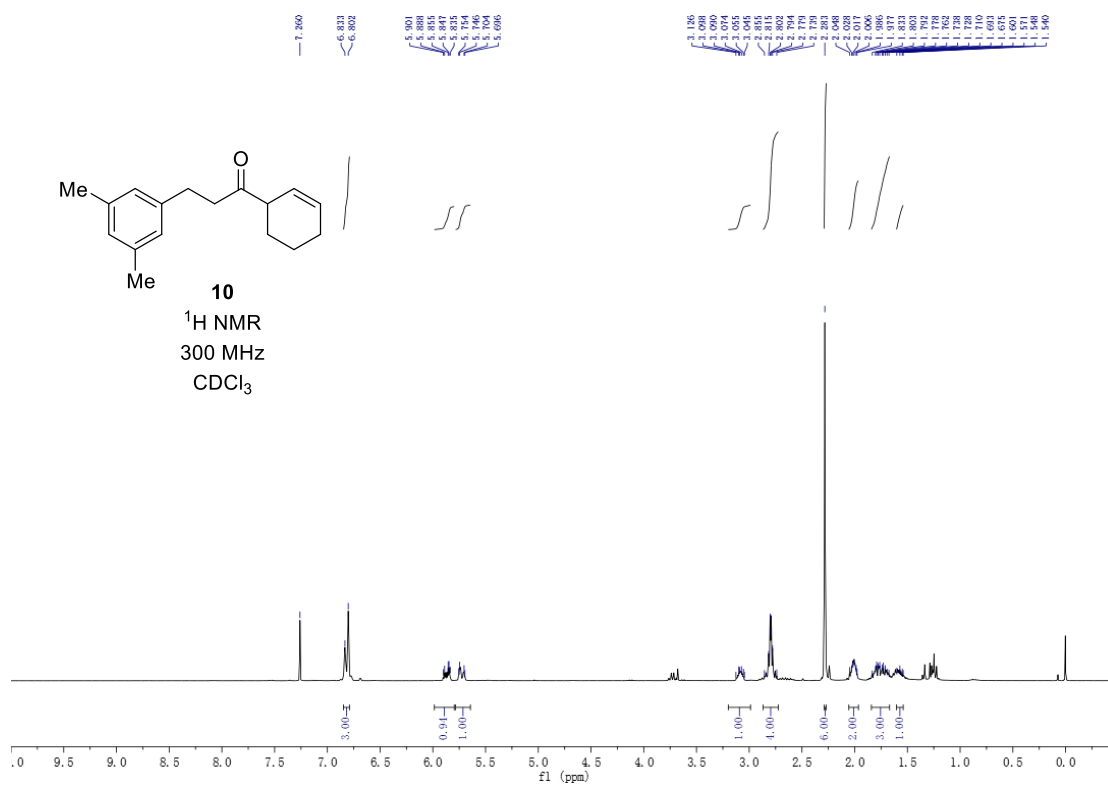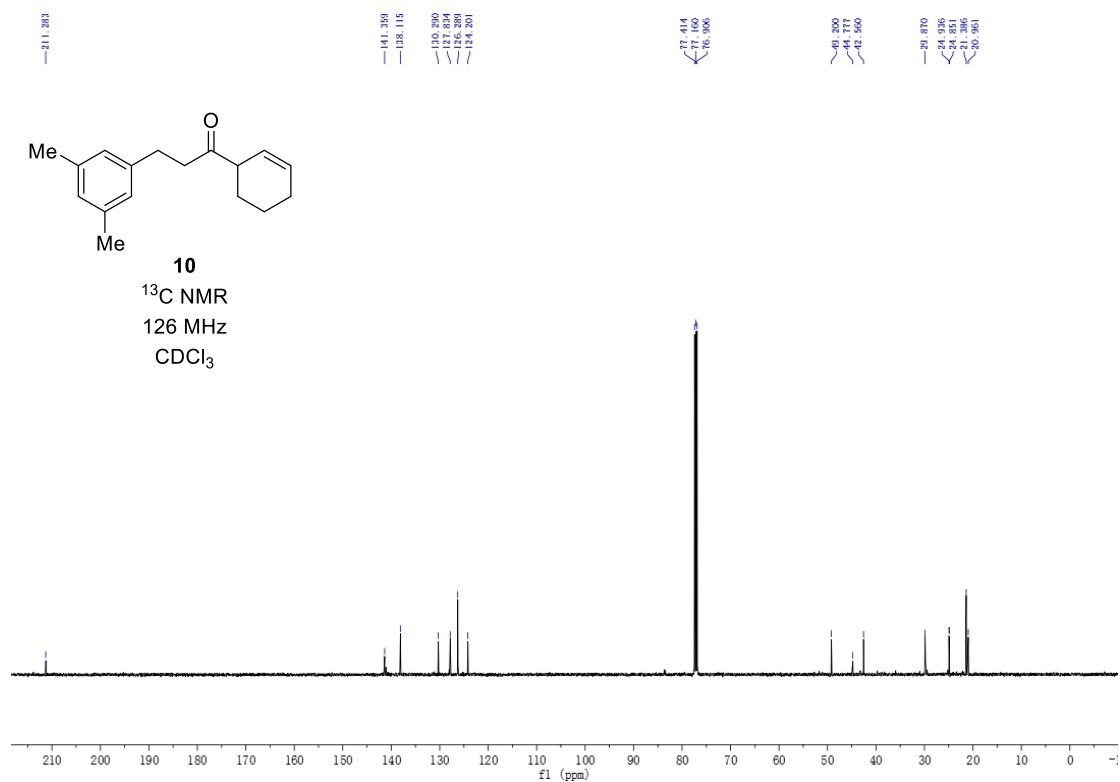

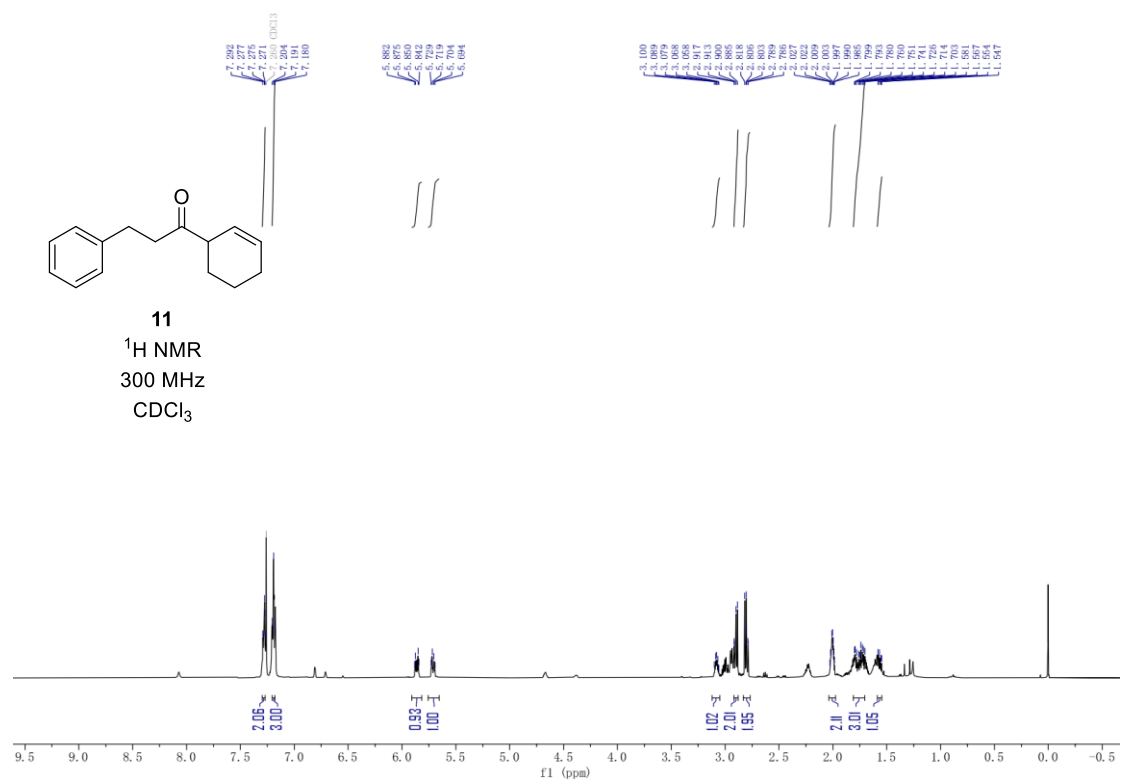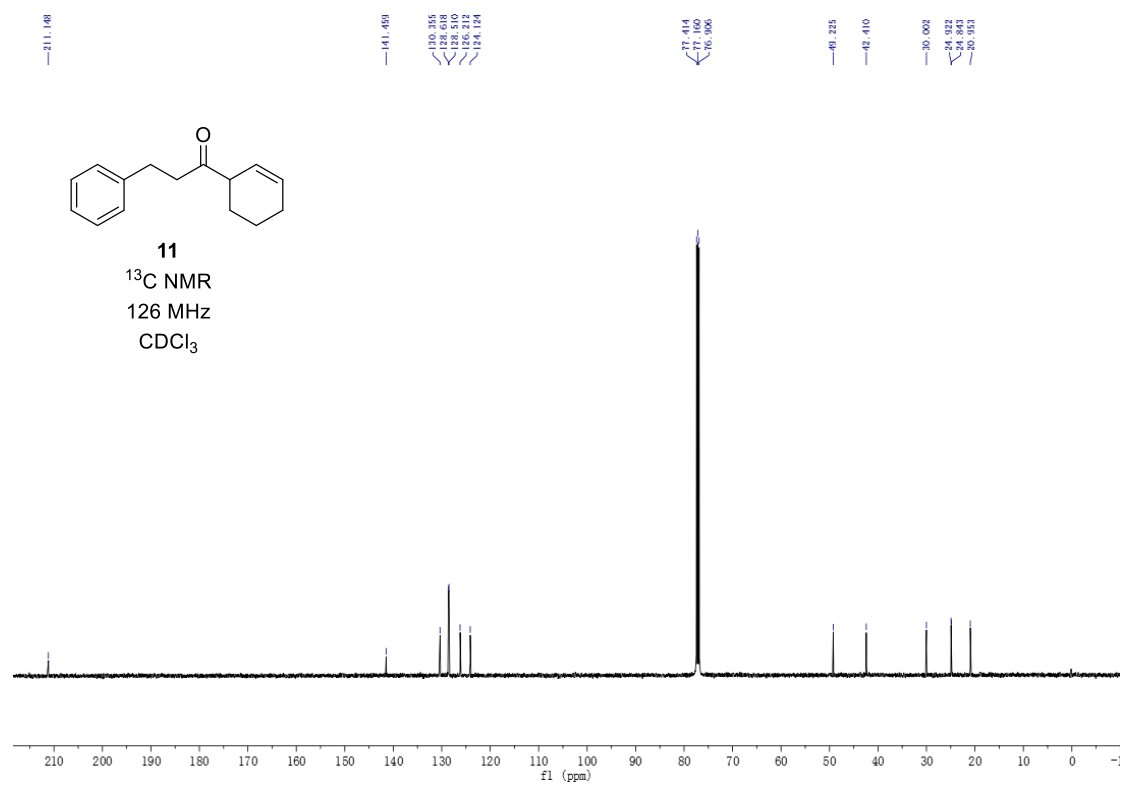

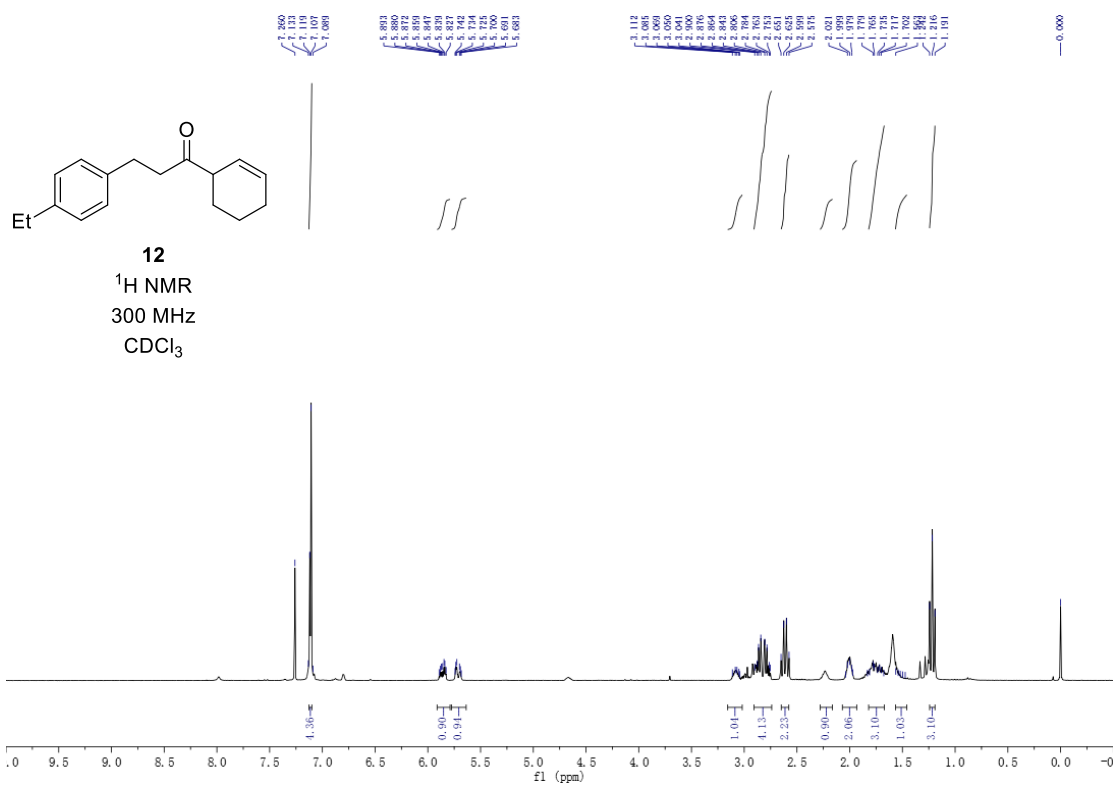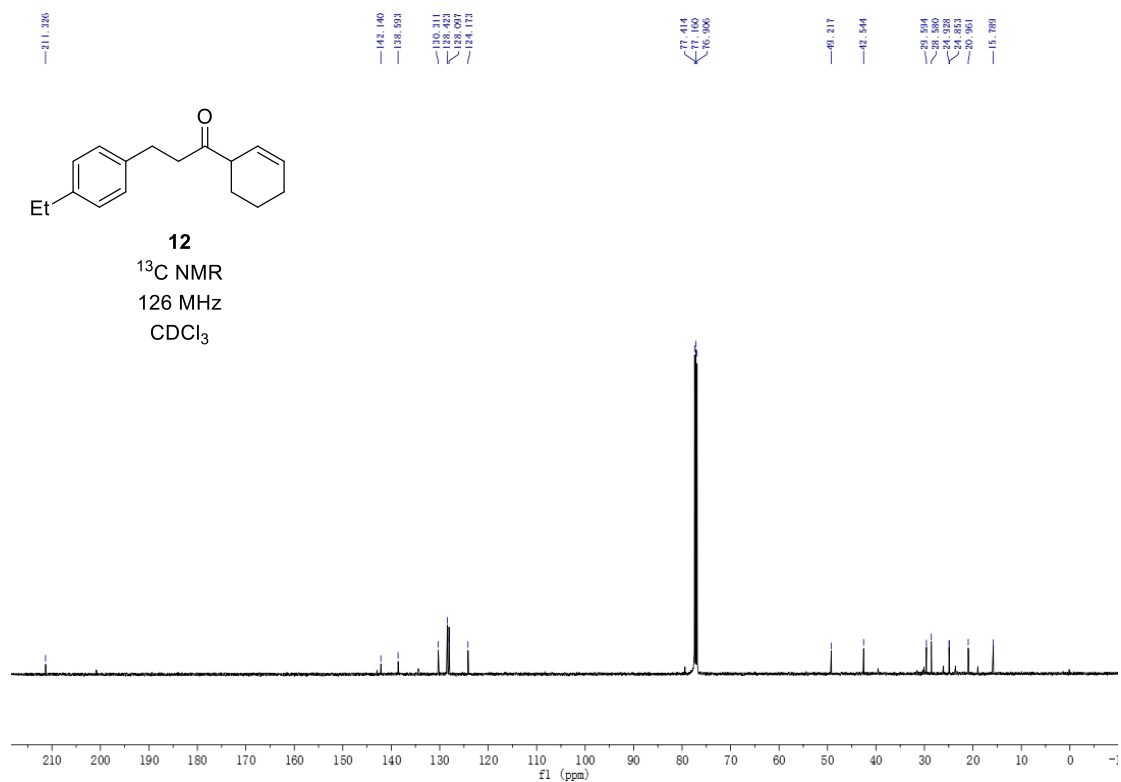



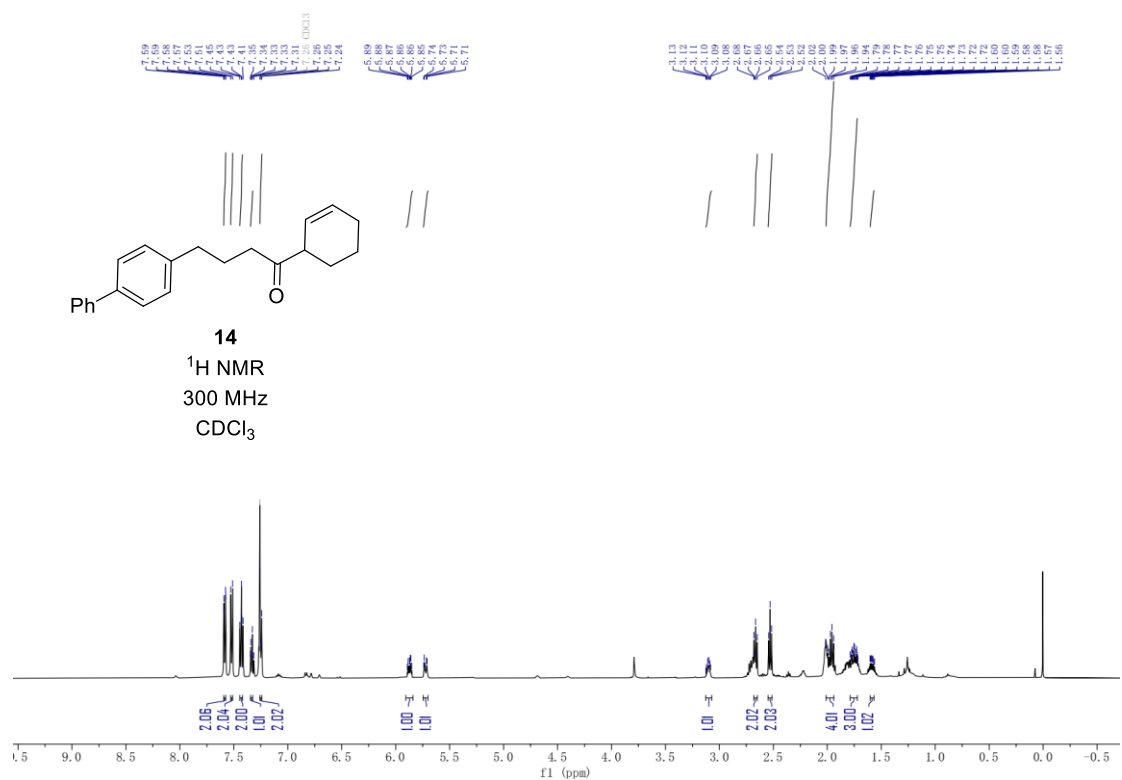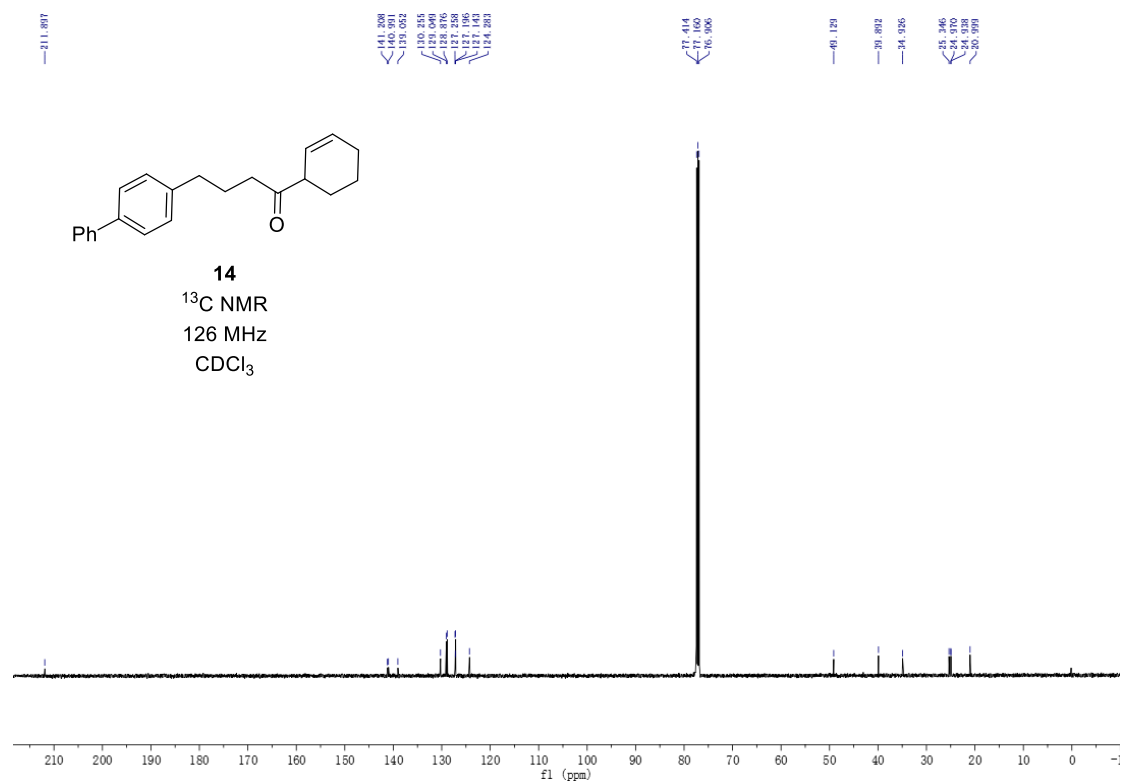

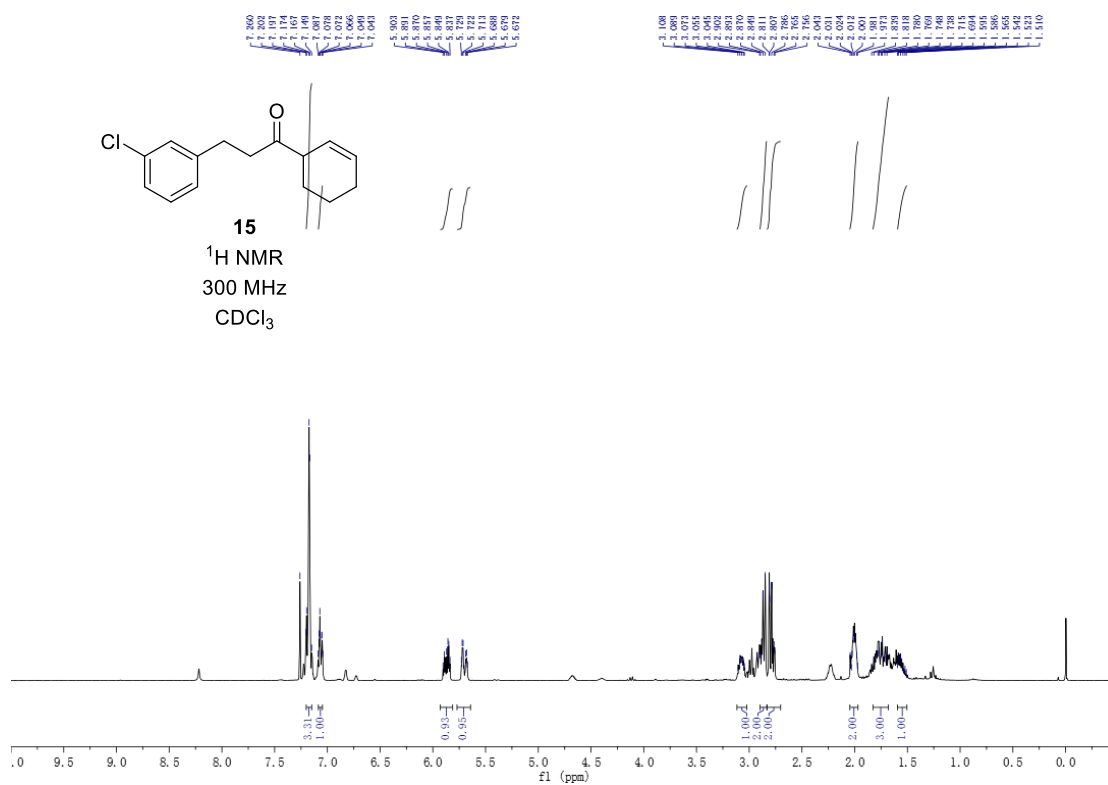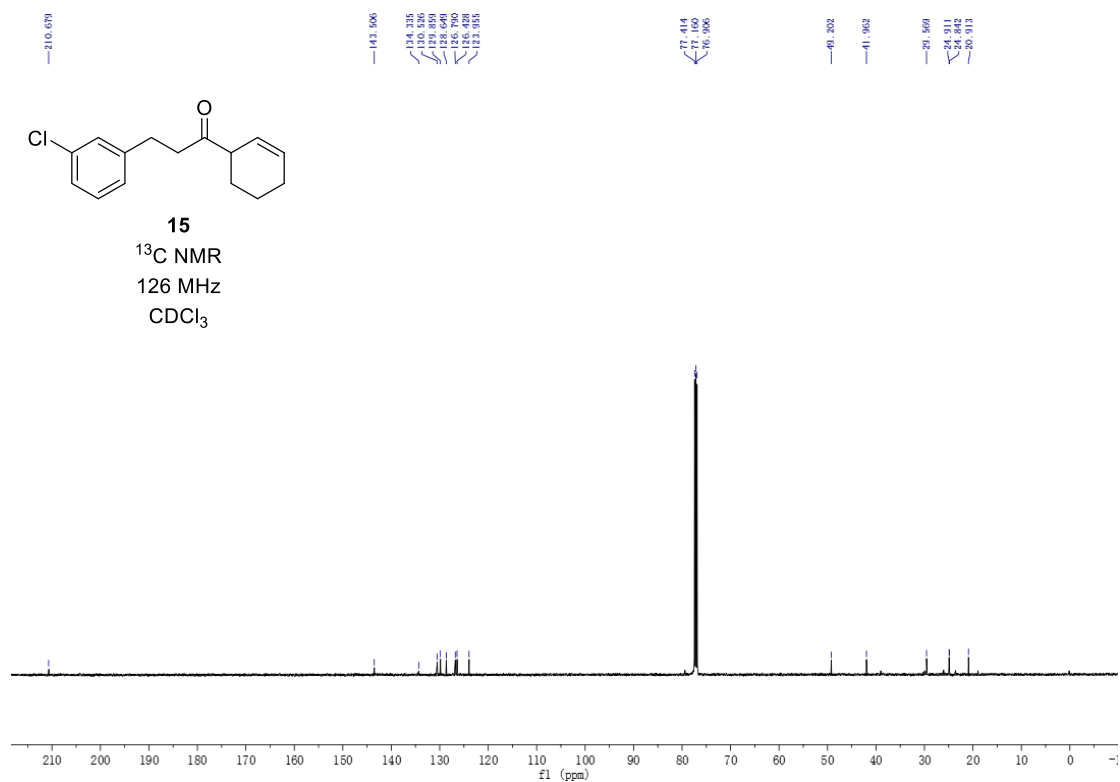

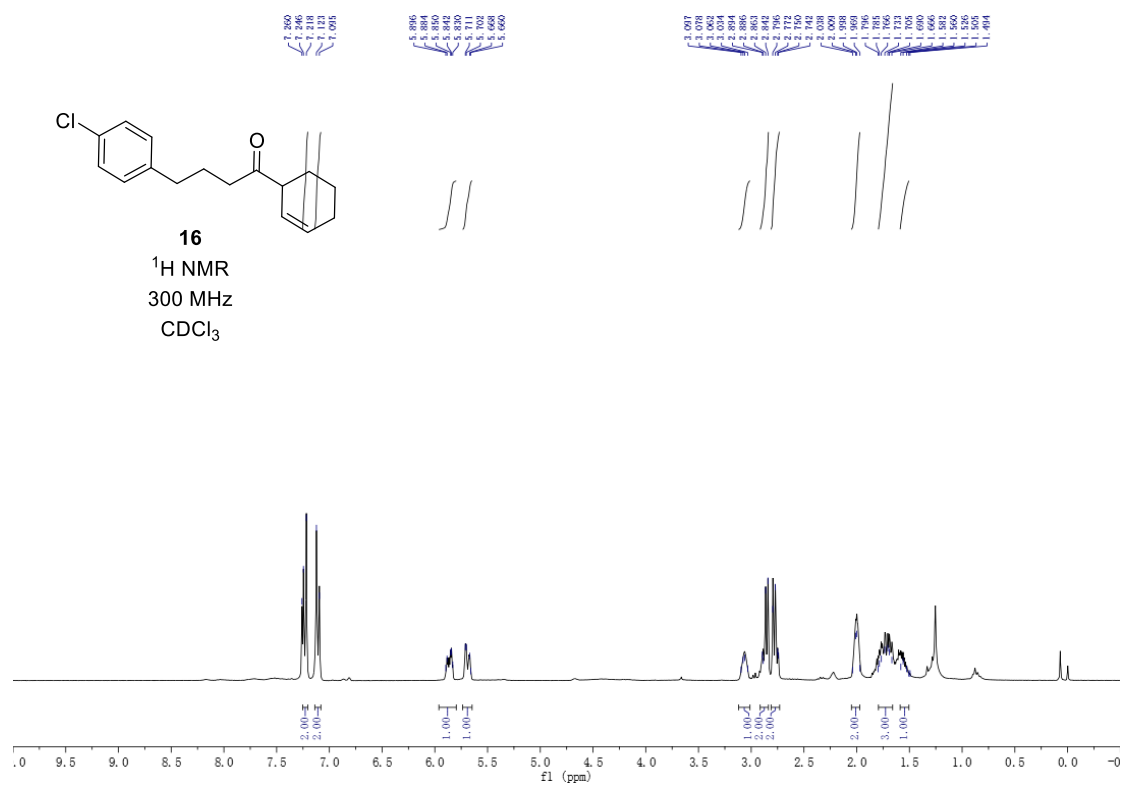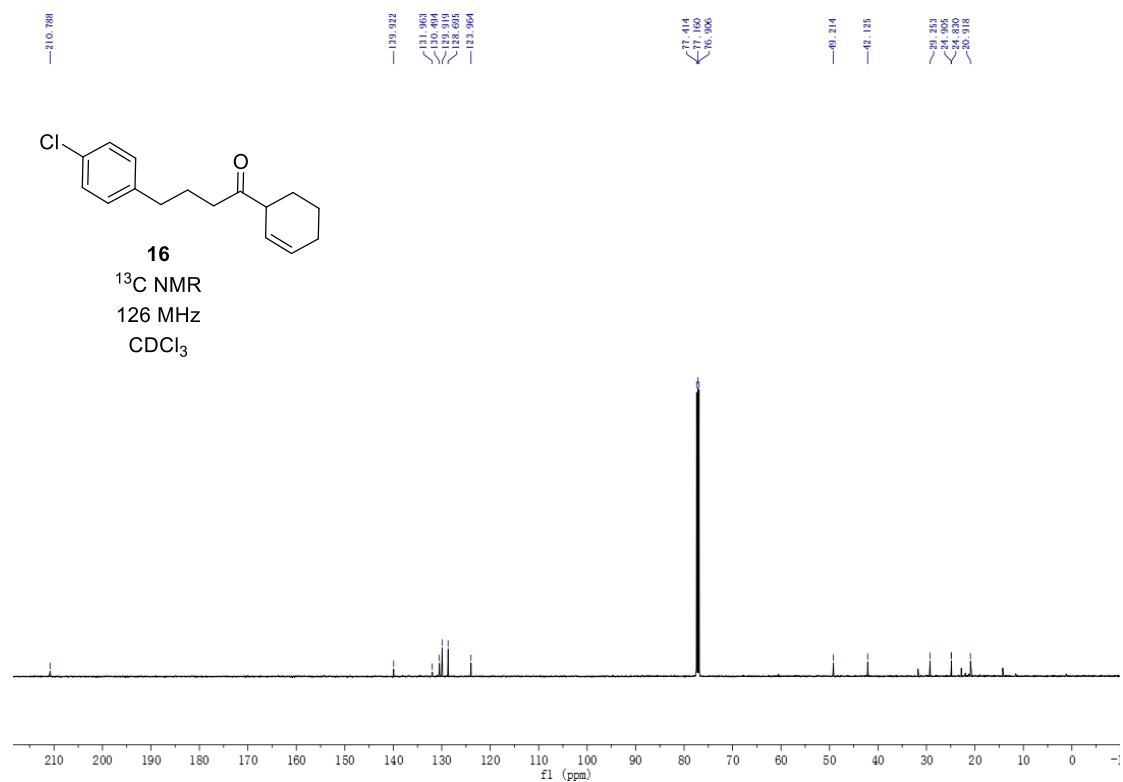

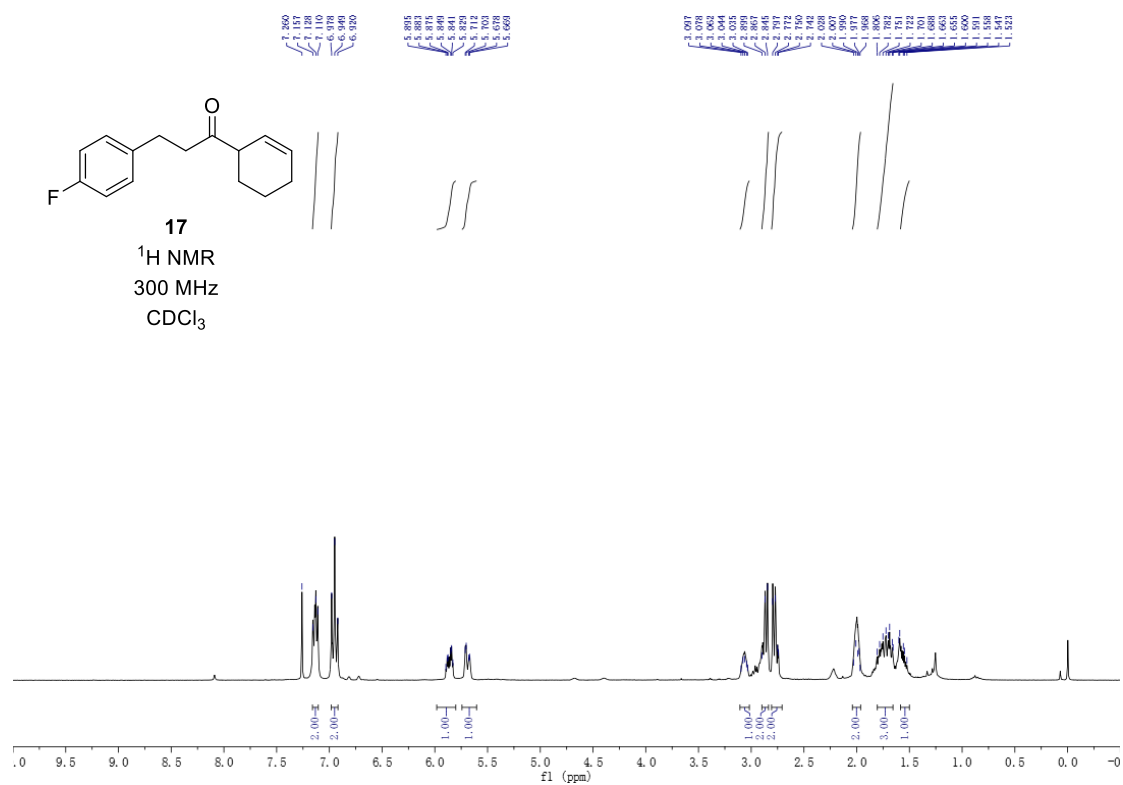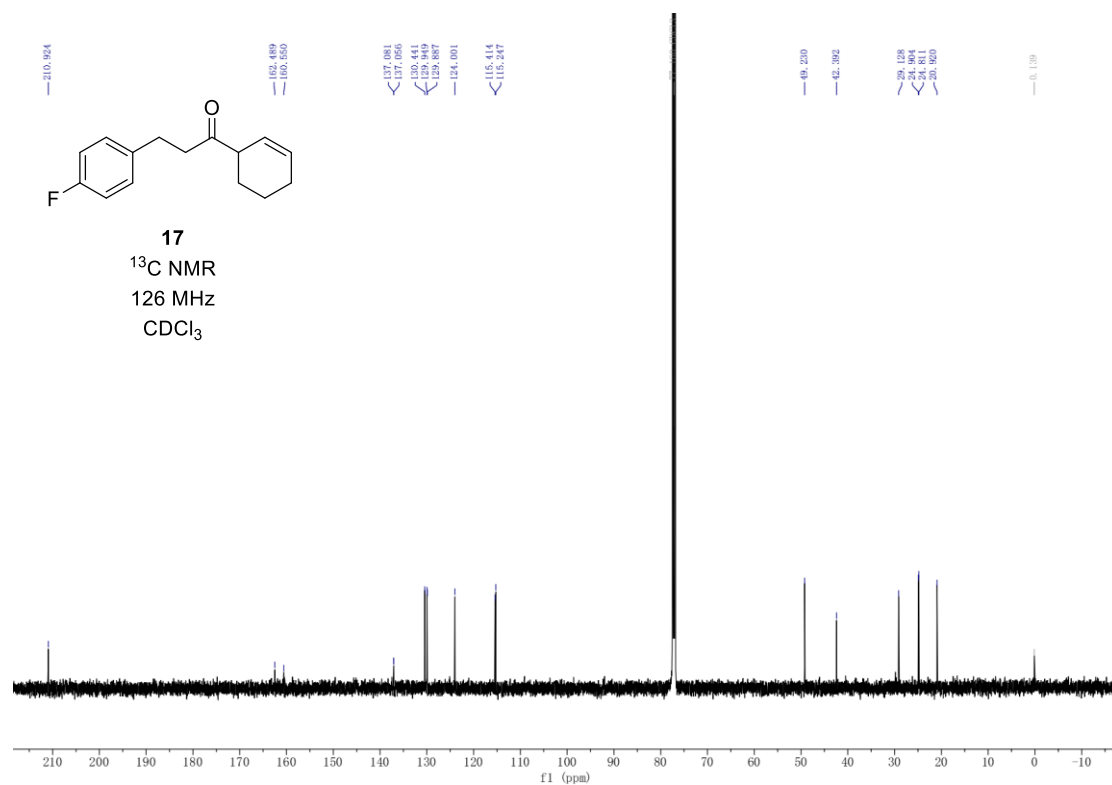



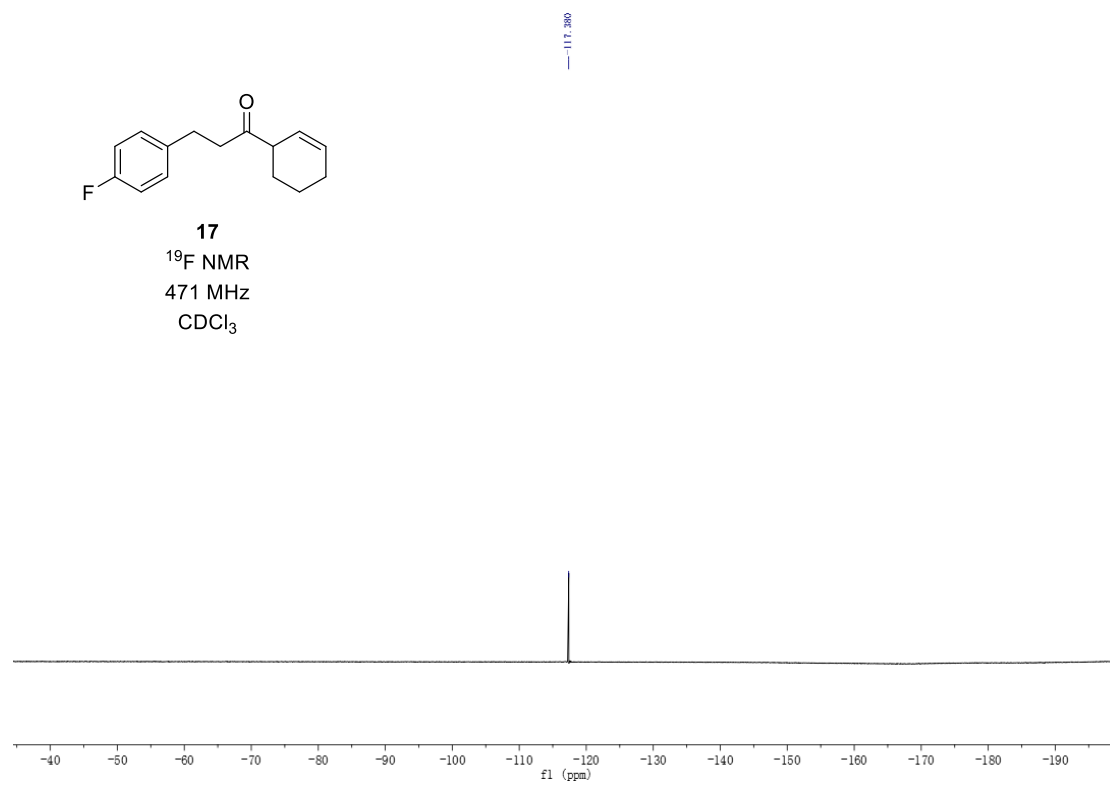

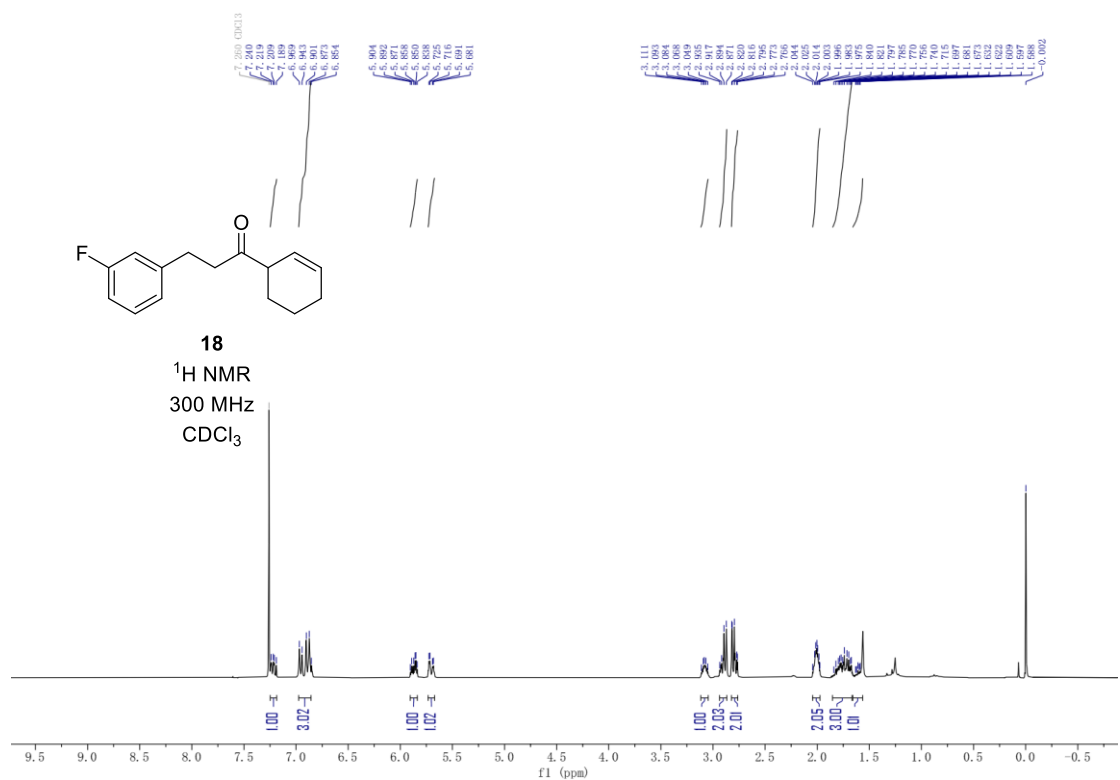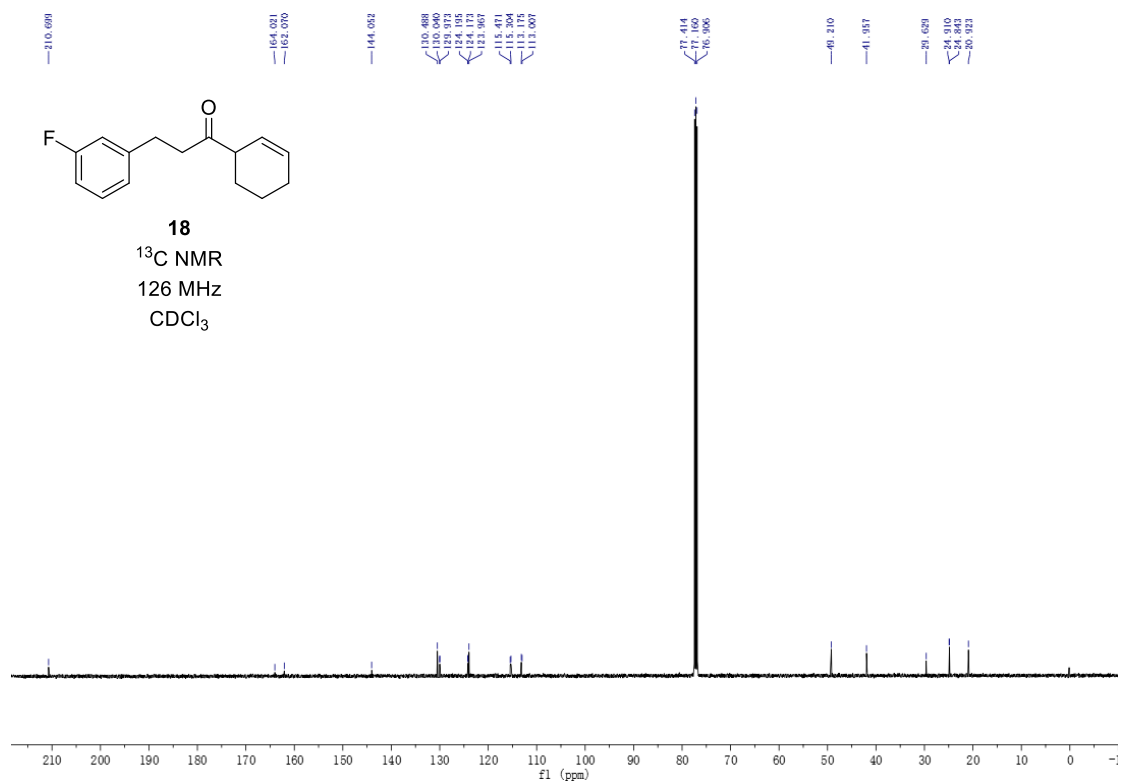

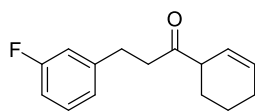

**18**

<sup>19</sup>F NMR

471 MHz

CDCl<sub>3</sub>

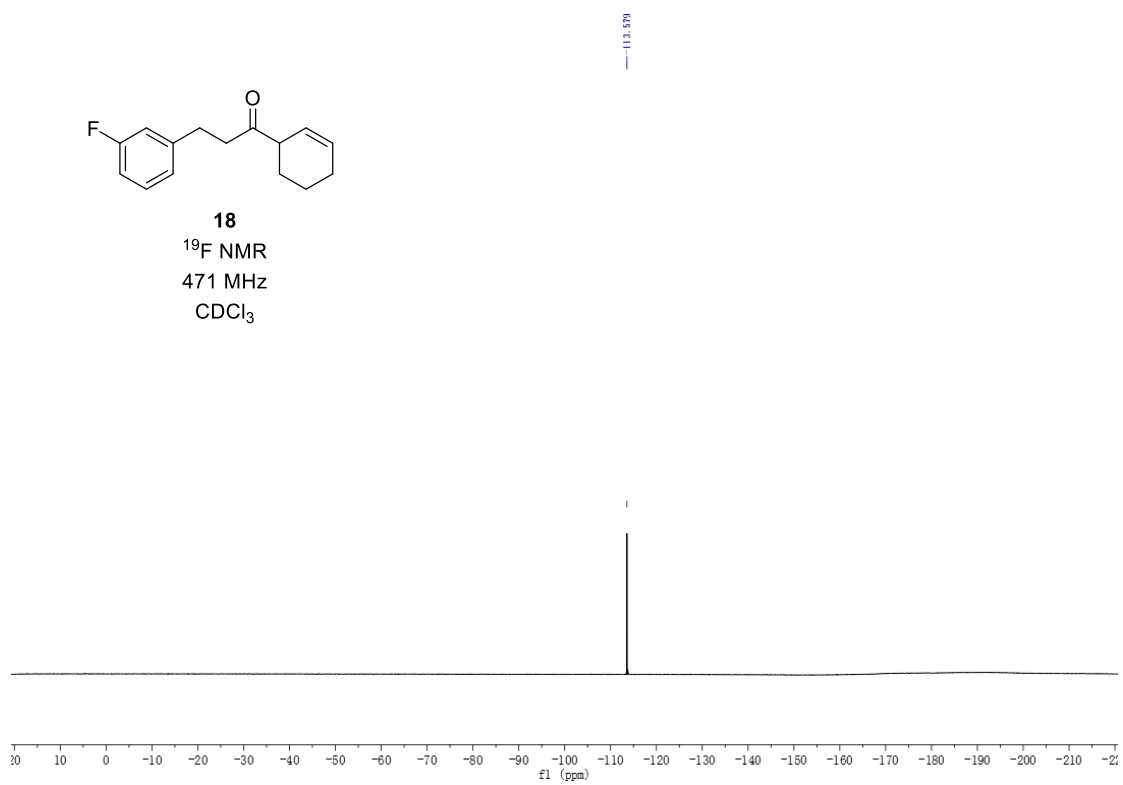

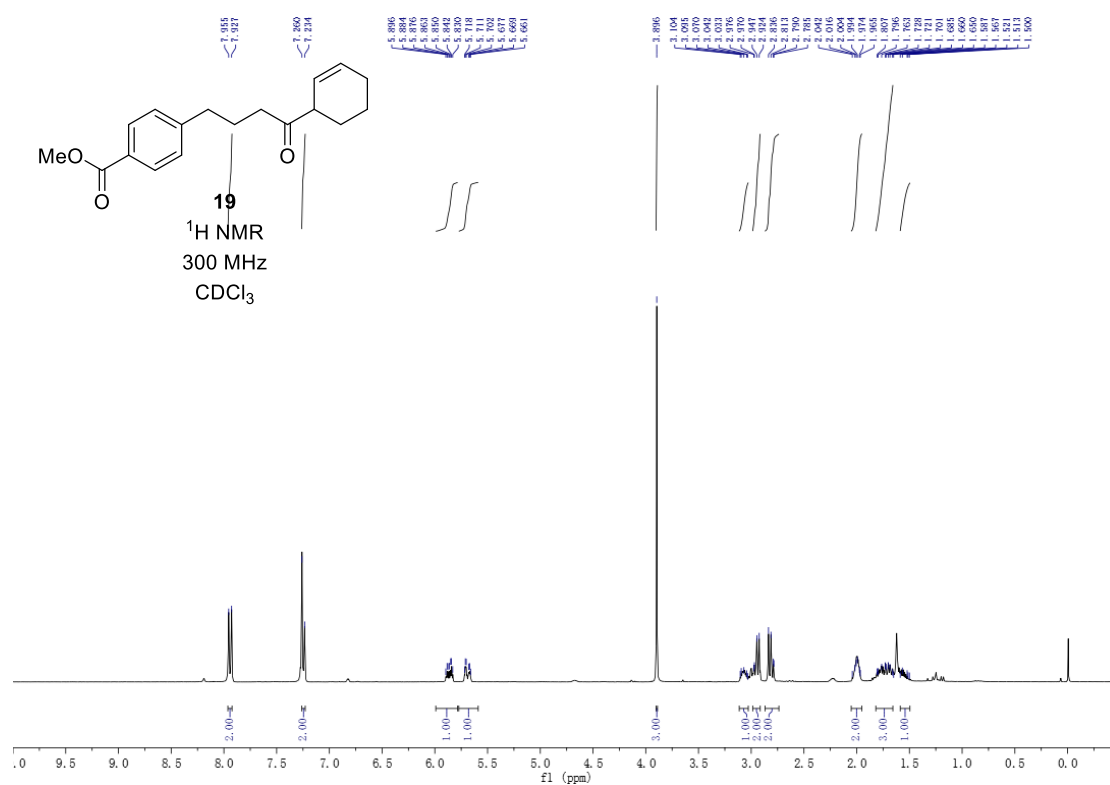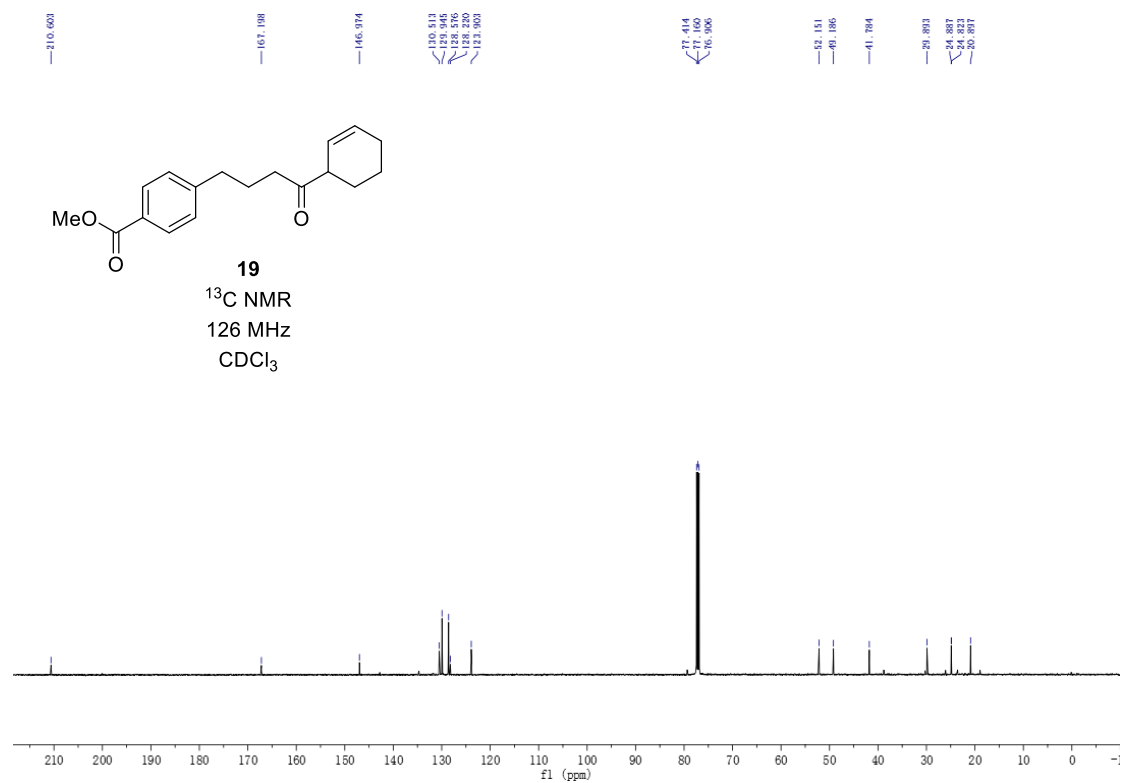

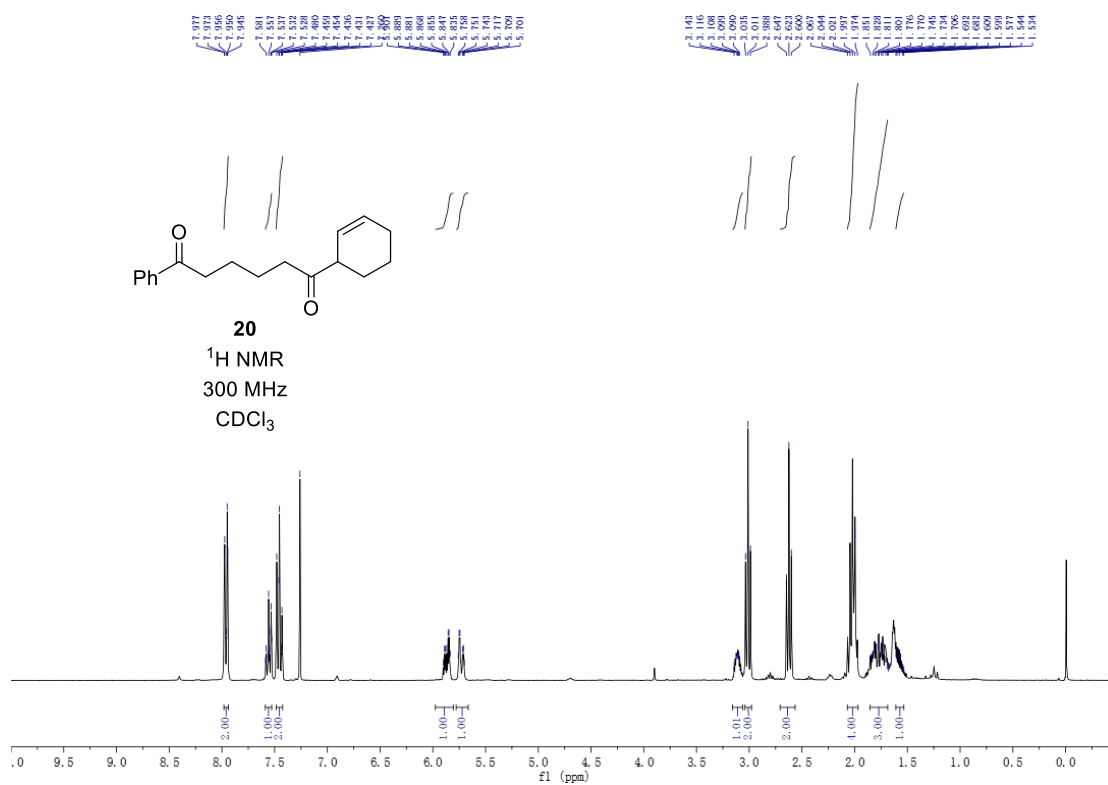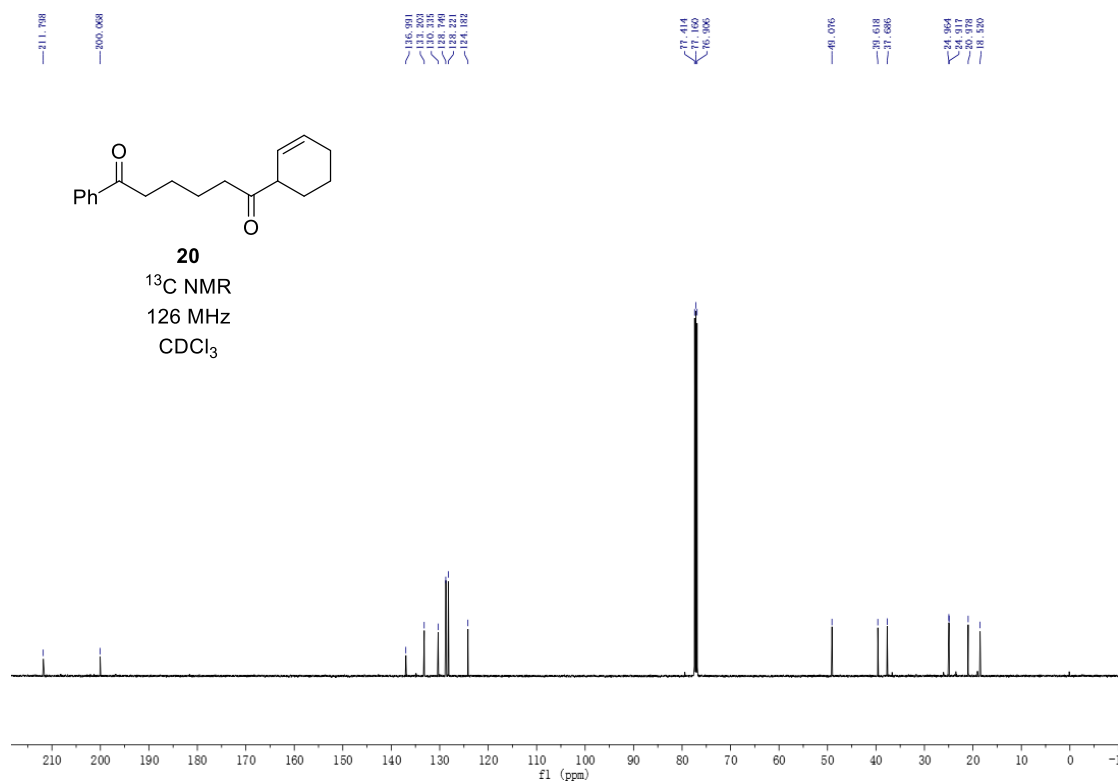

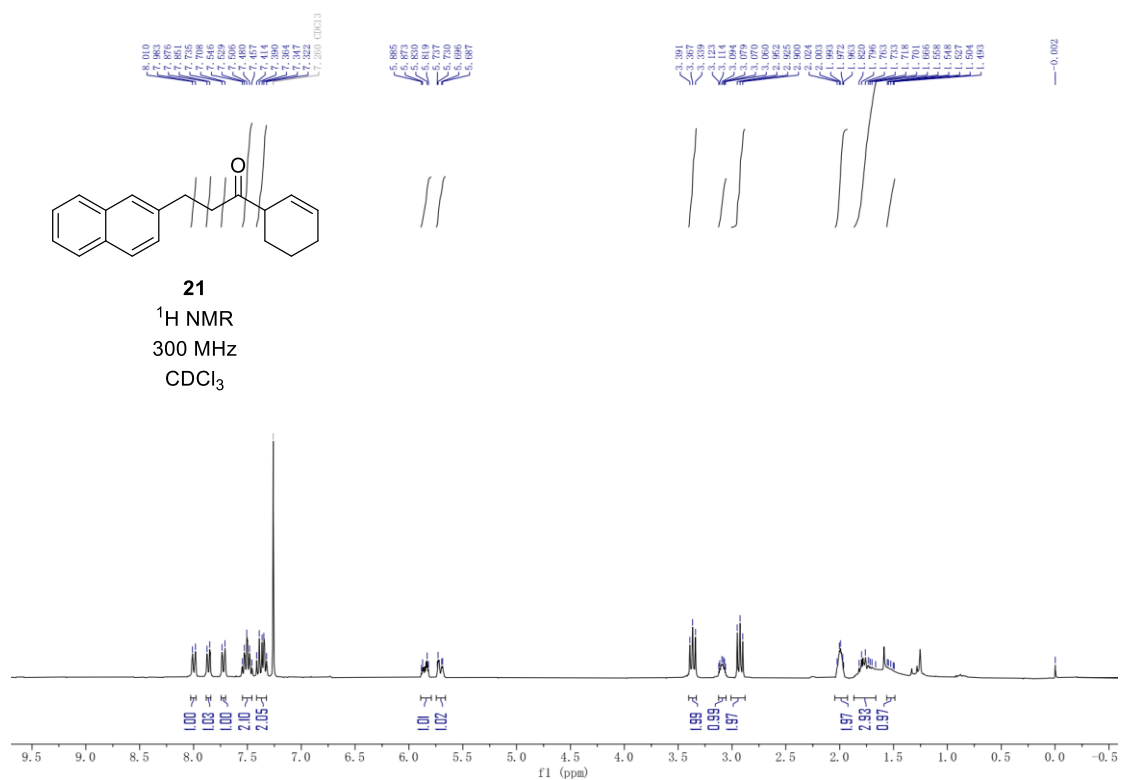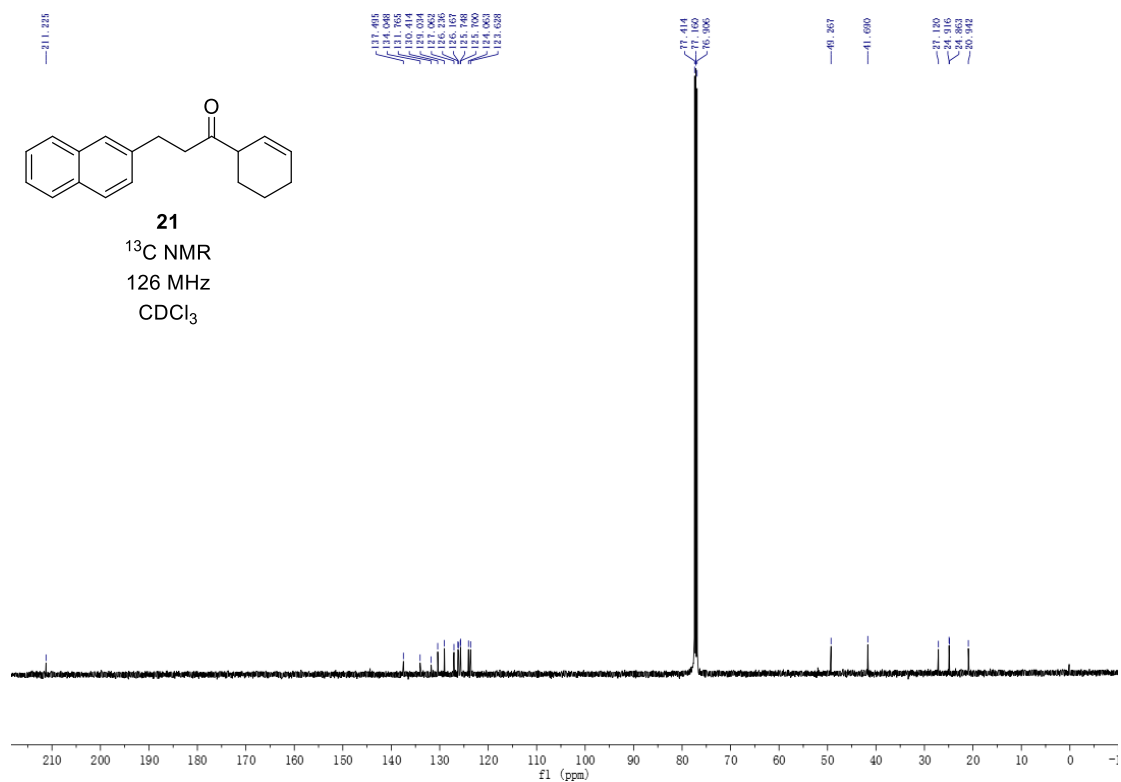

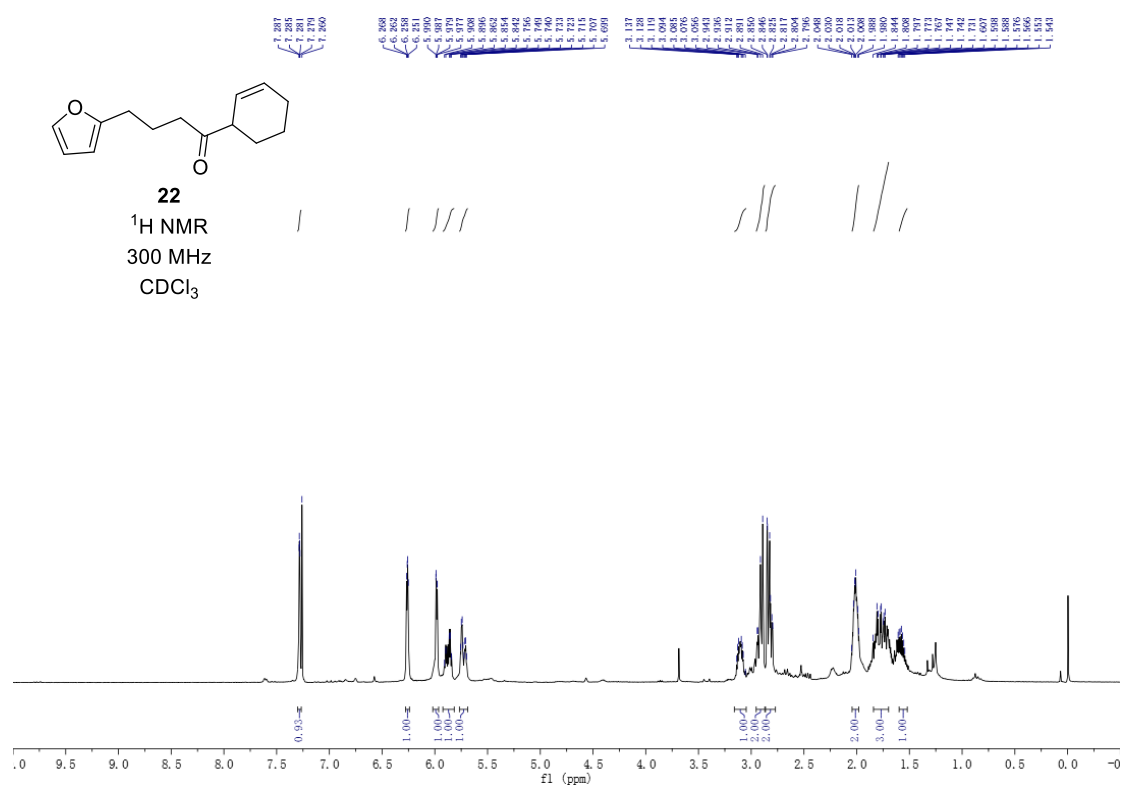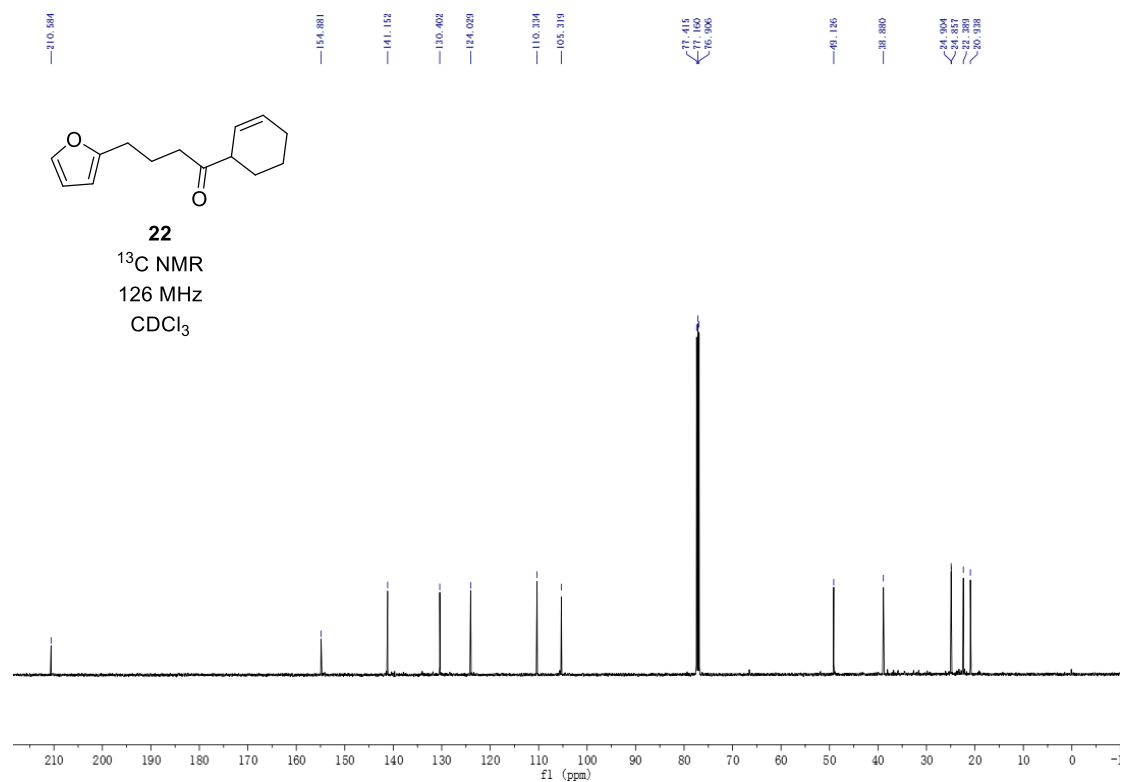

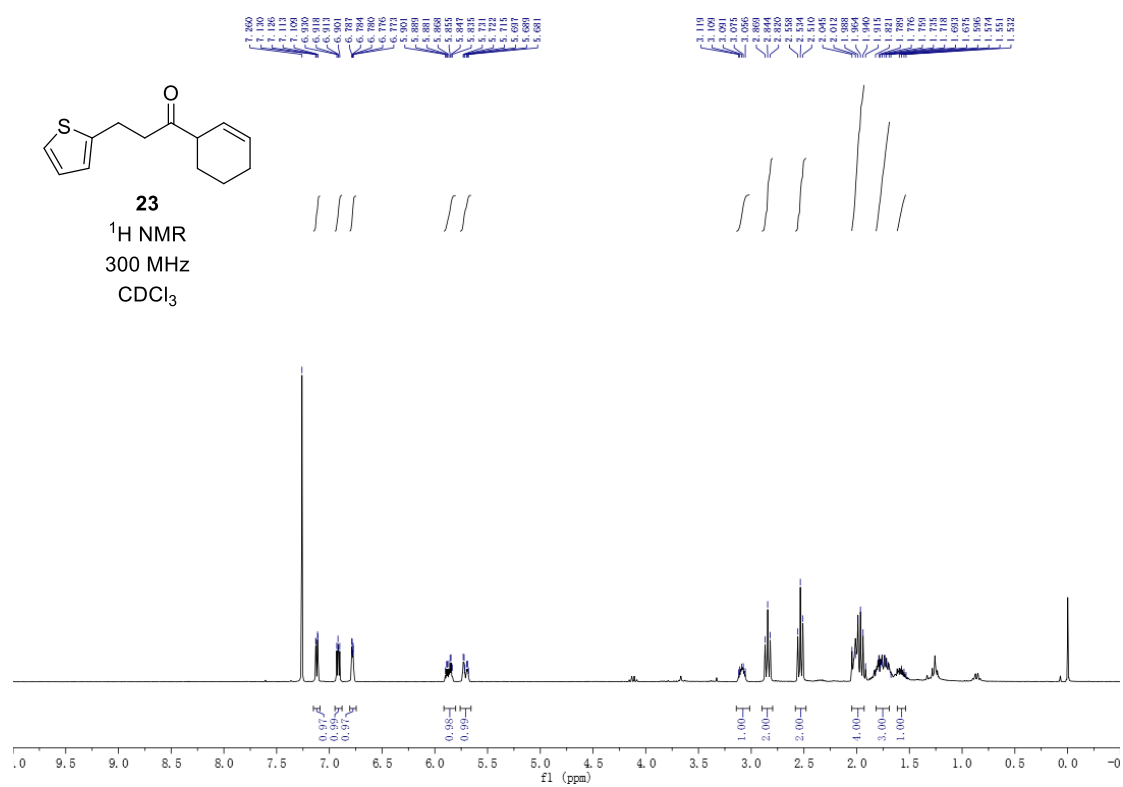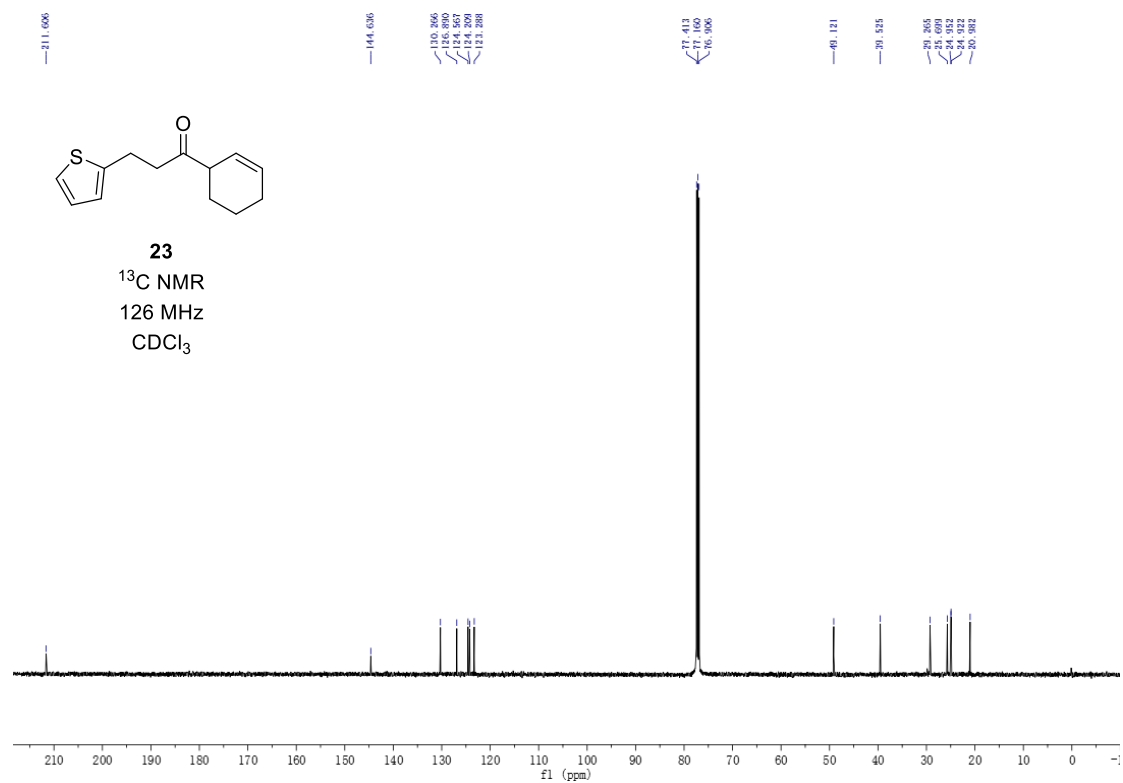



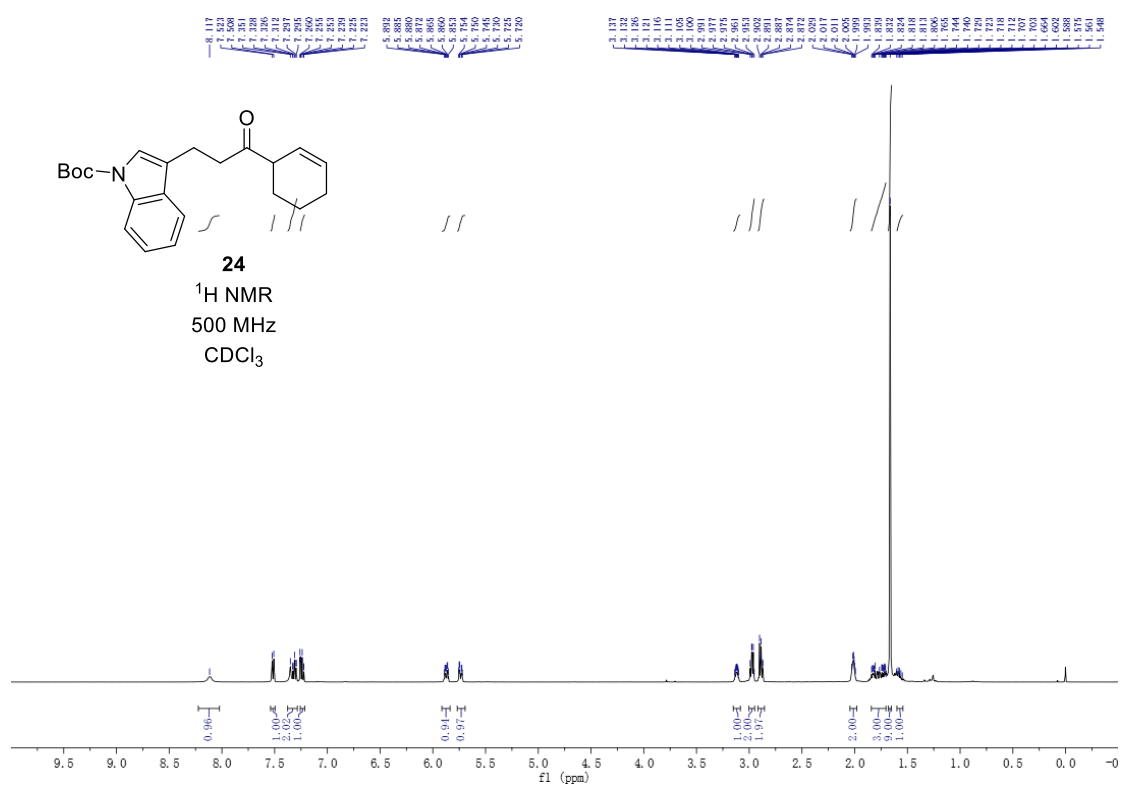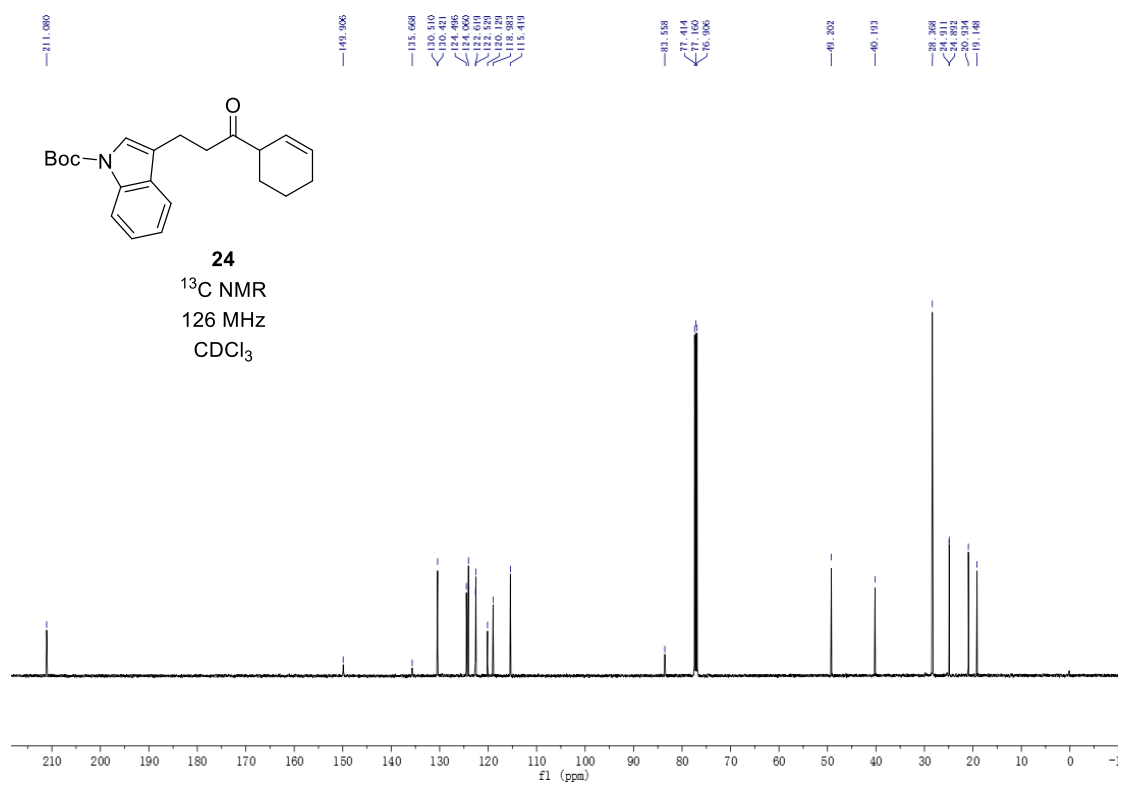

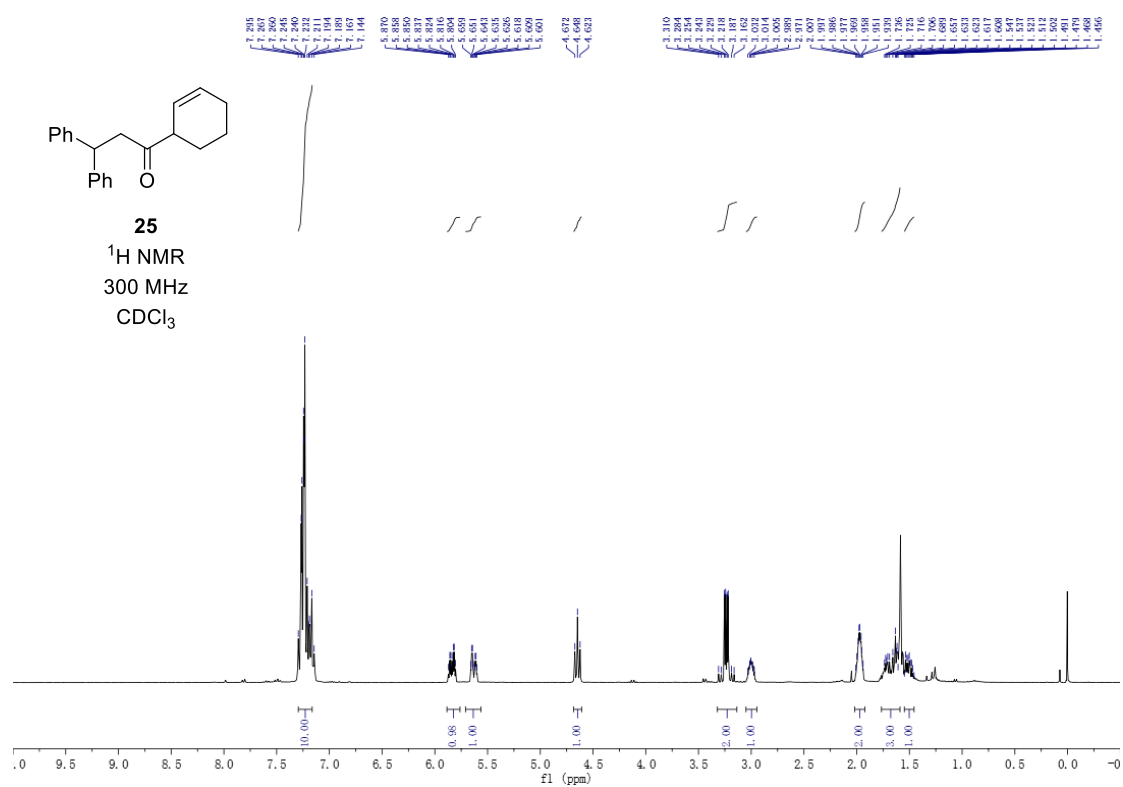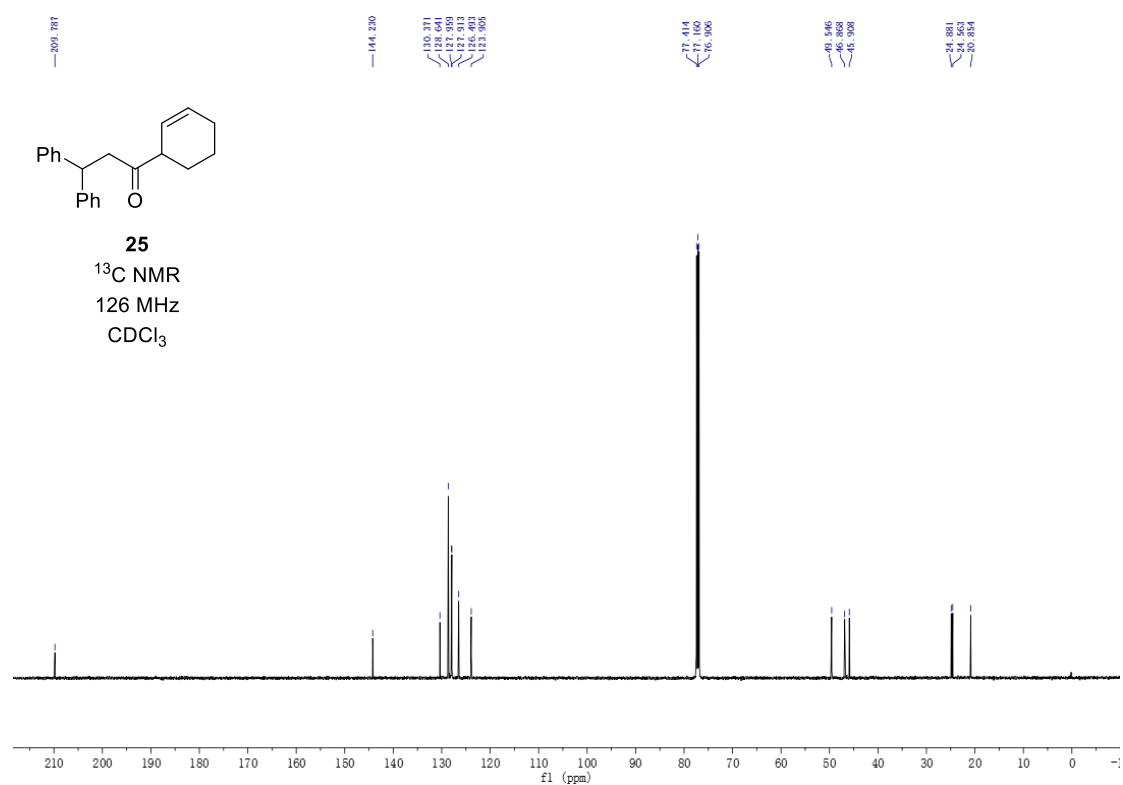



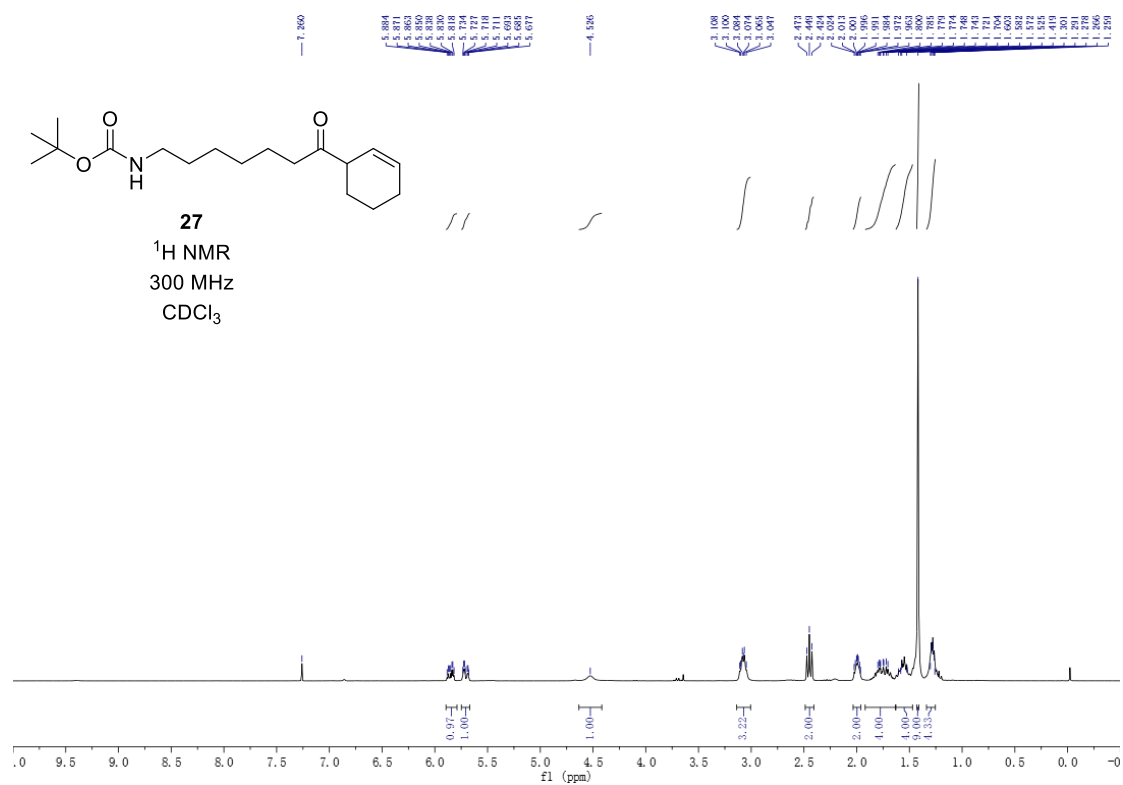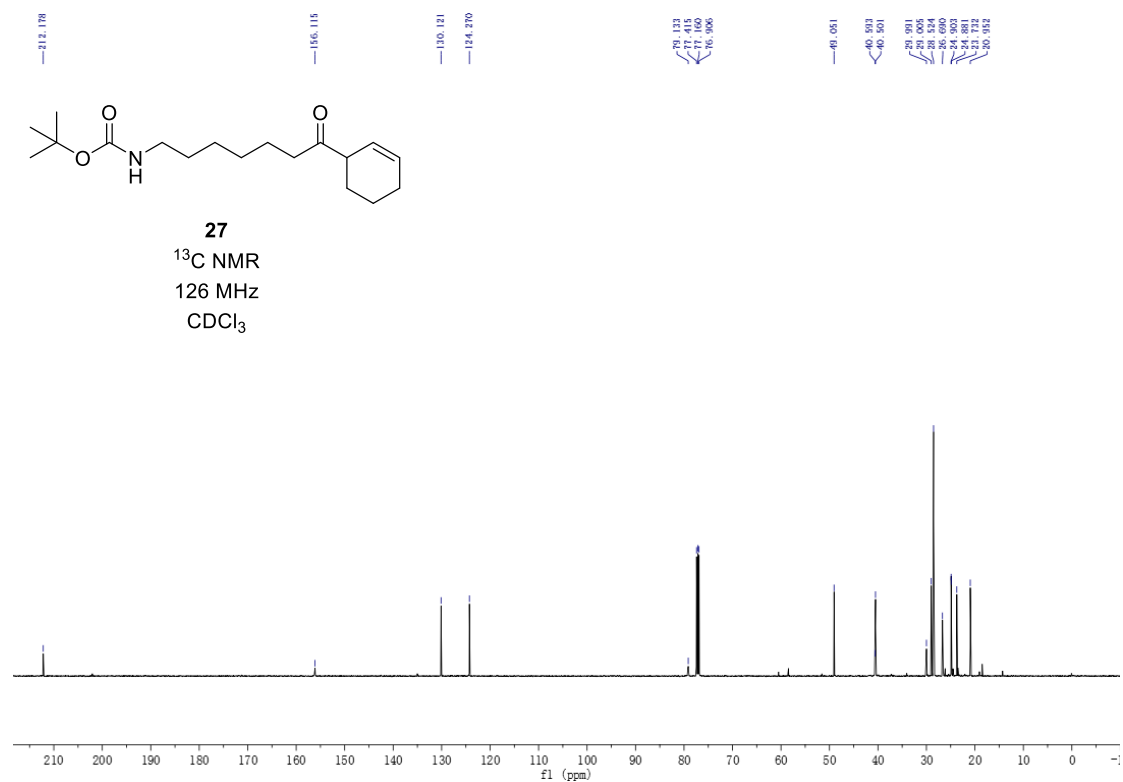

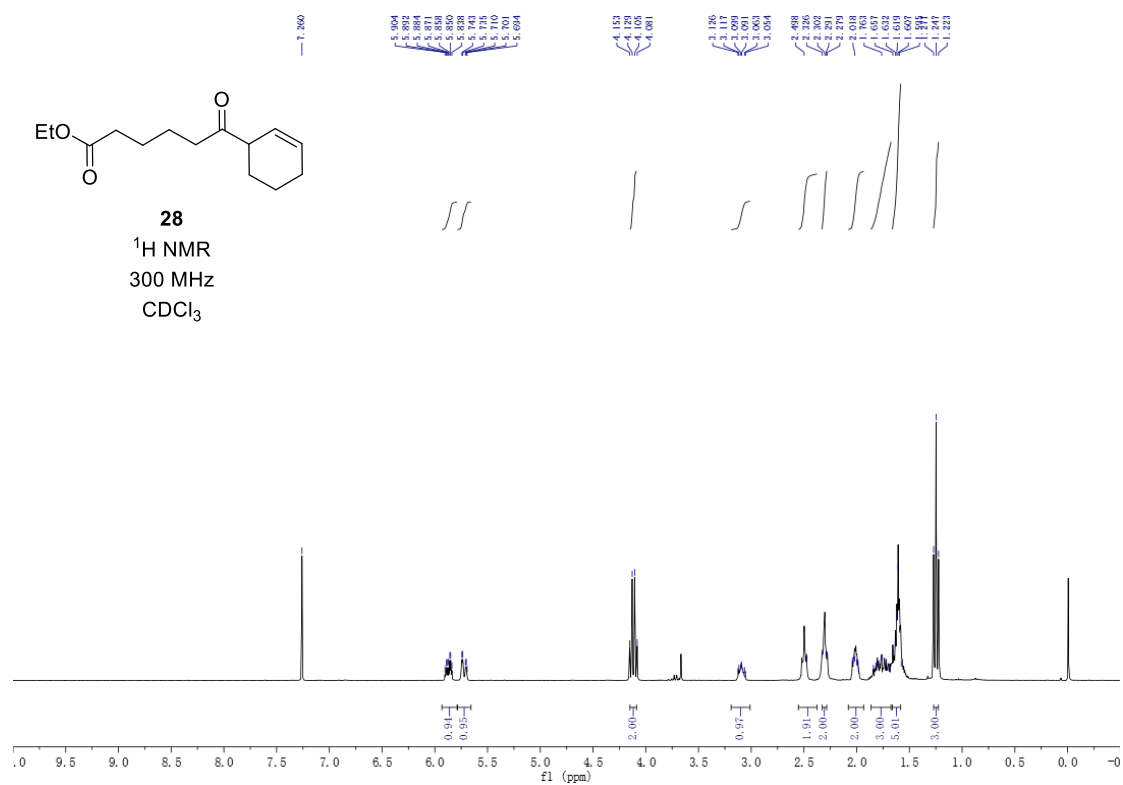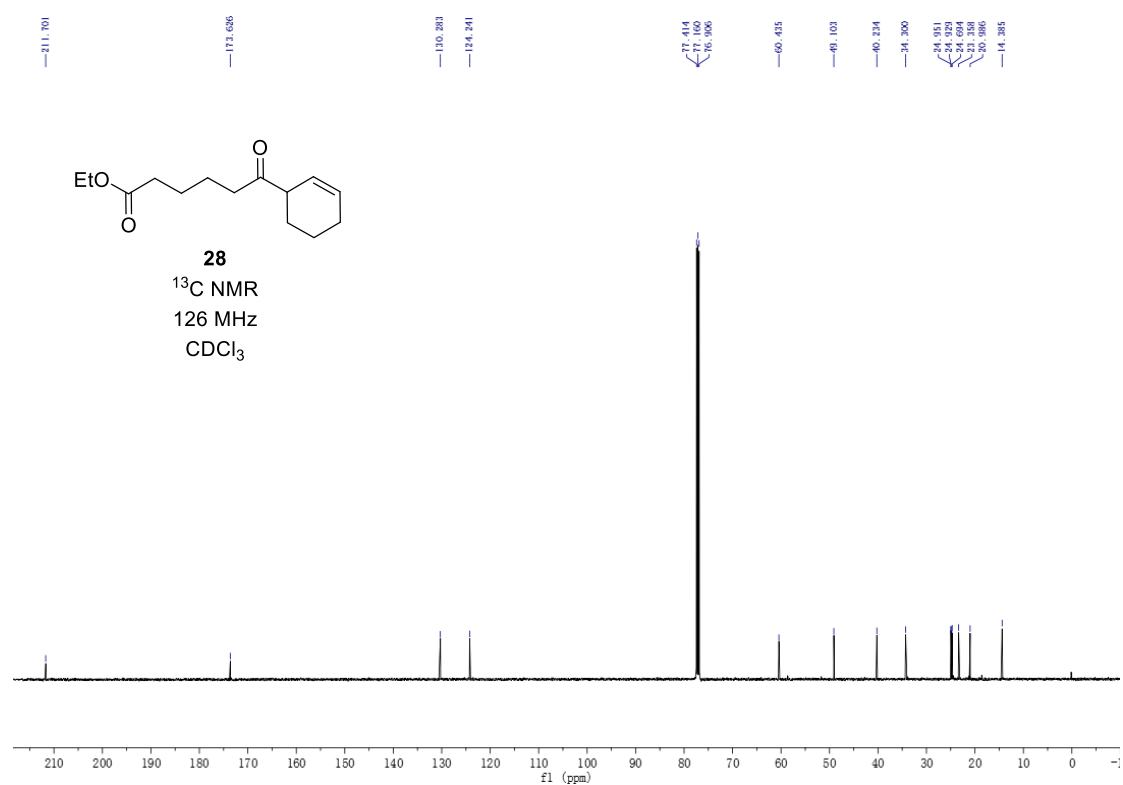

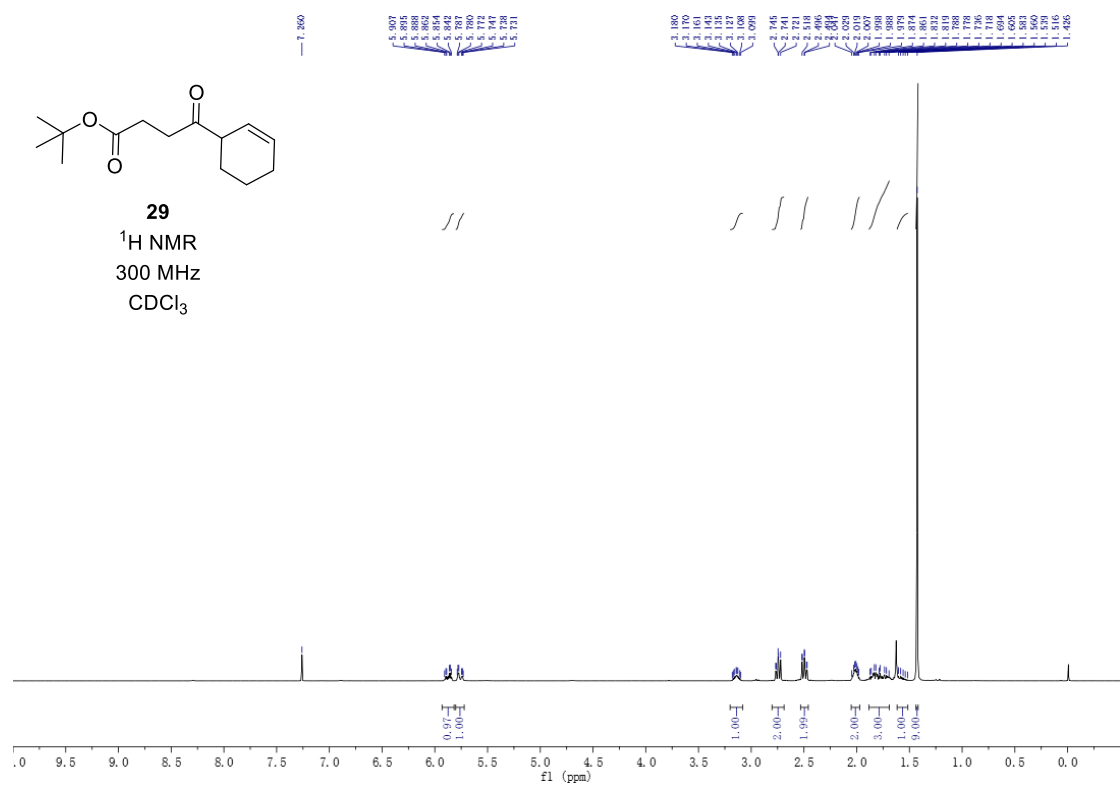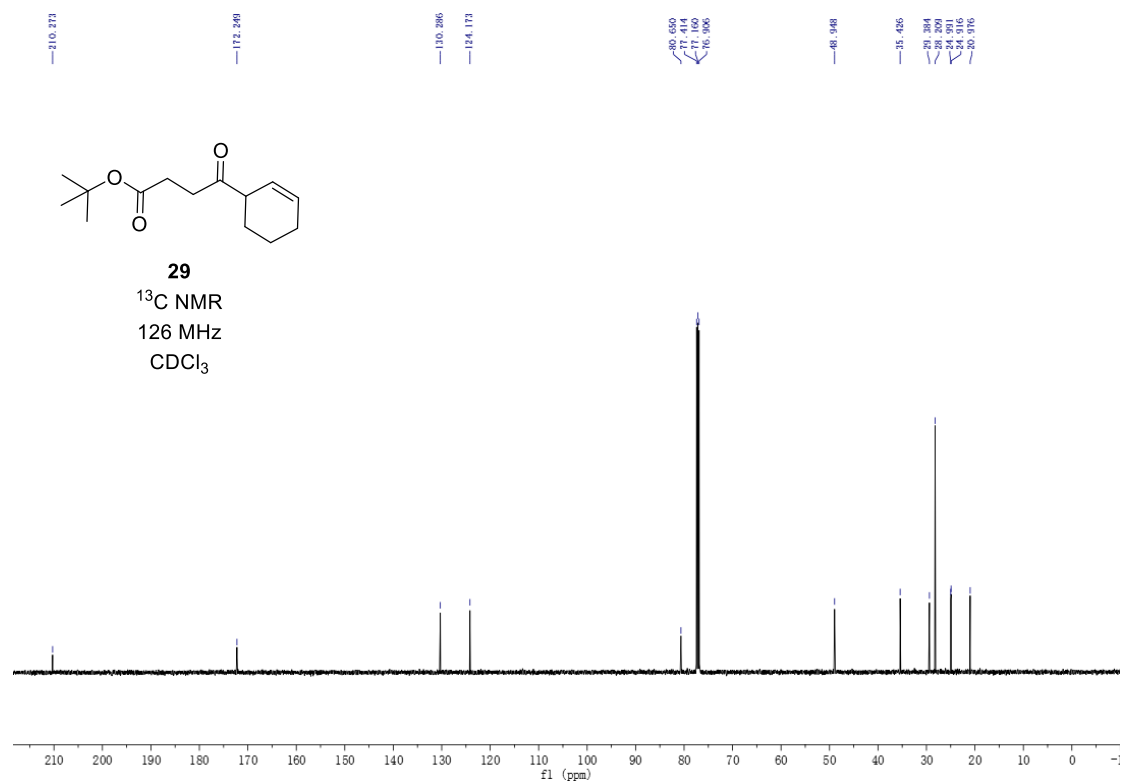

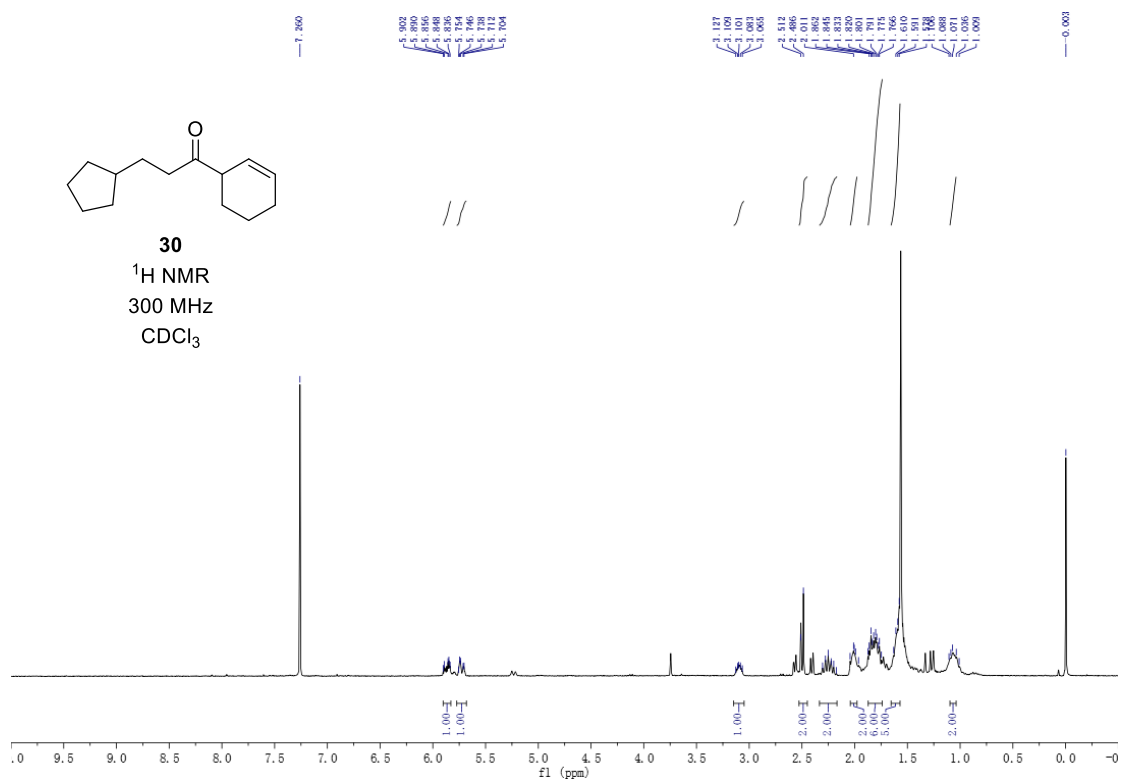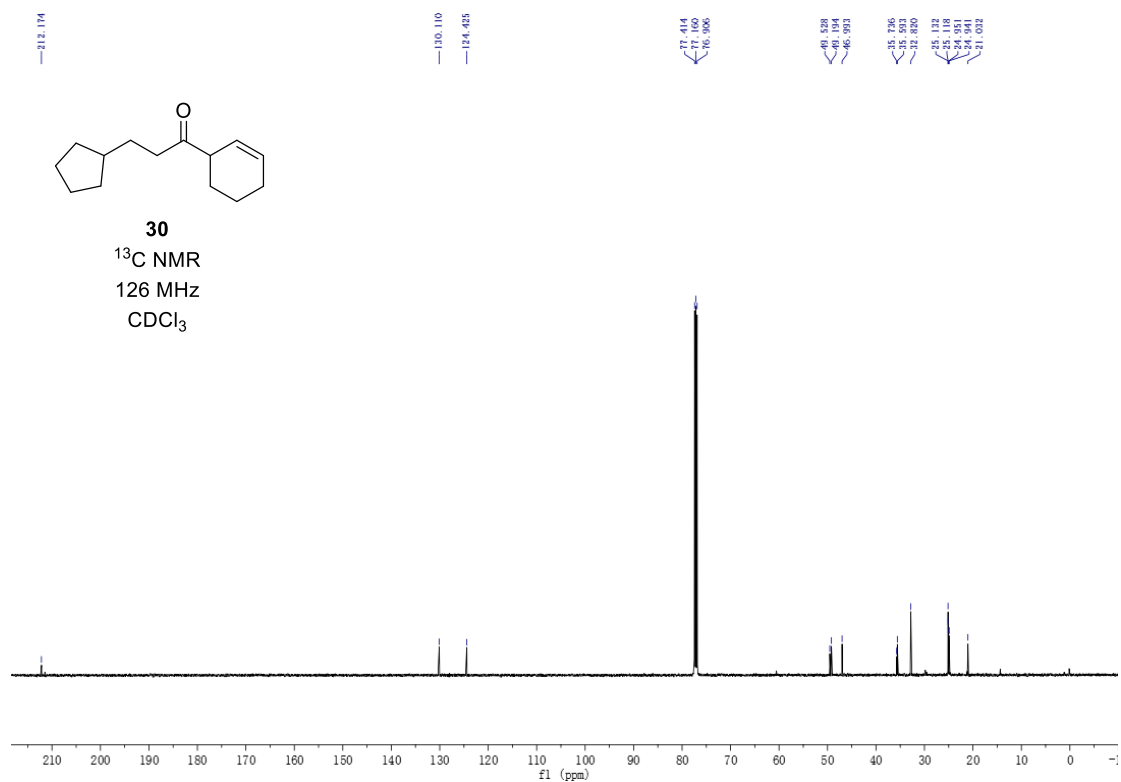

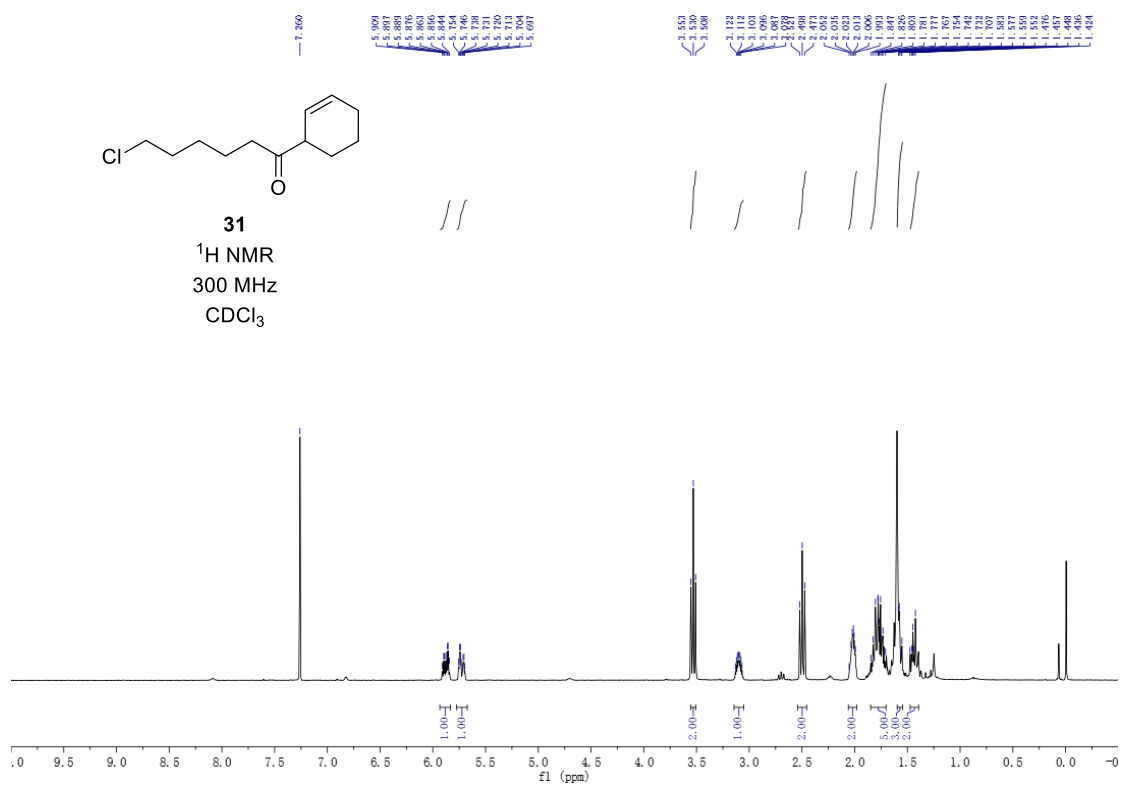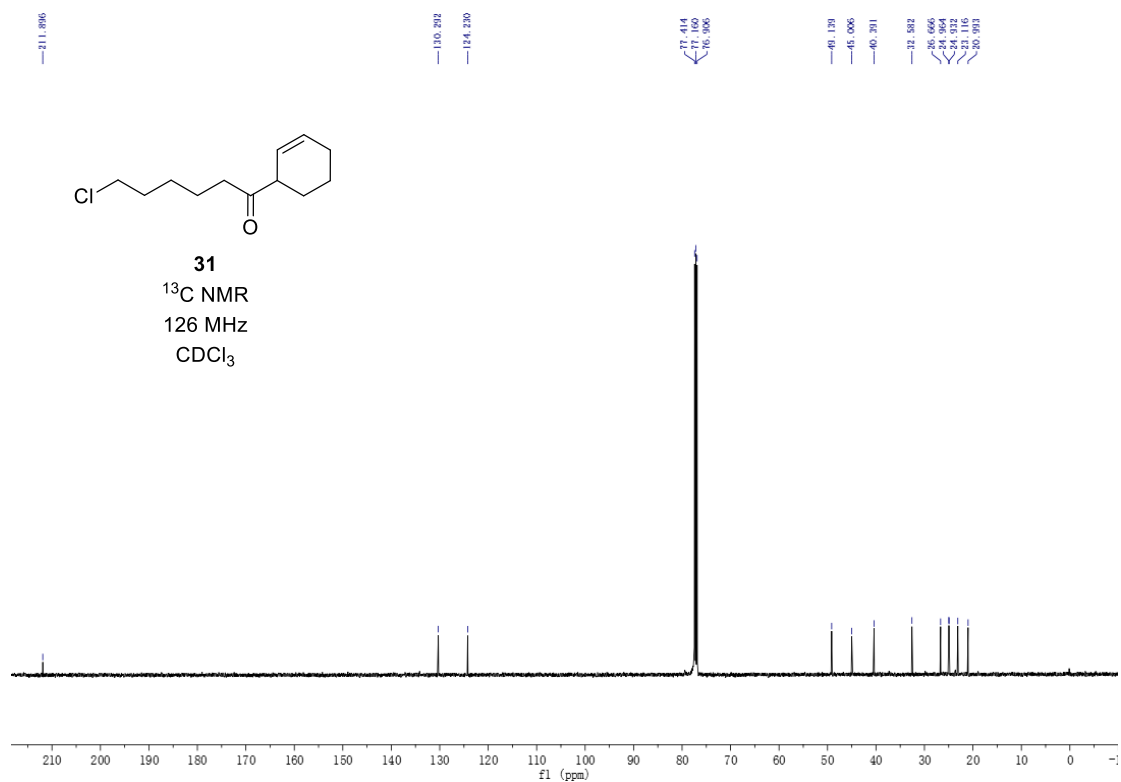



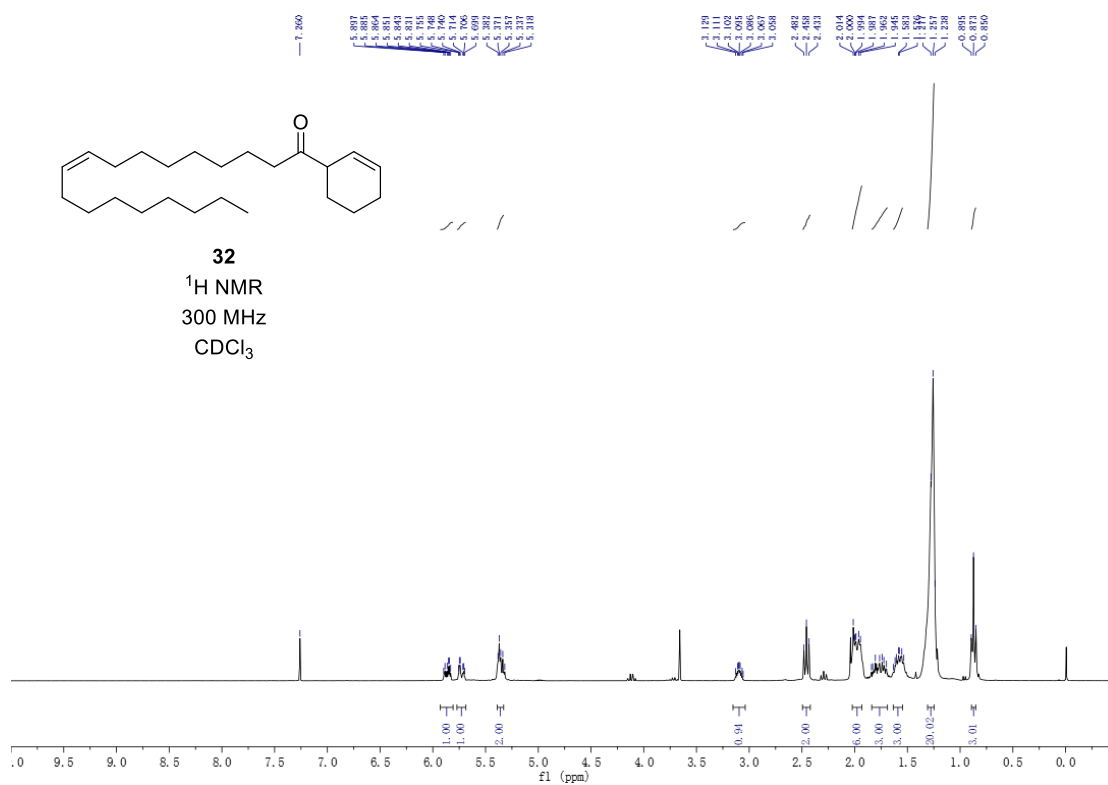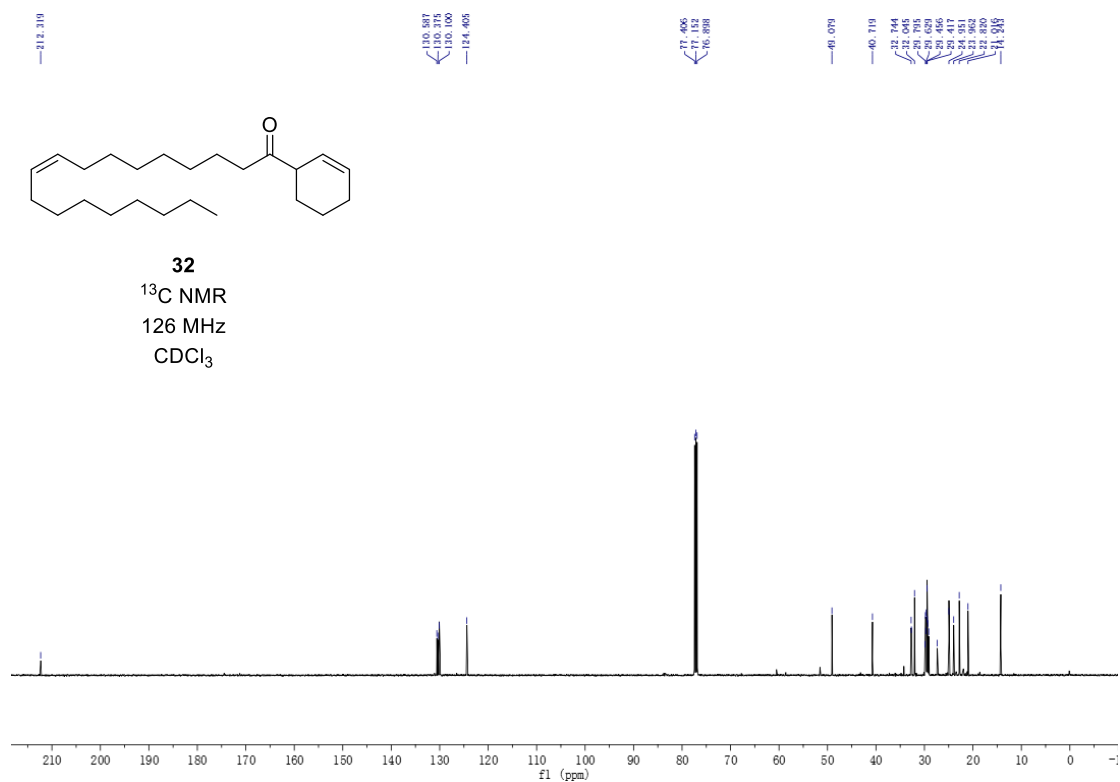

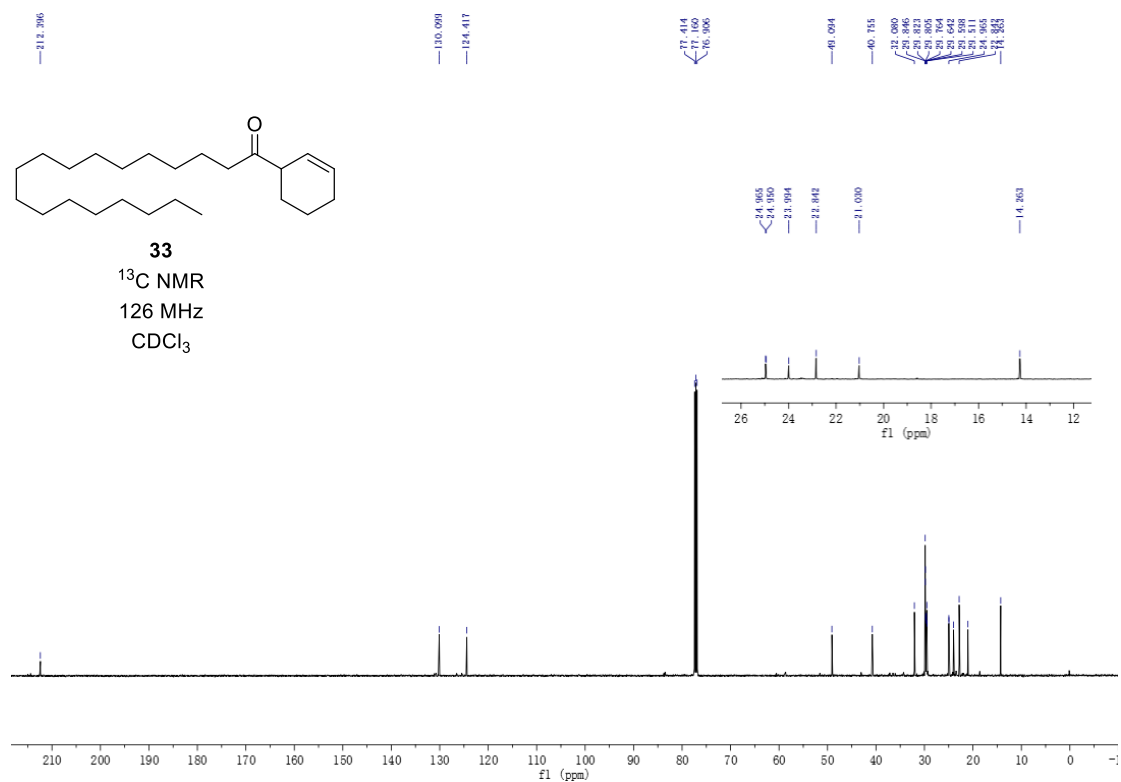

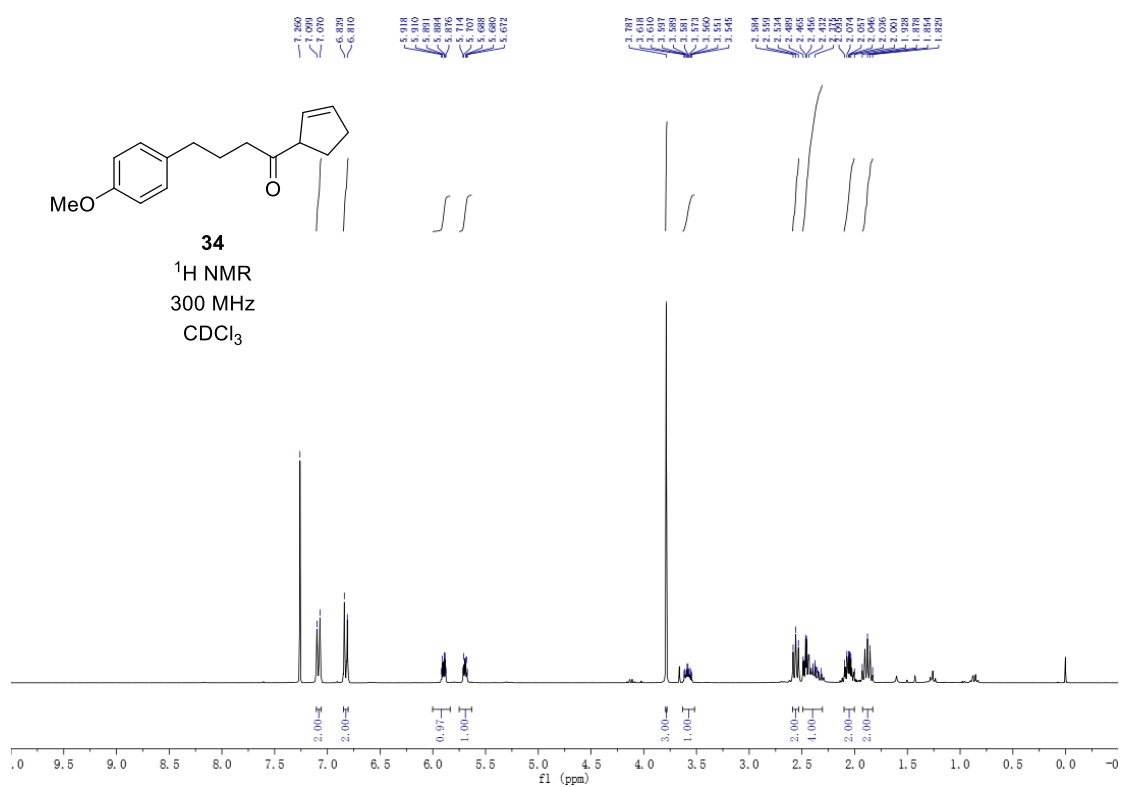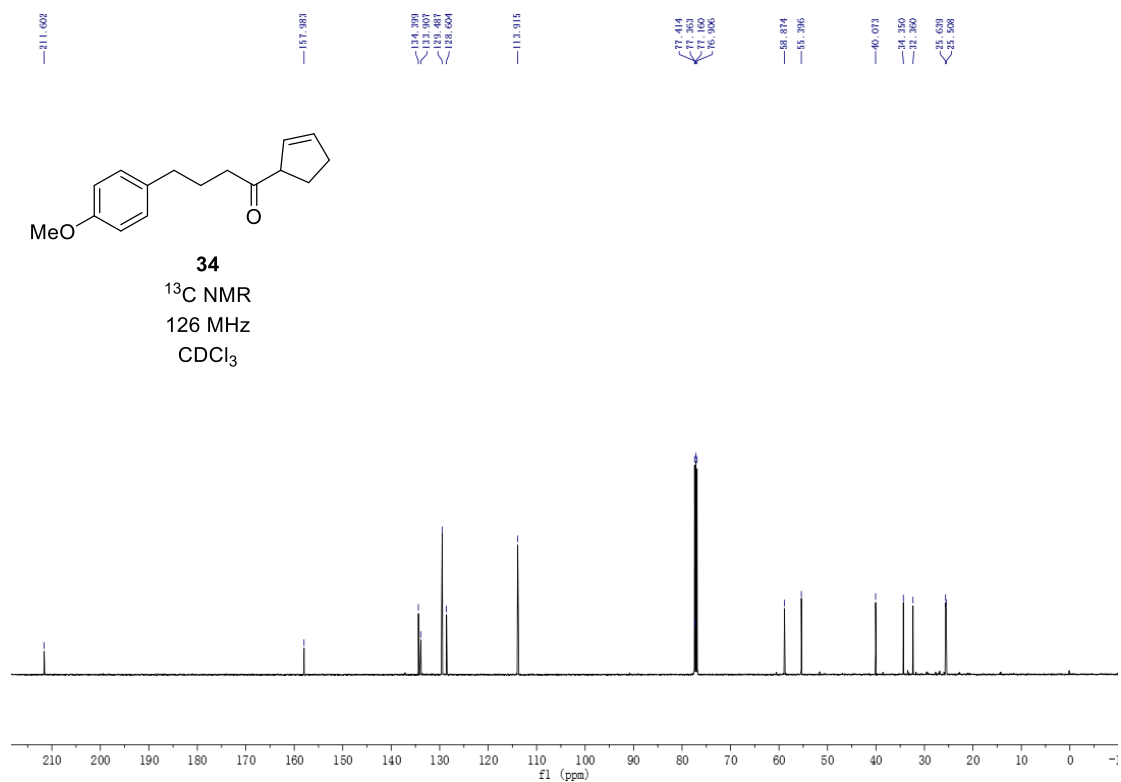

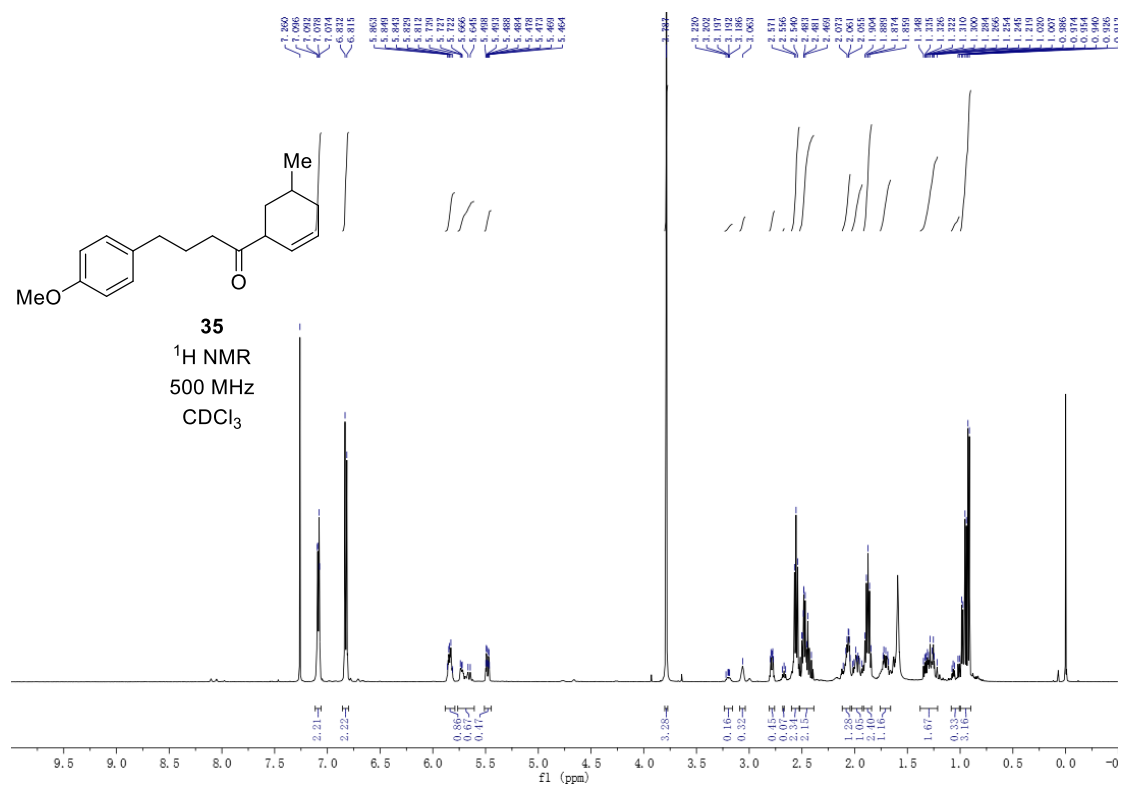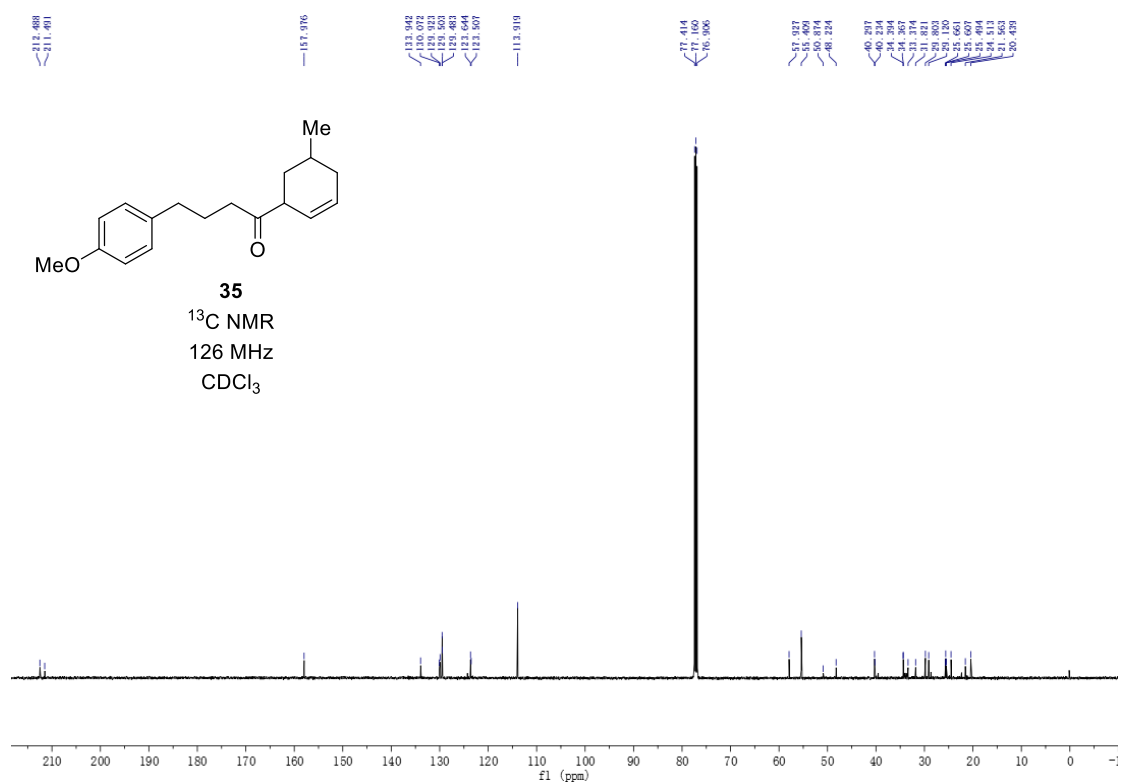

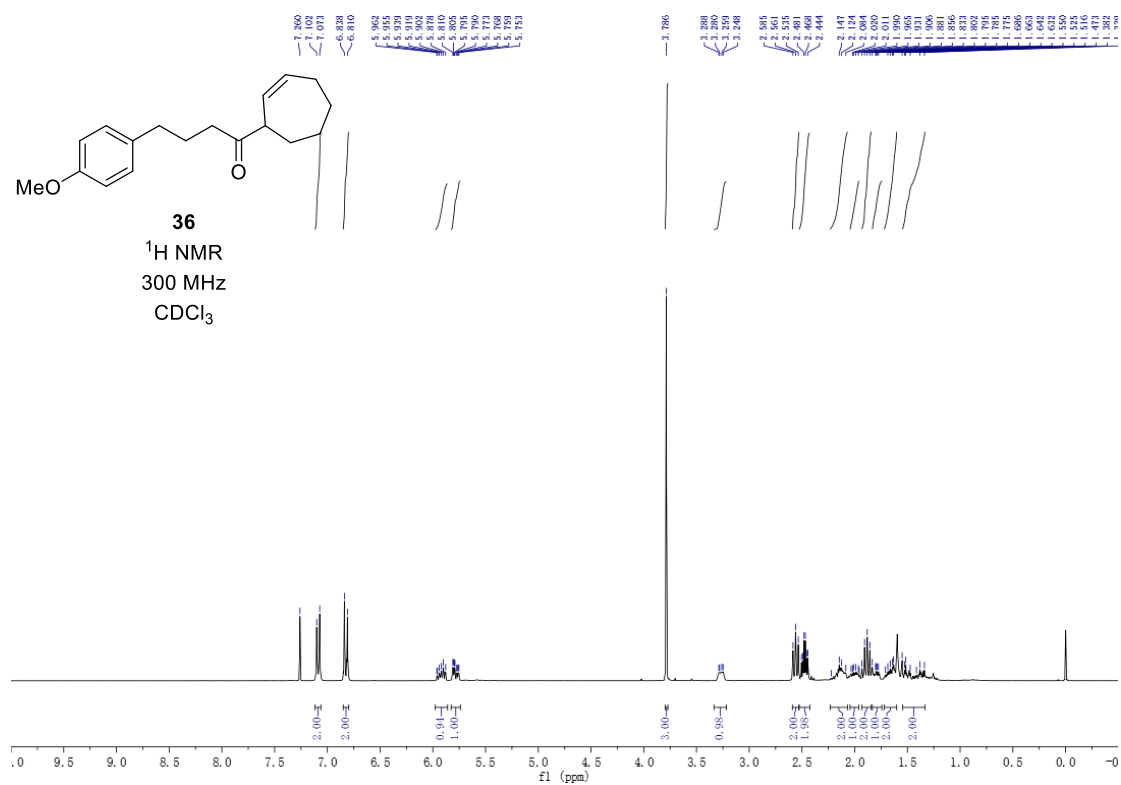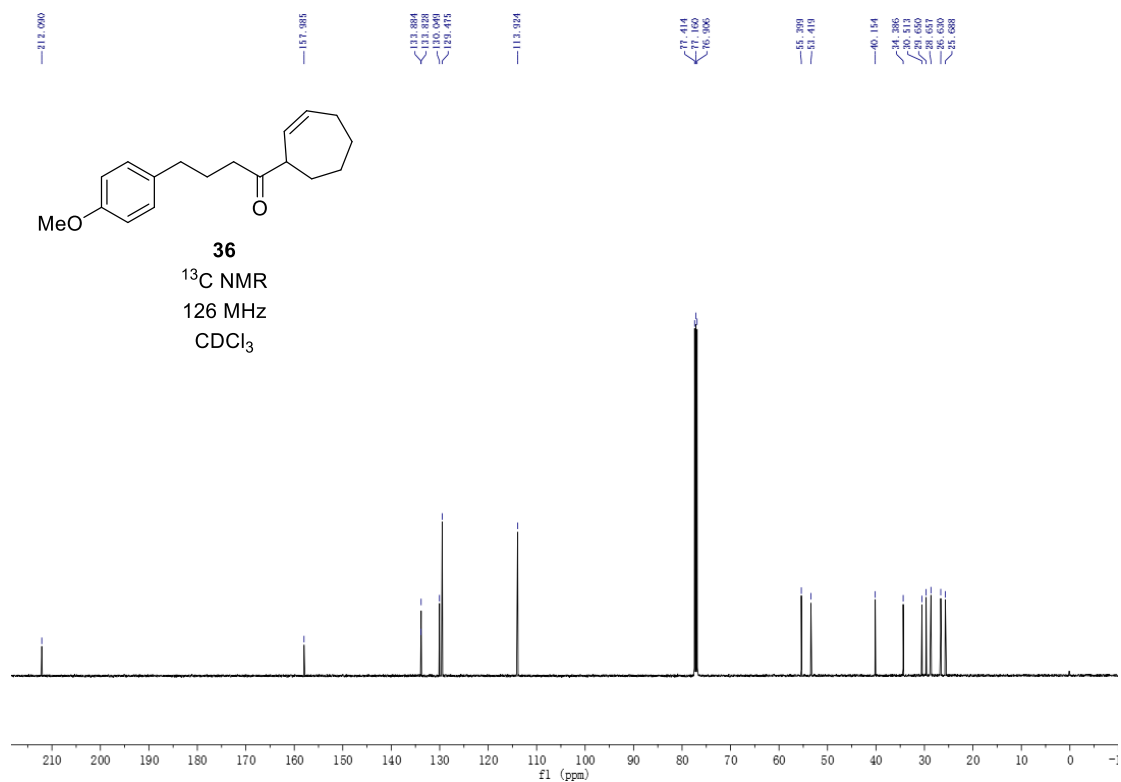



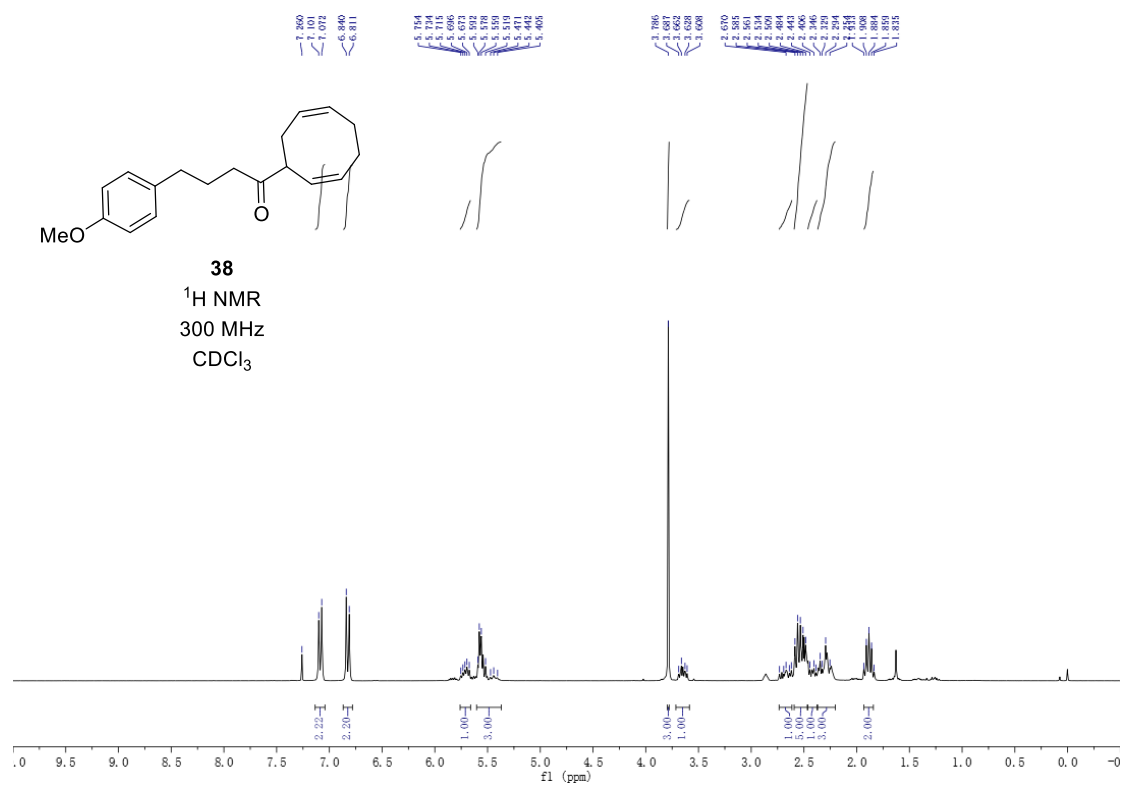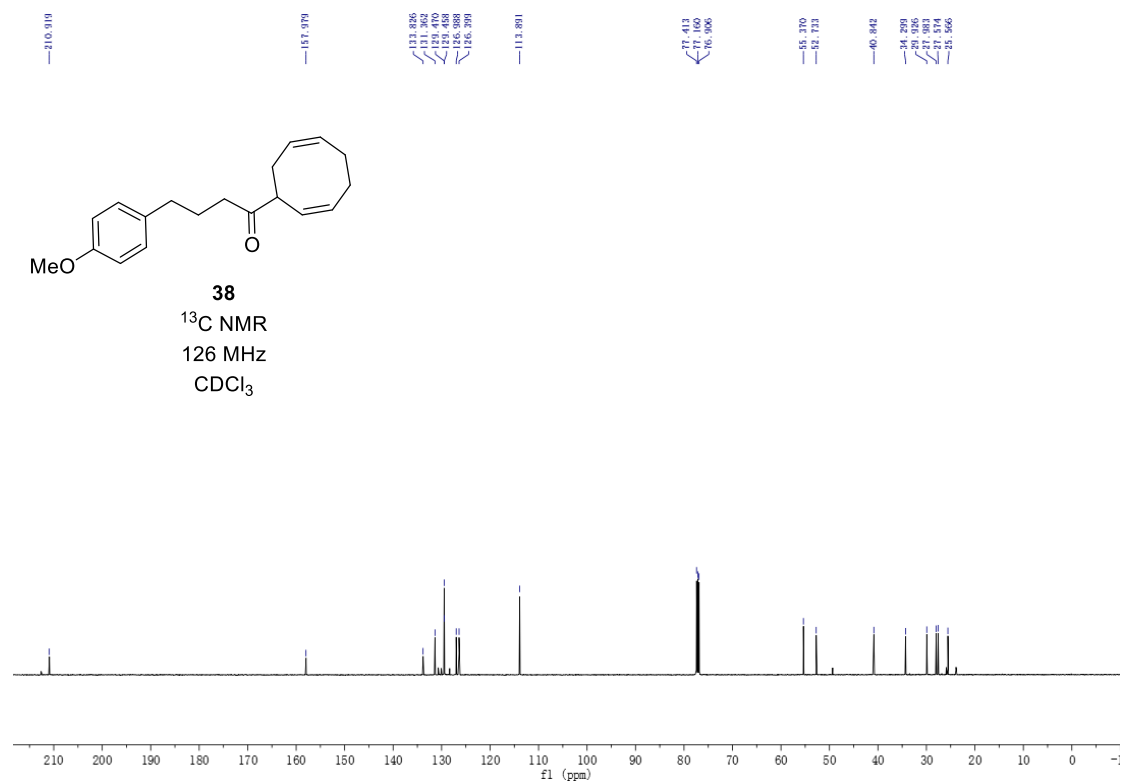

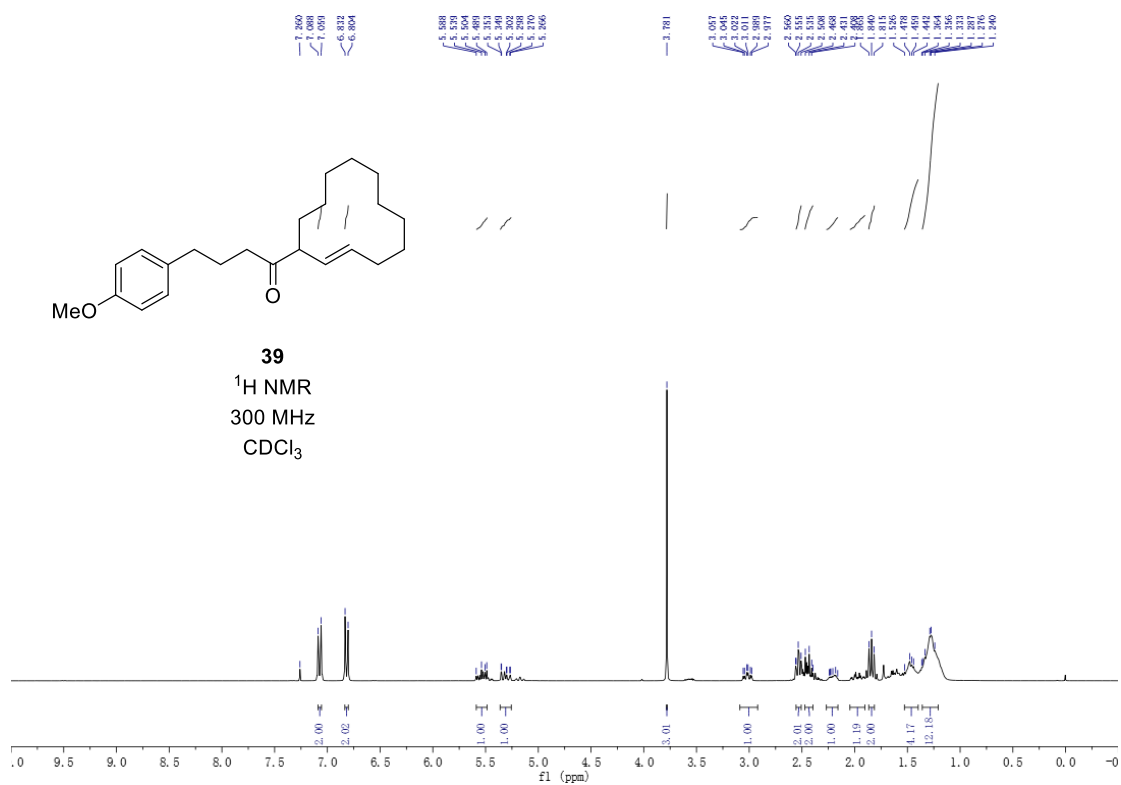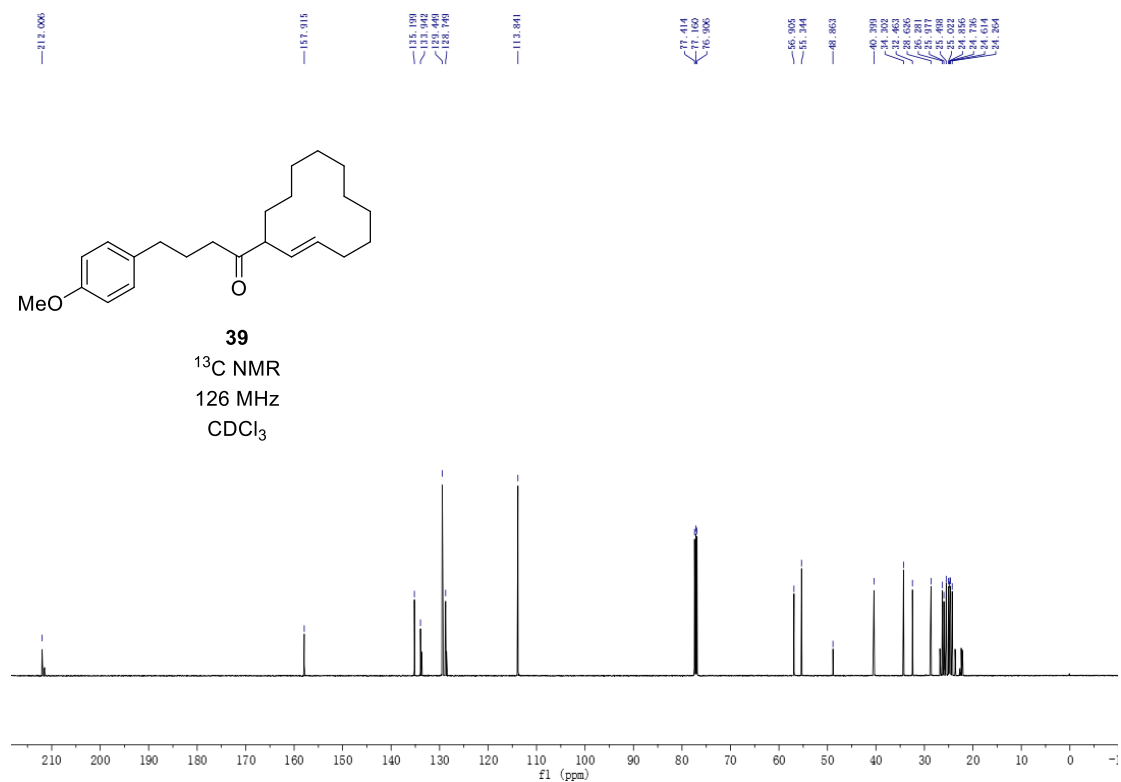



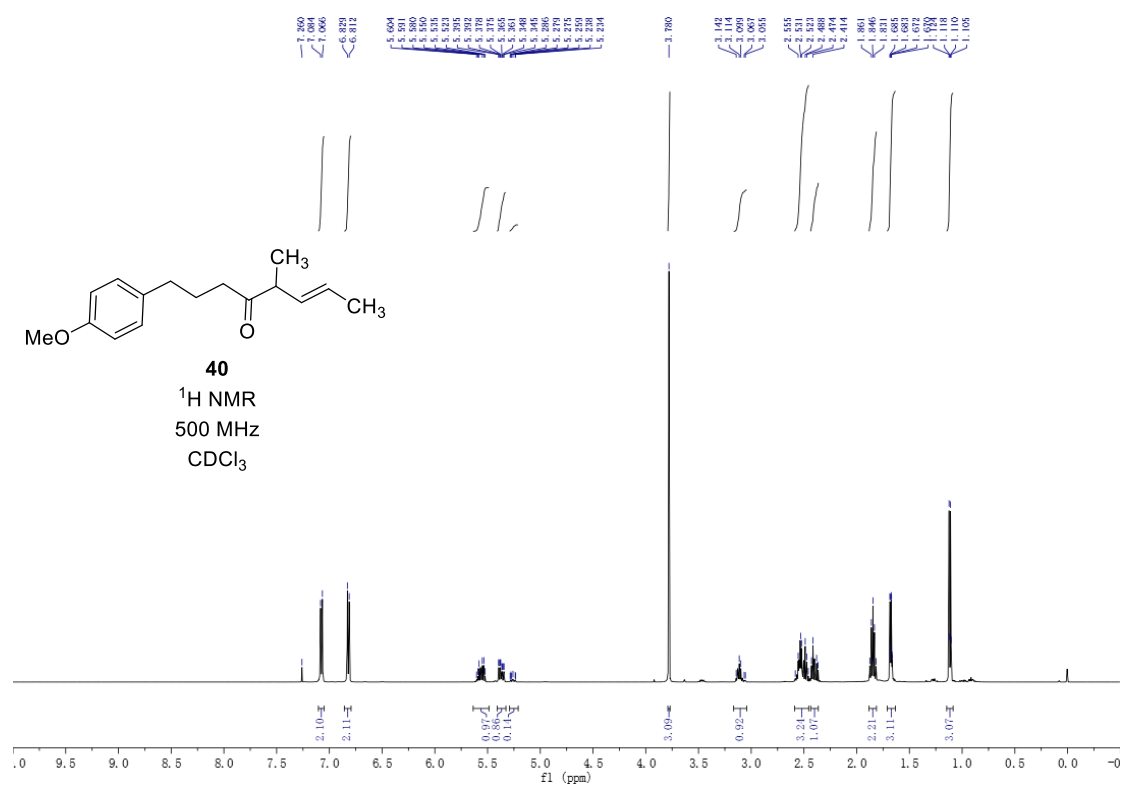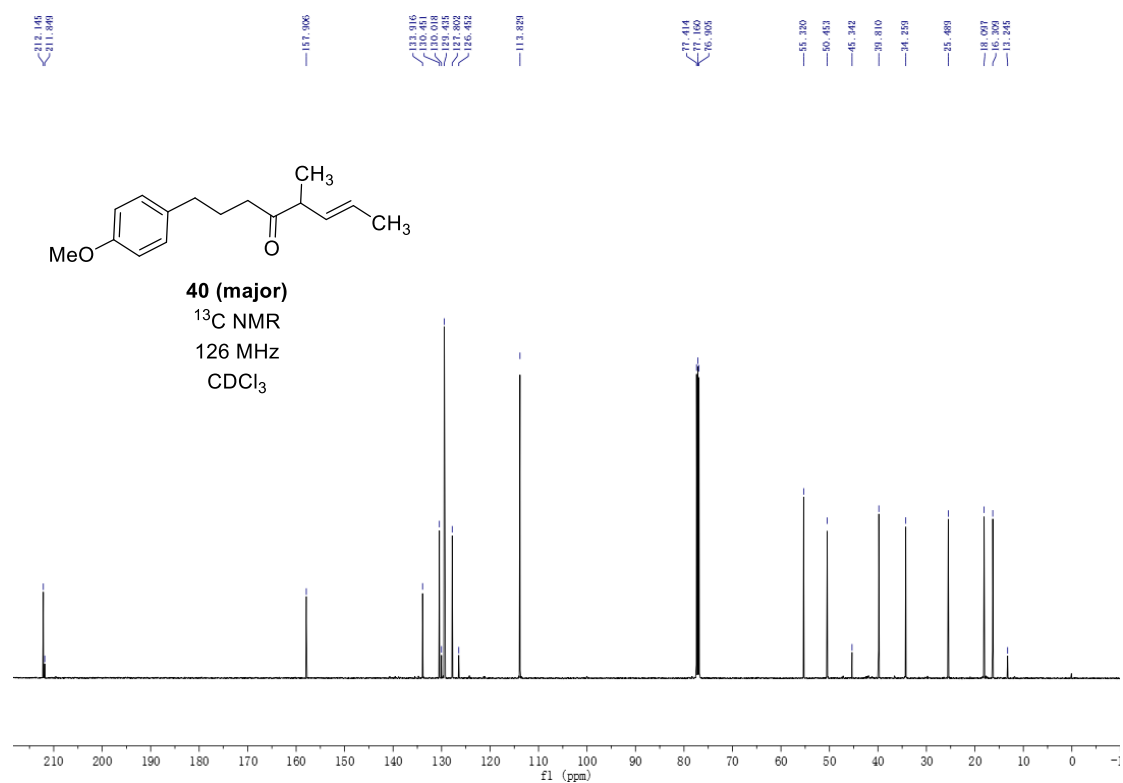

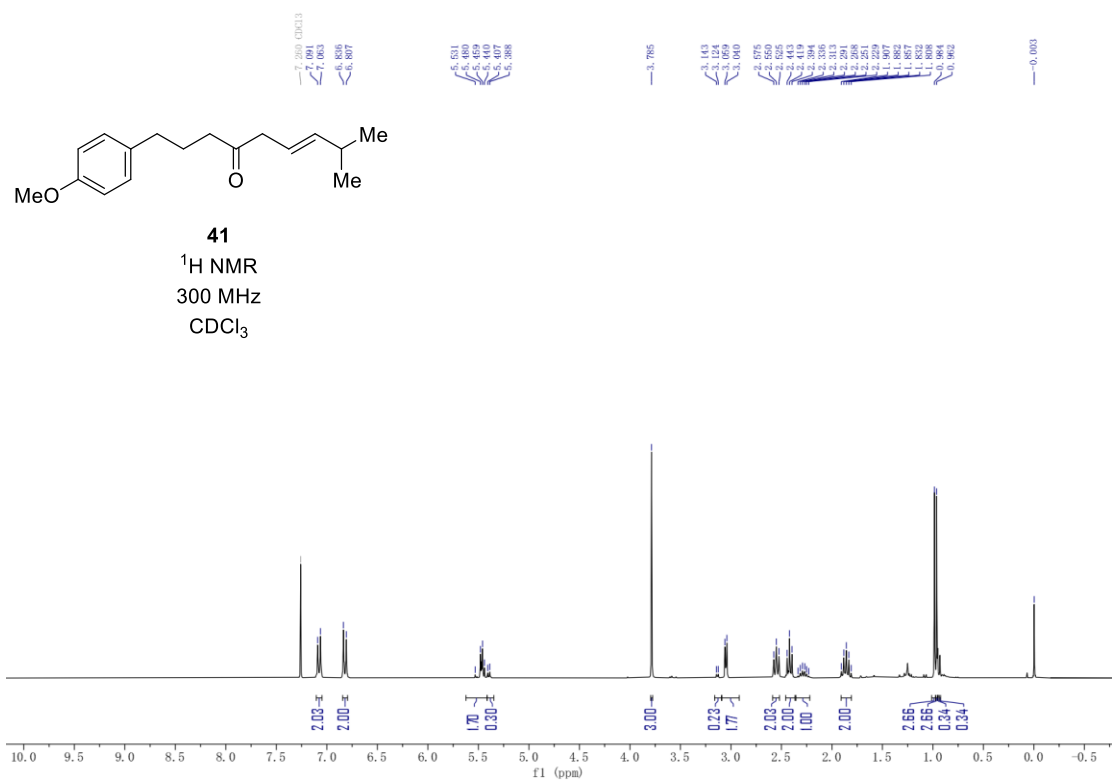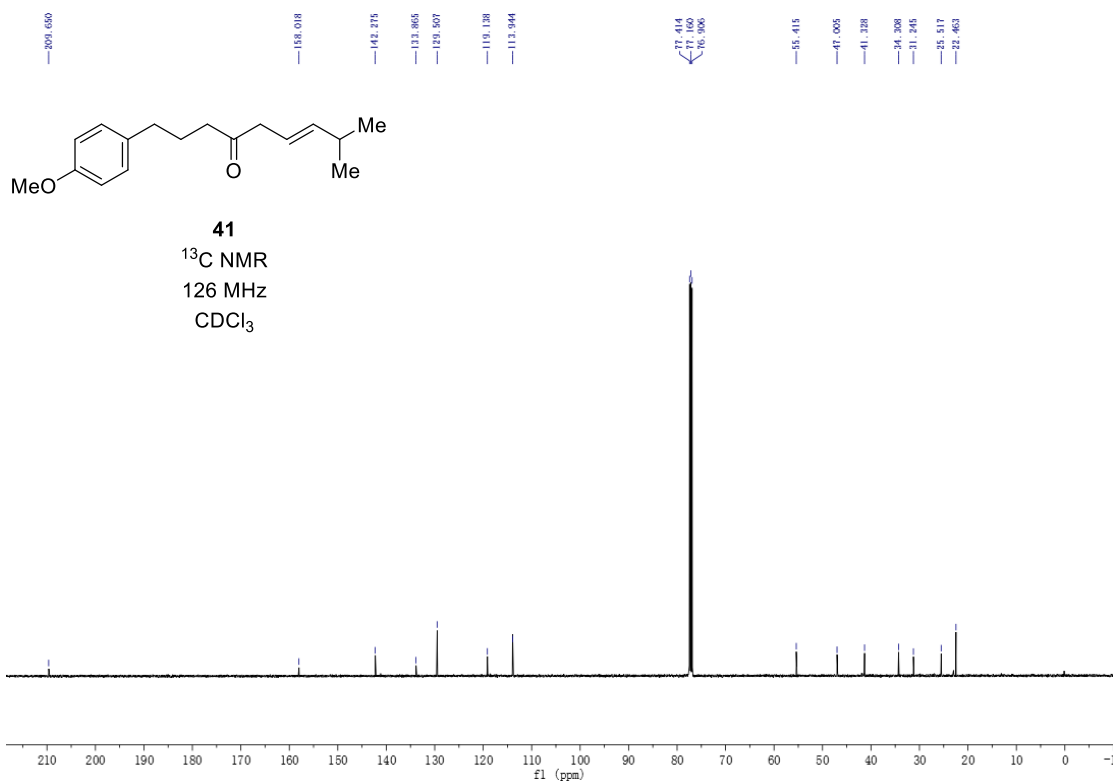

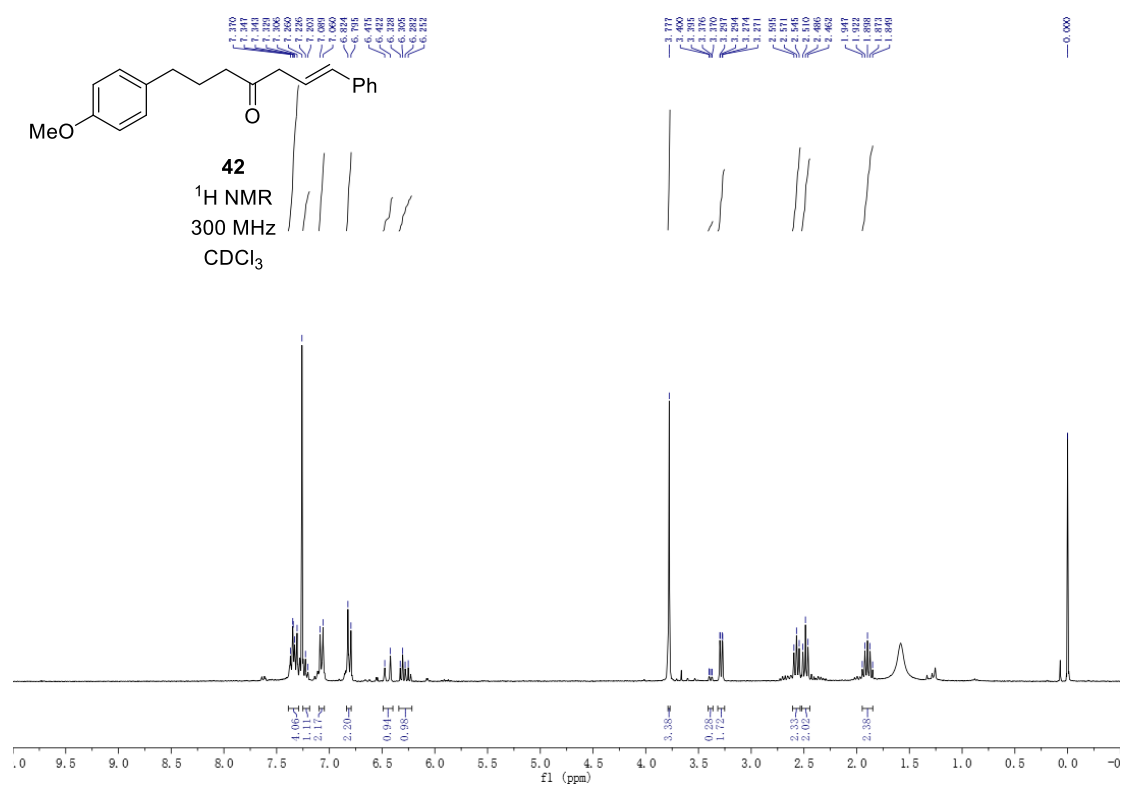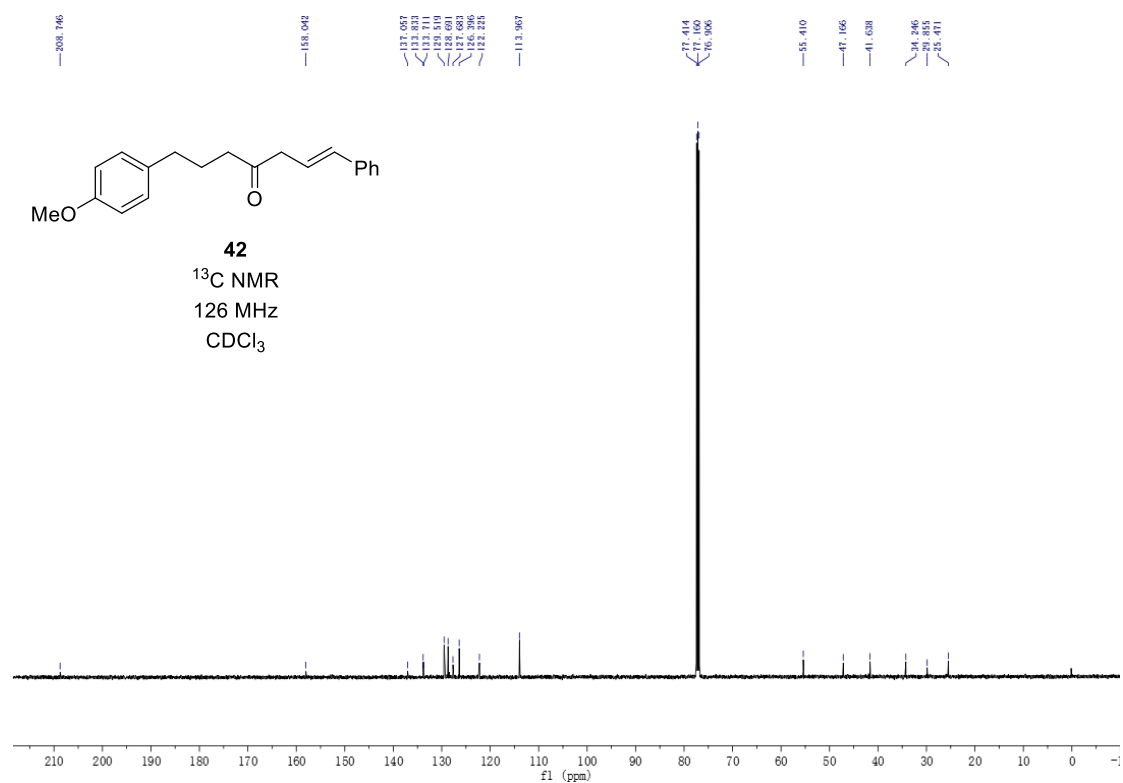

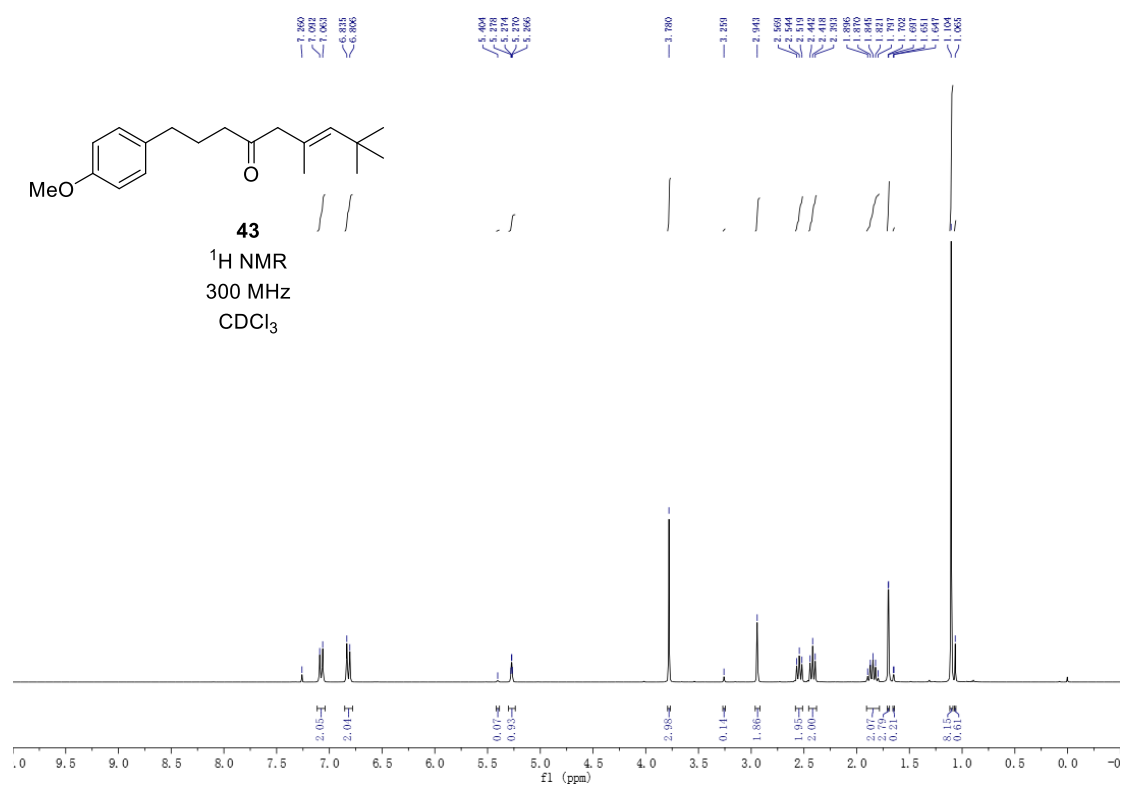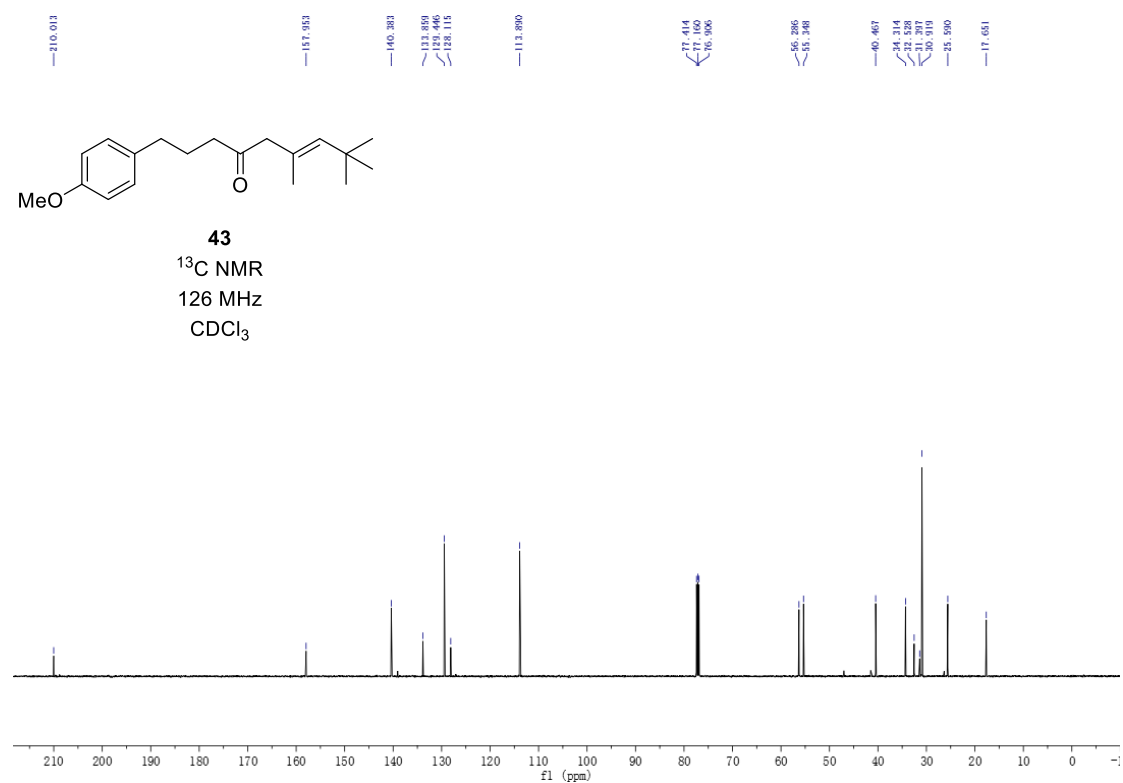

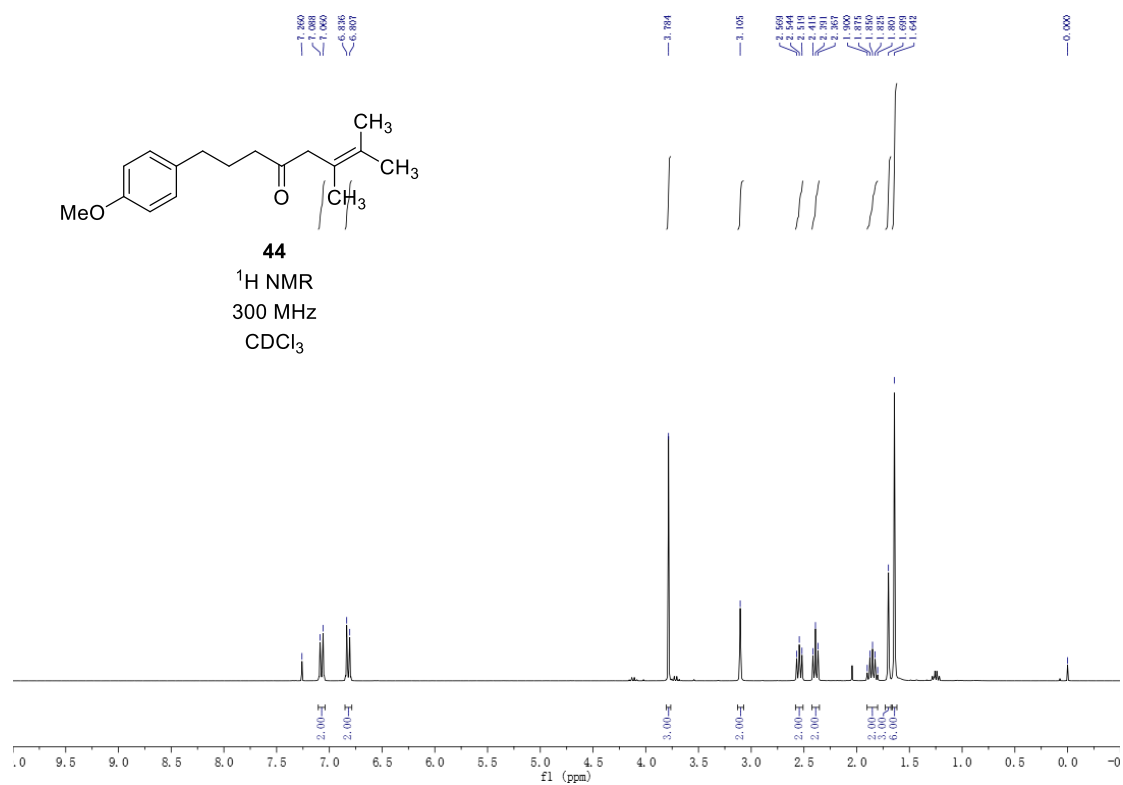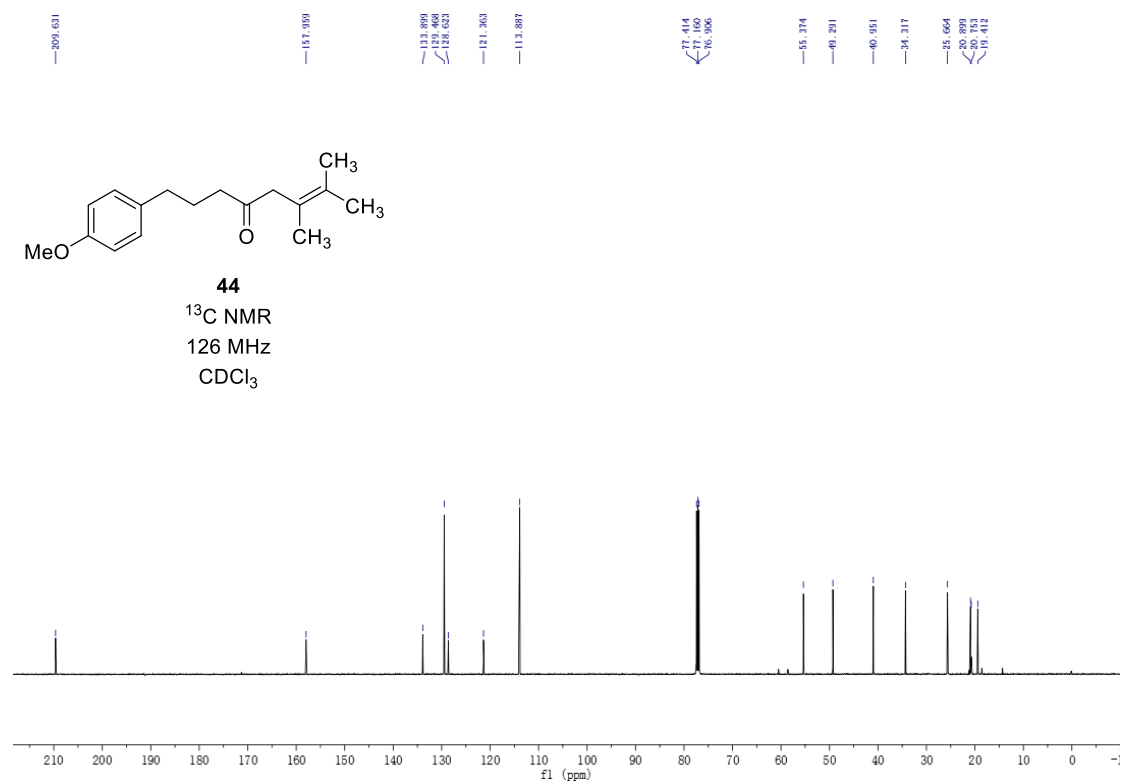

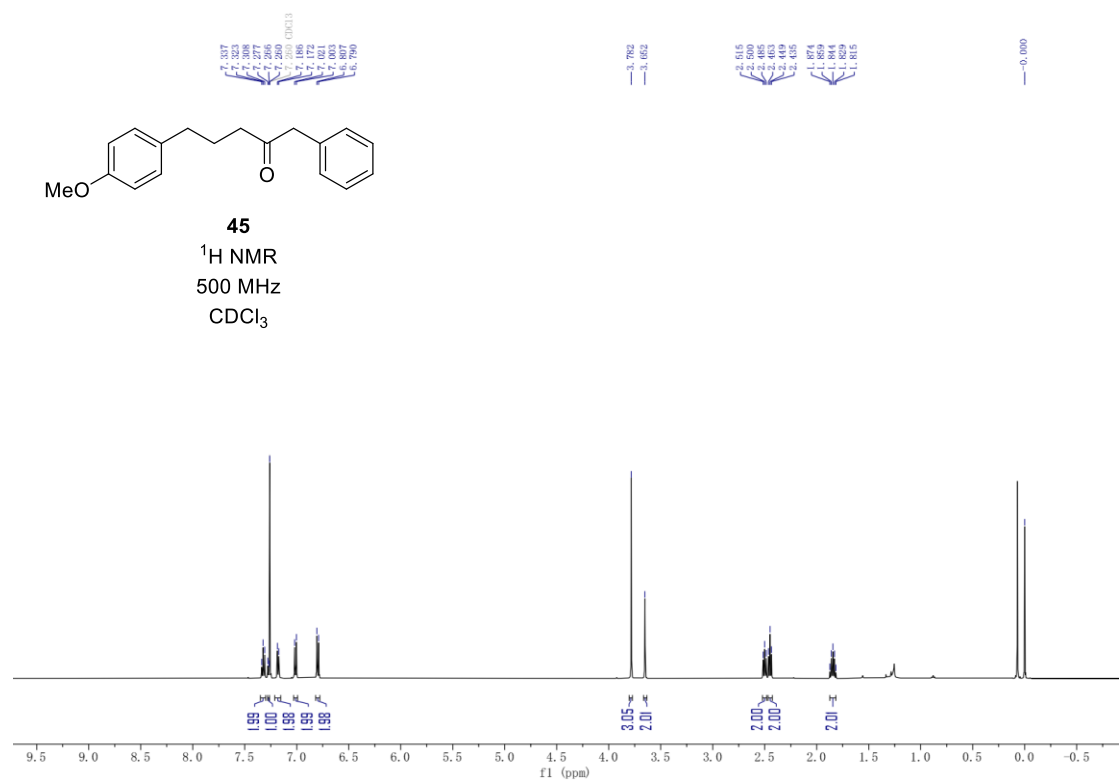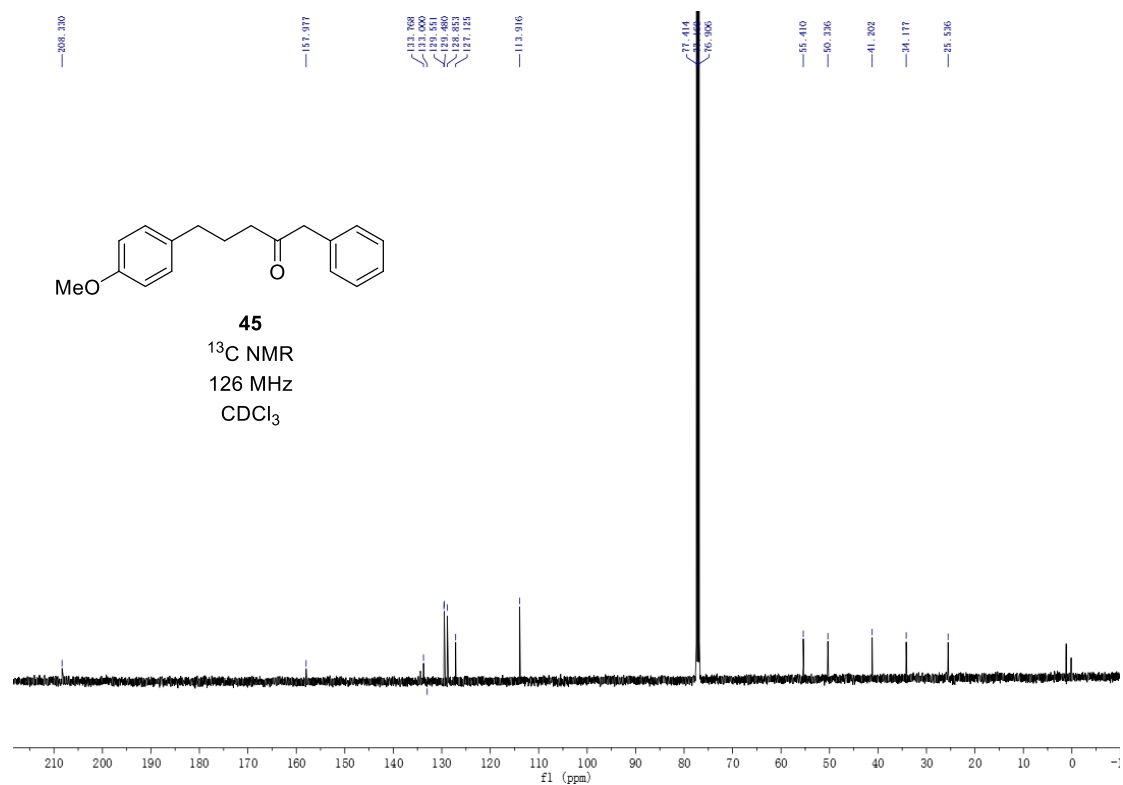

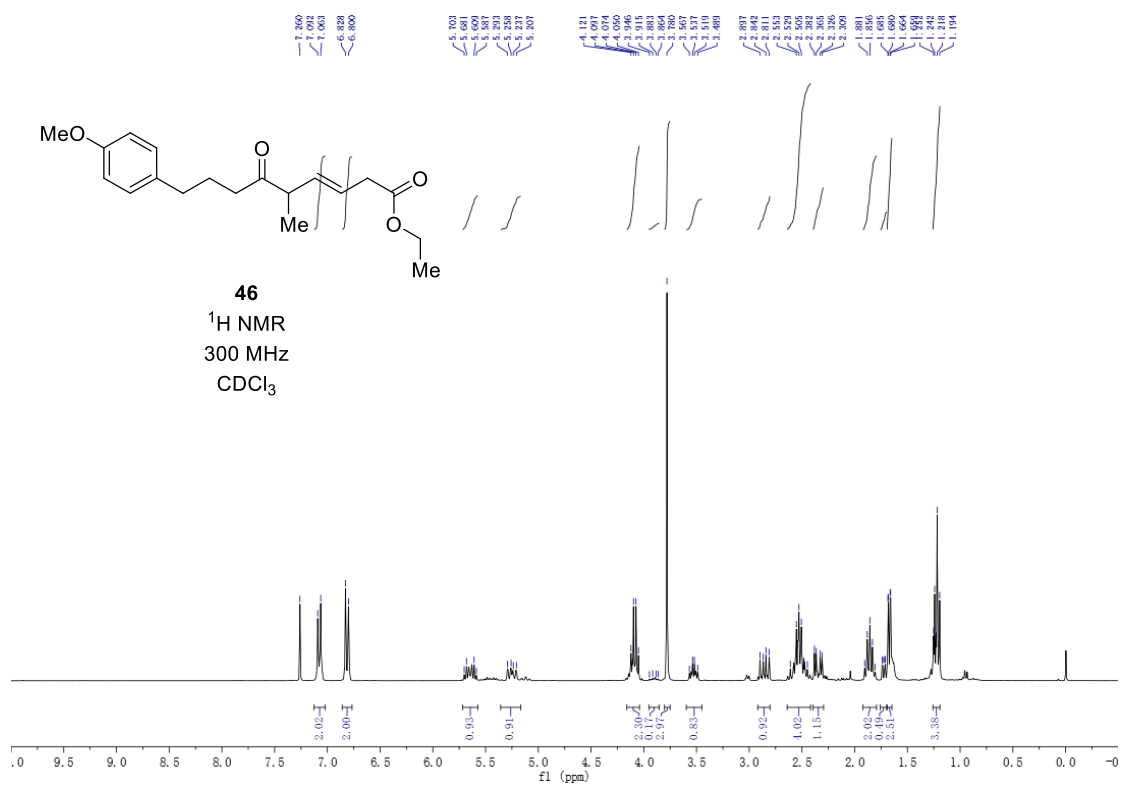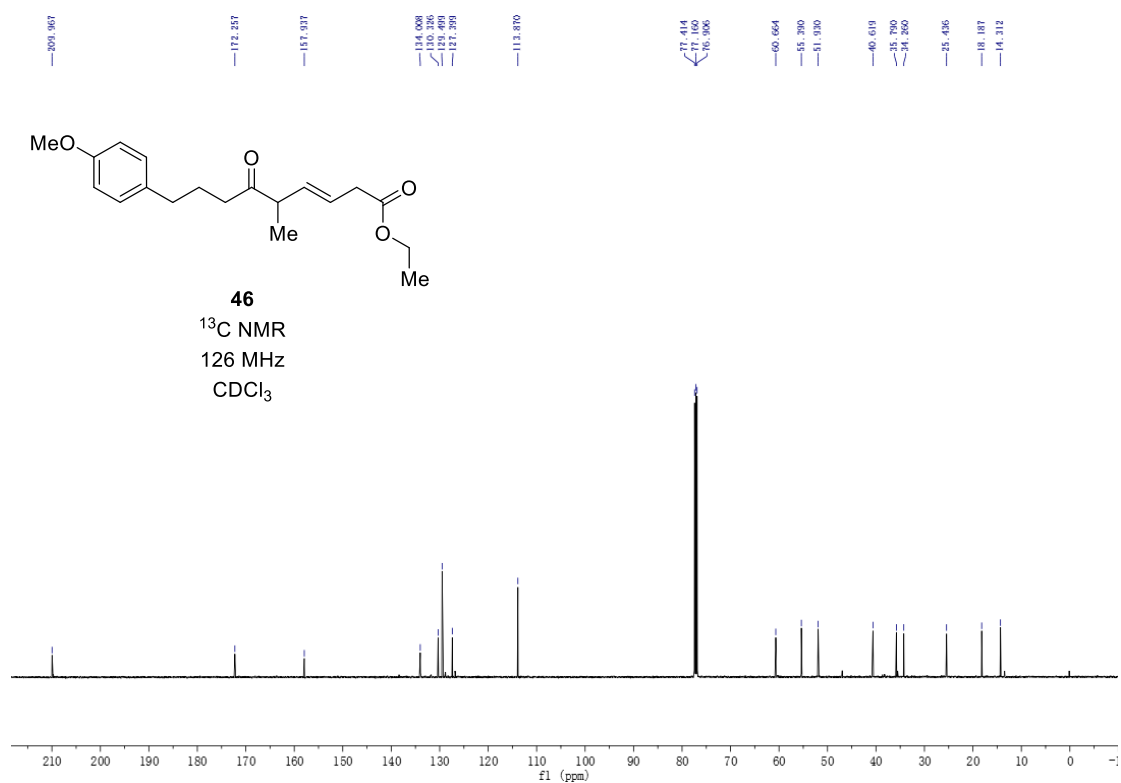







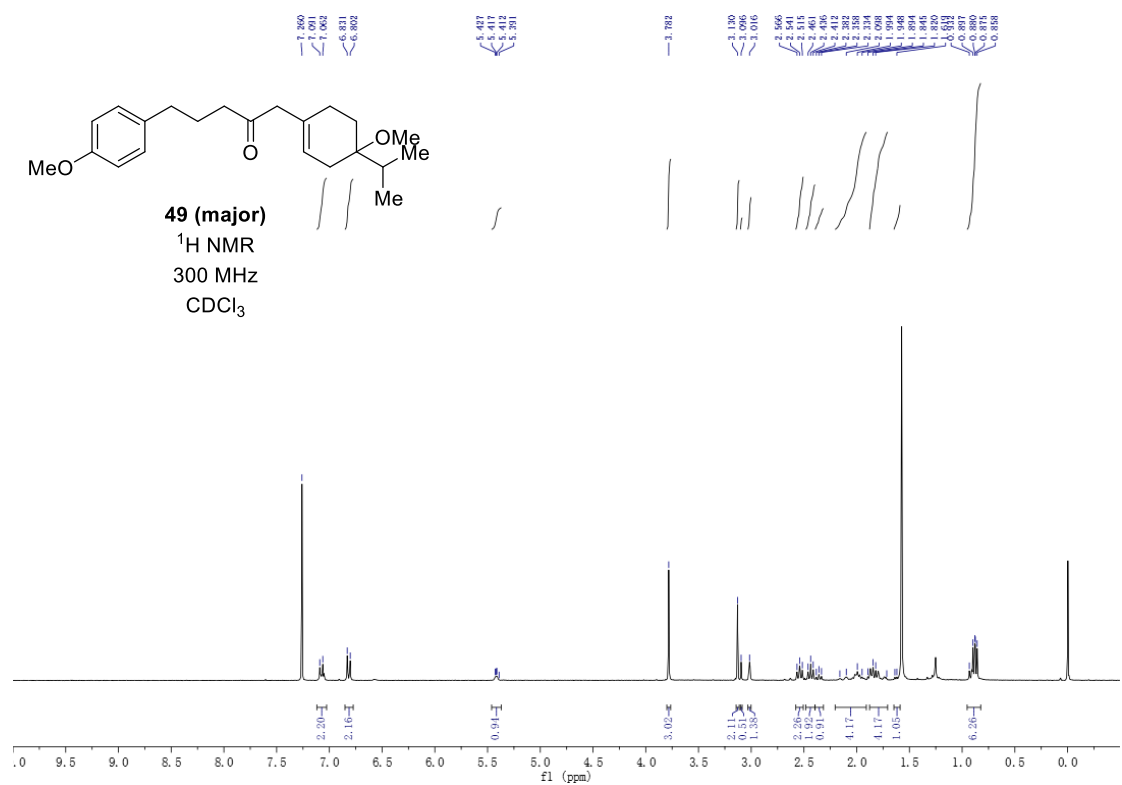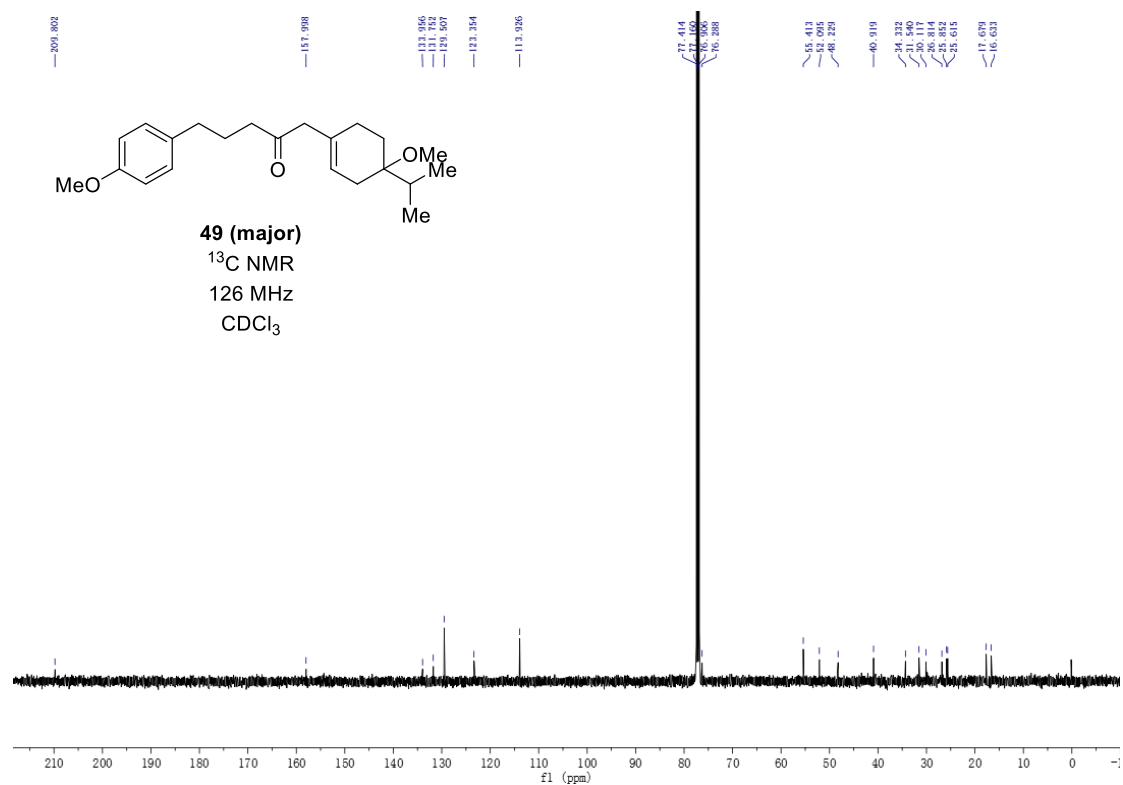

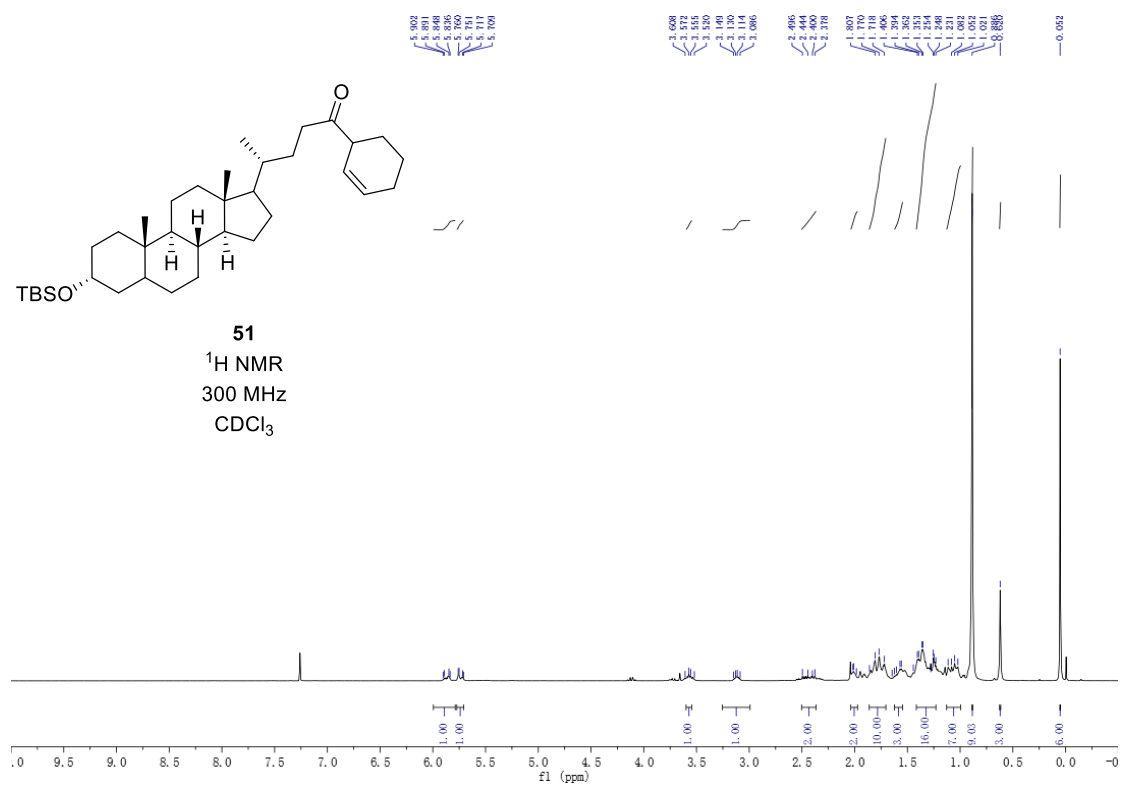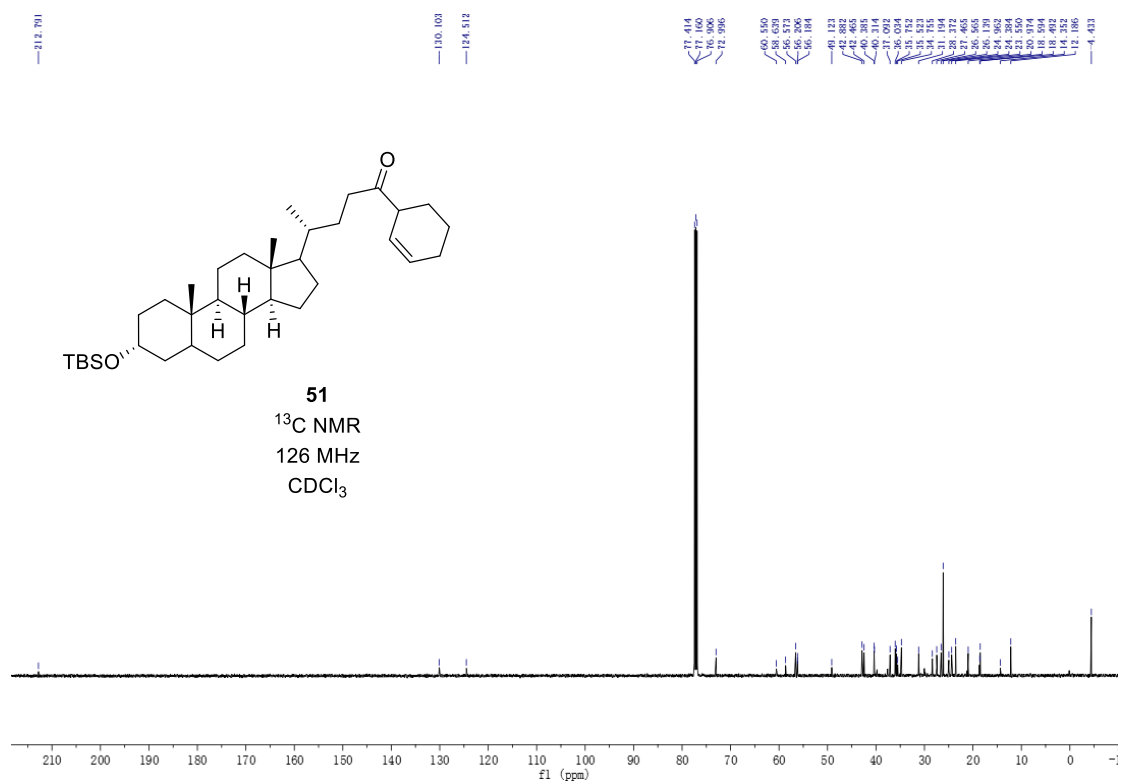

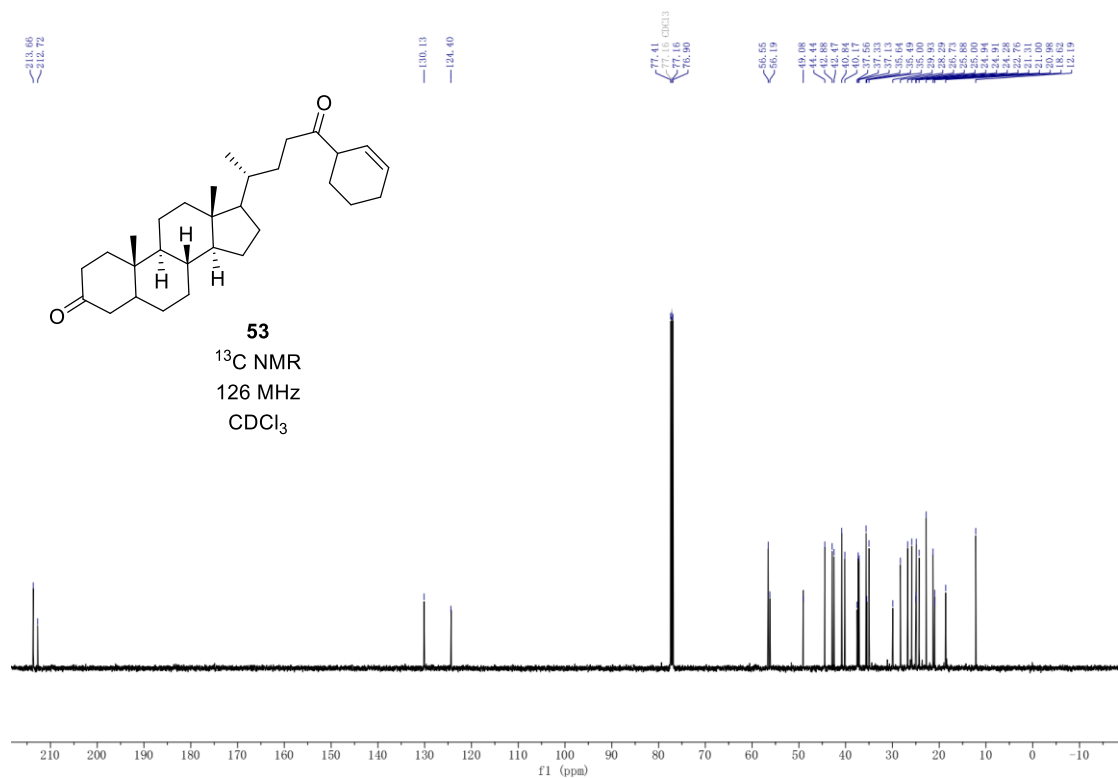

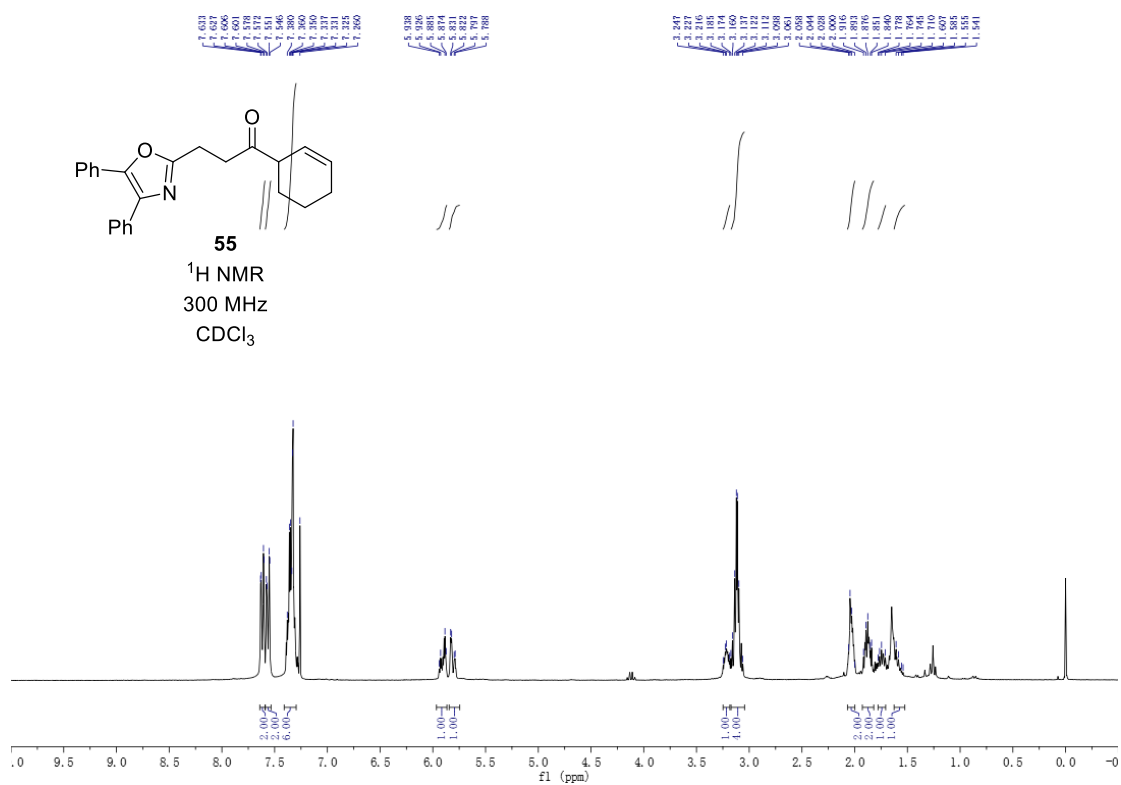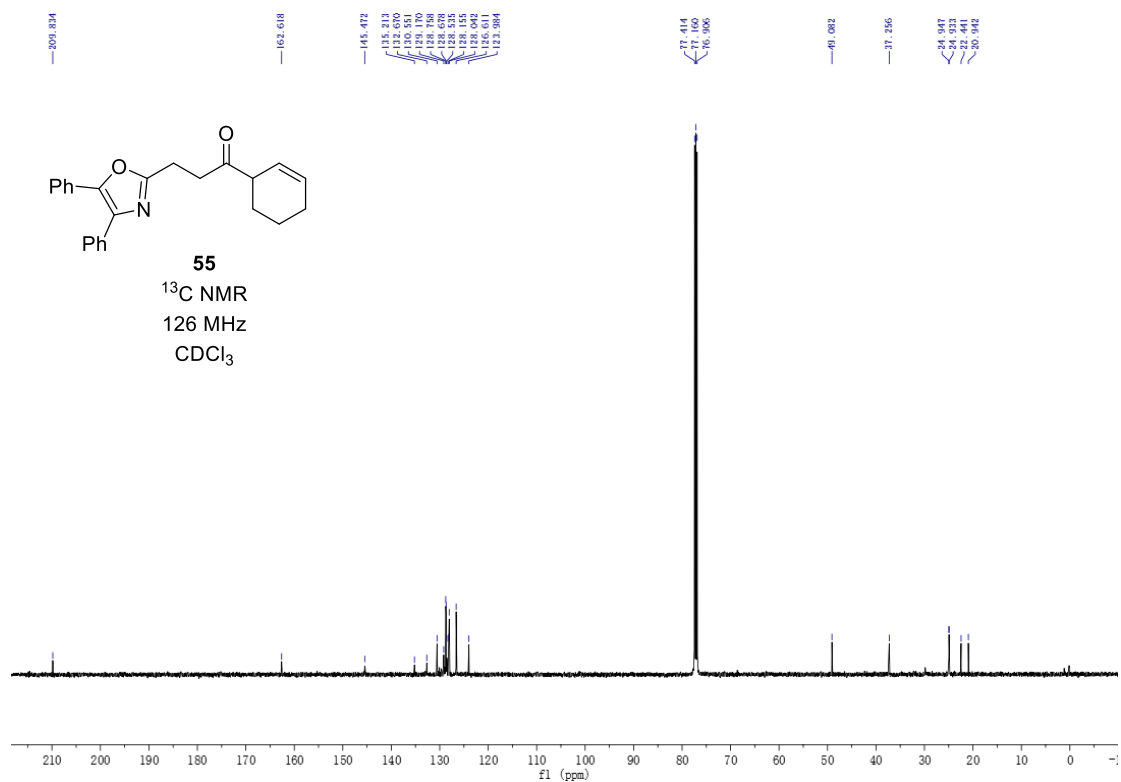

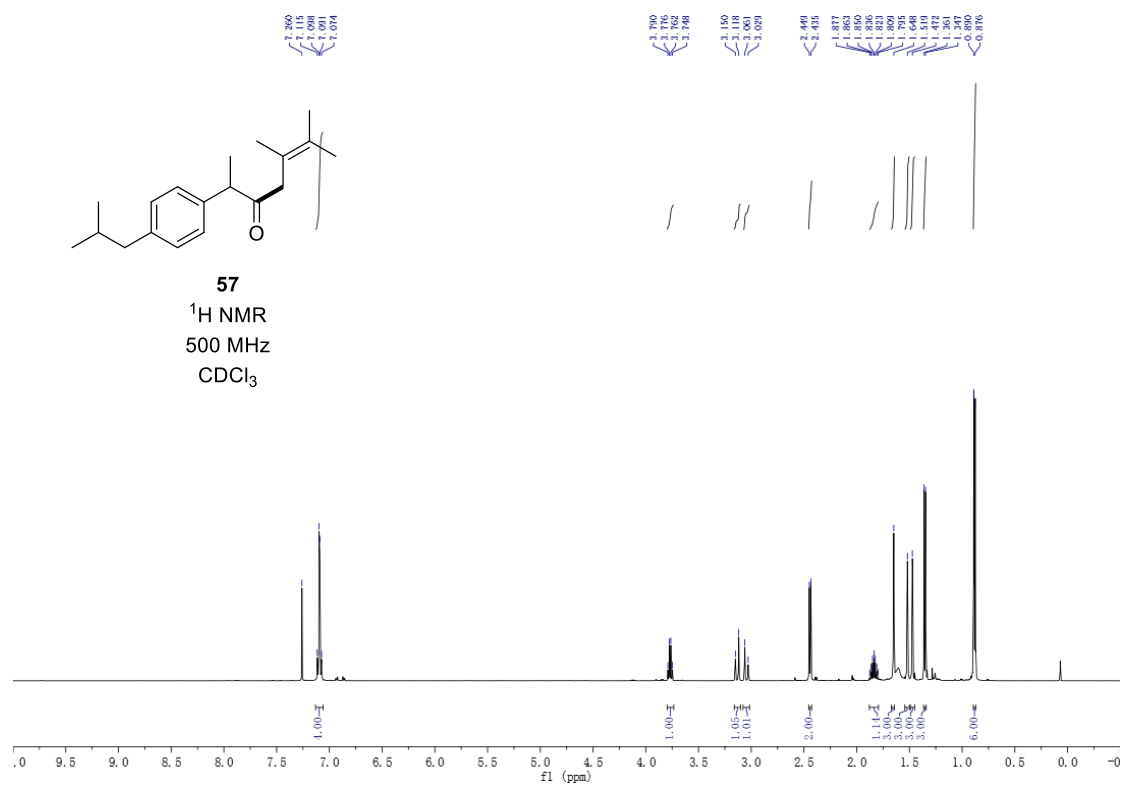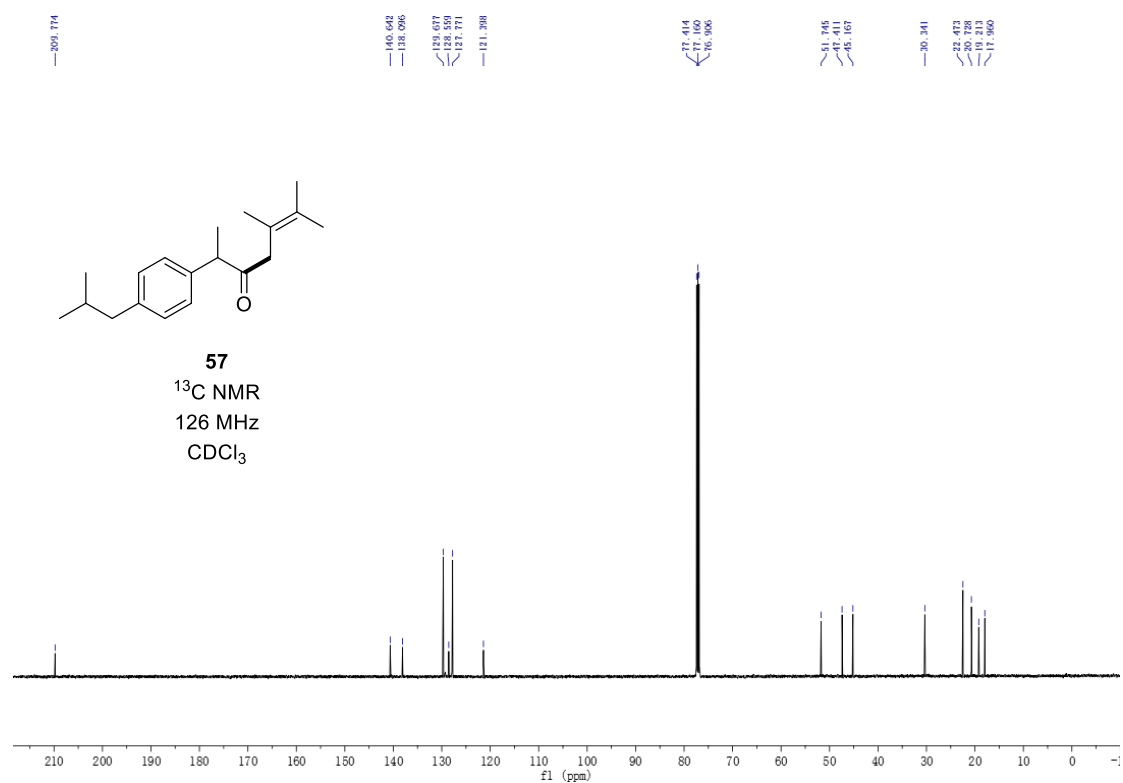

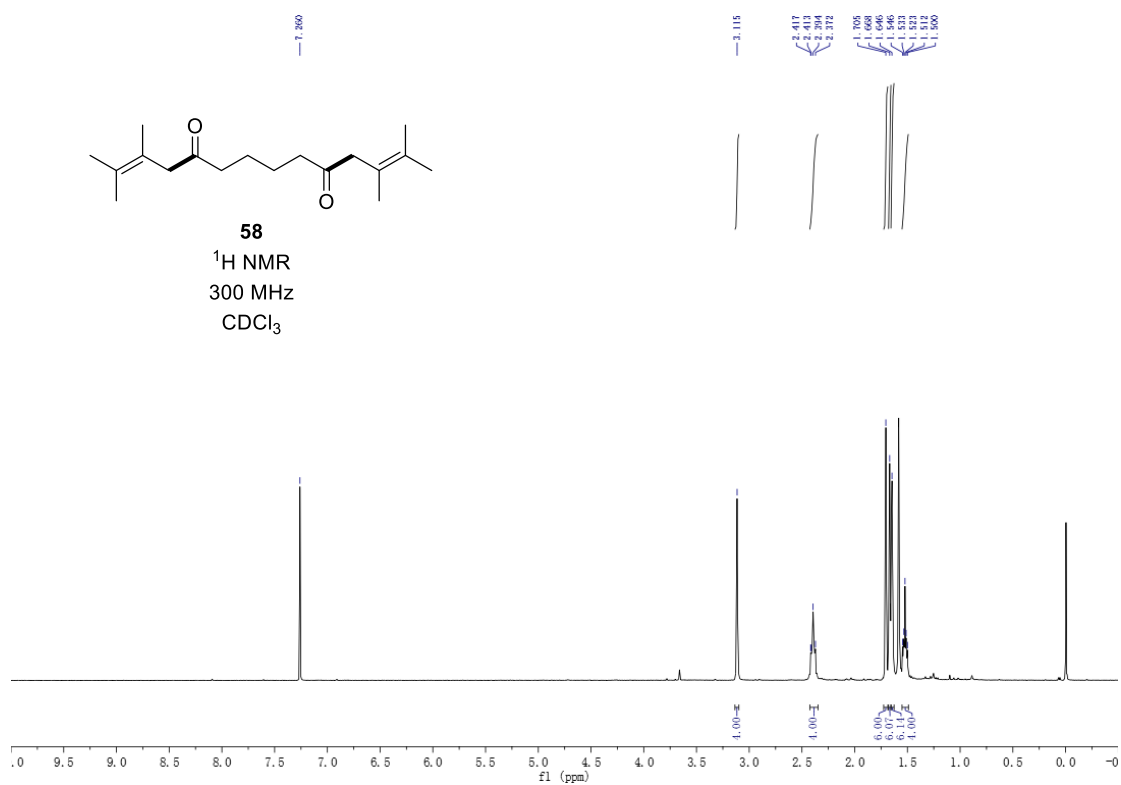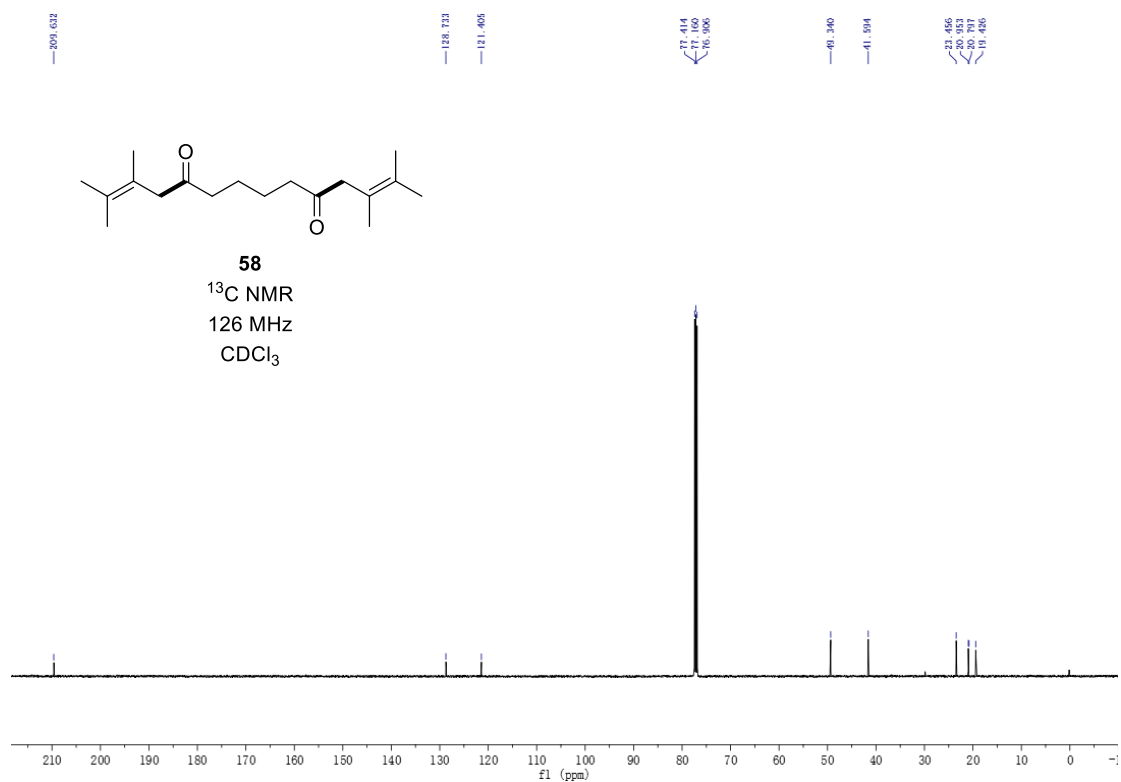

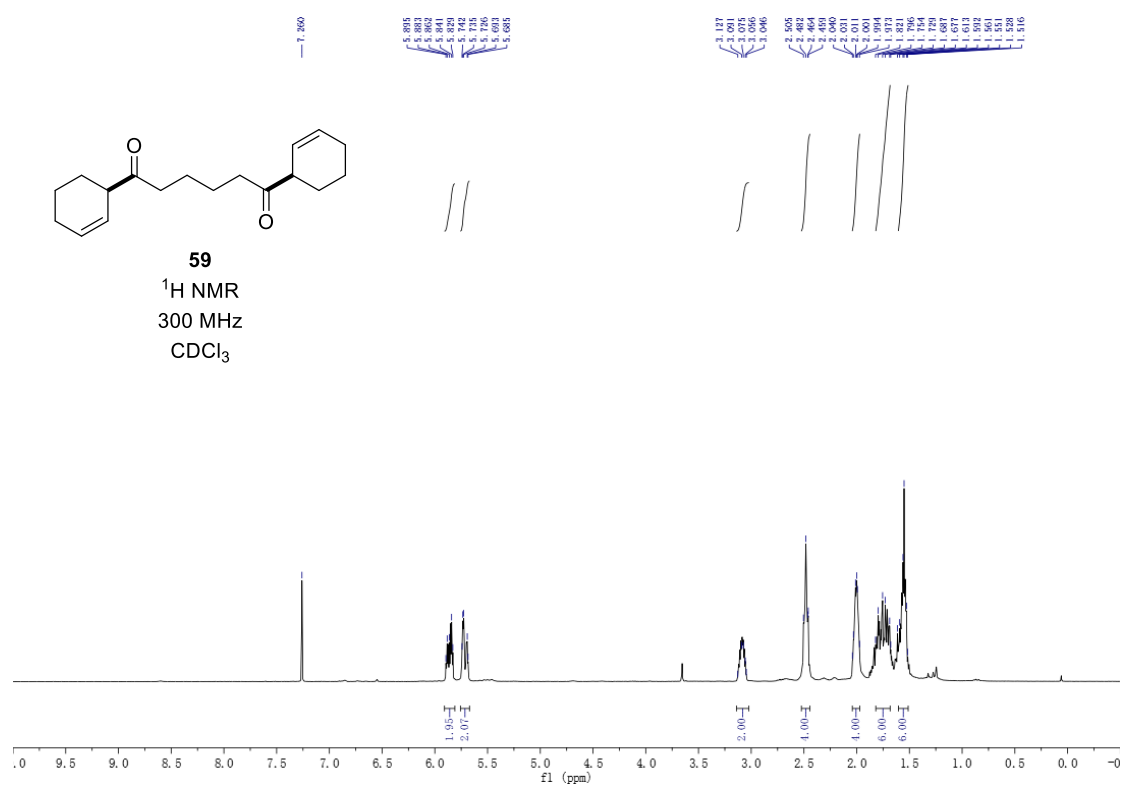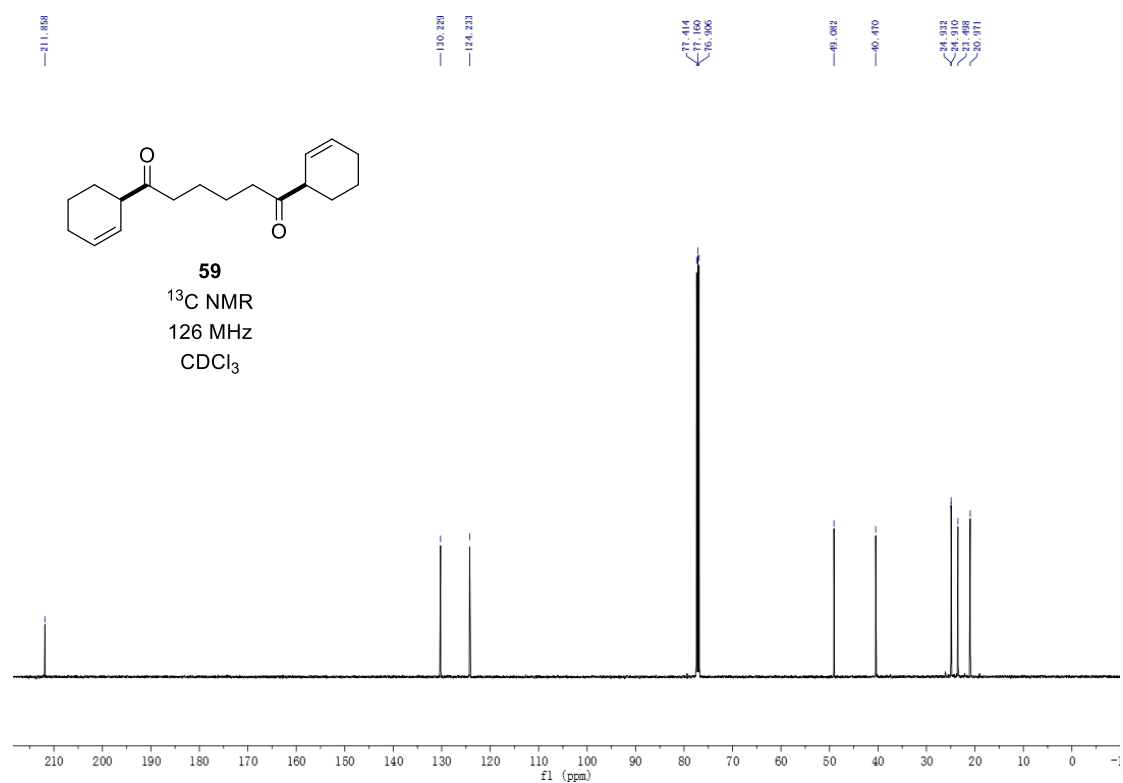



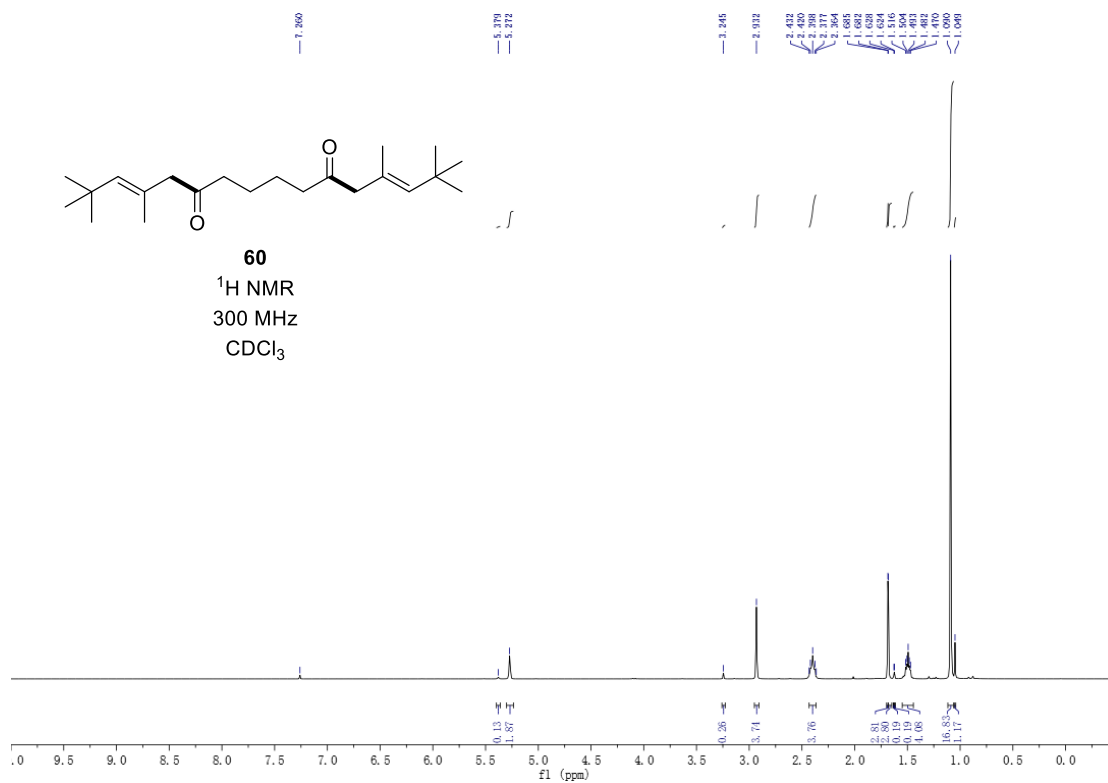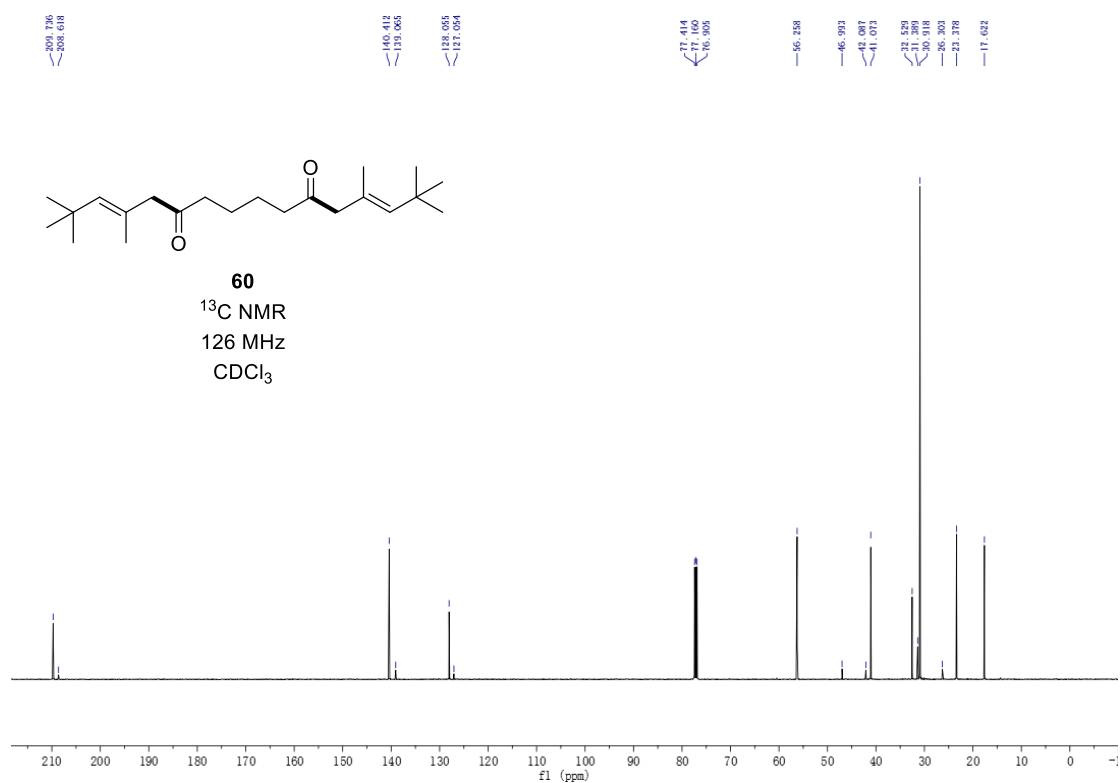

7.368  
7.362  
7.339  
7.334  
7.315  
7.295  
7.274  
7.272  
7.211  
7.206  
7.184  
7.172

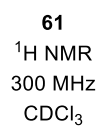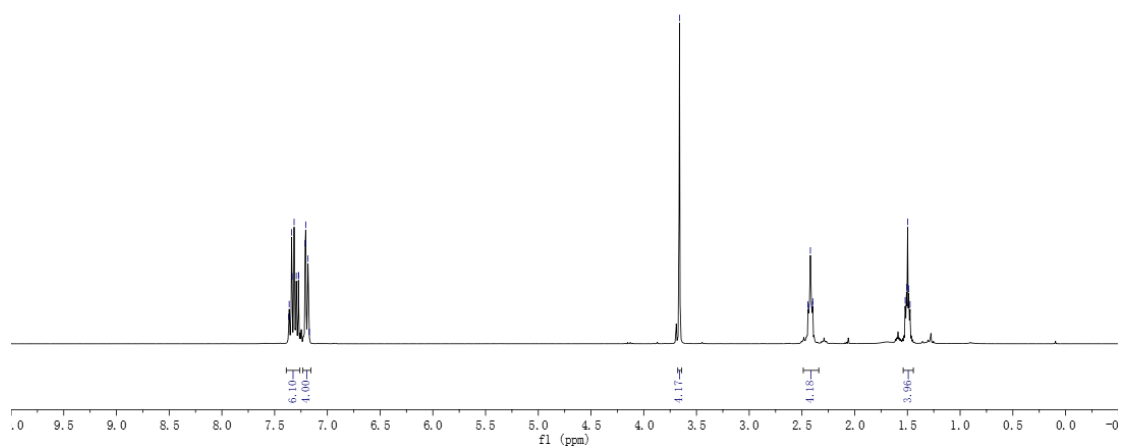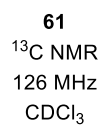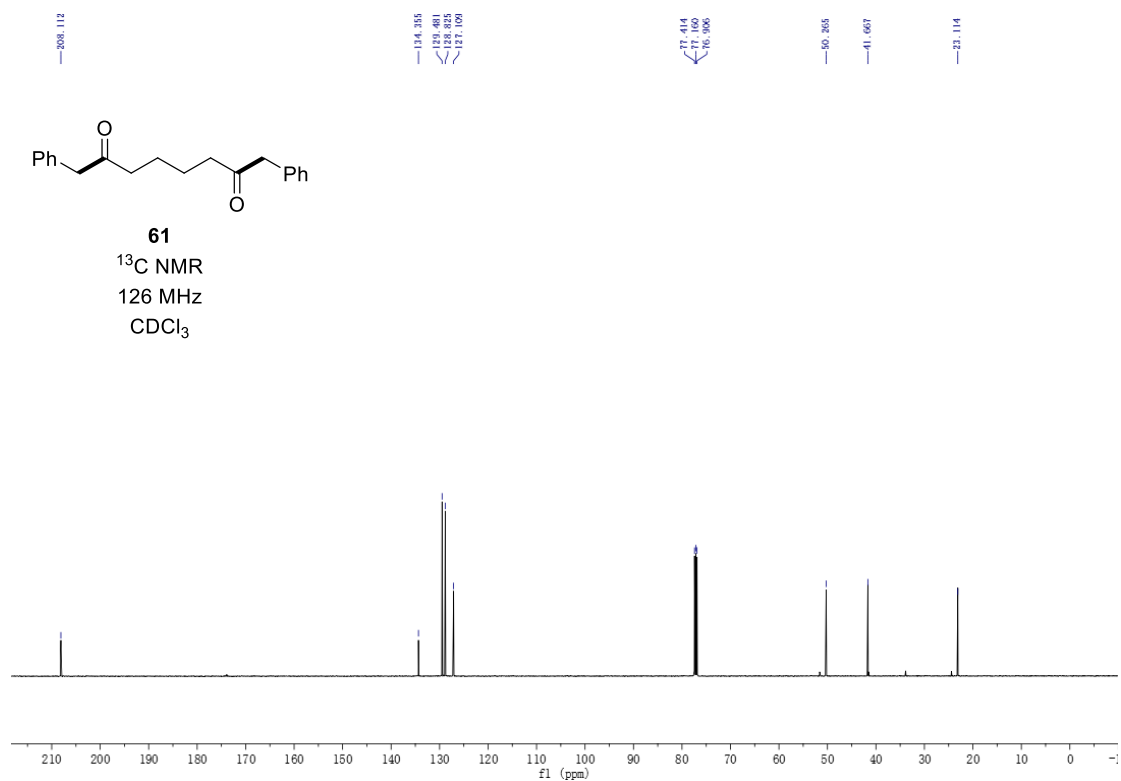

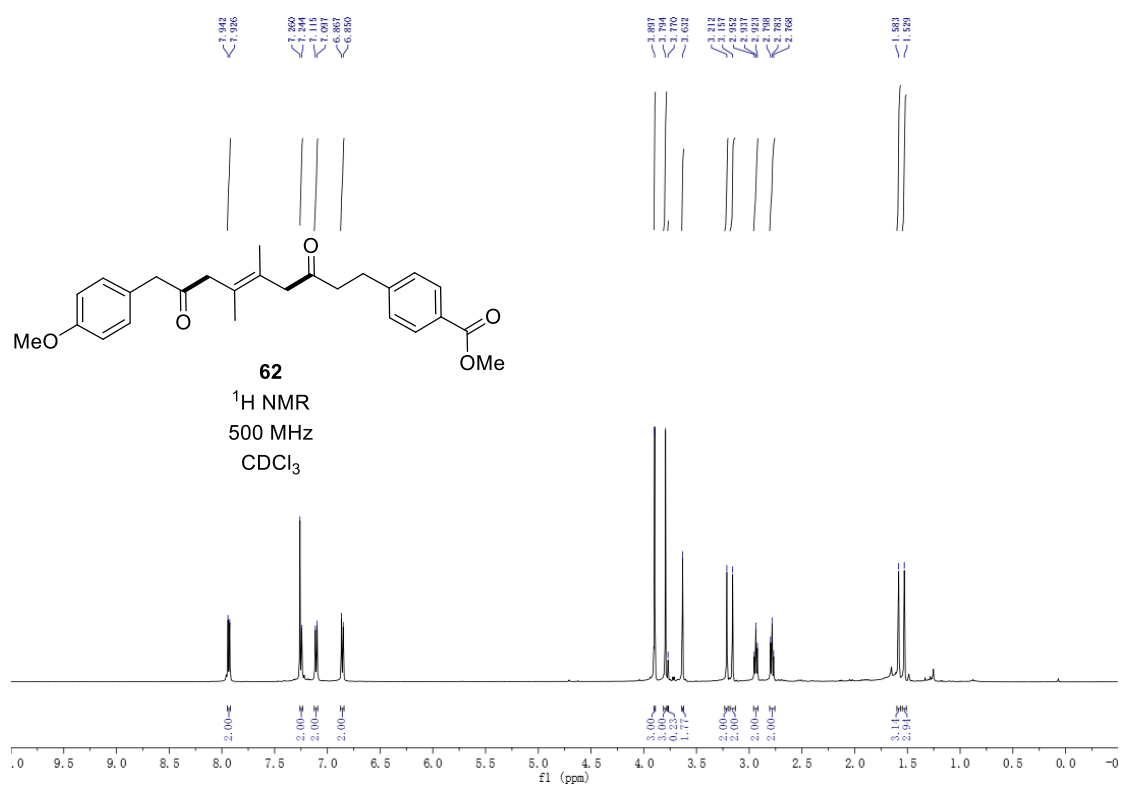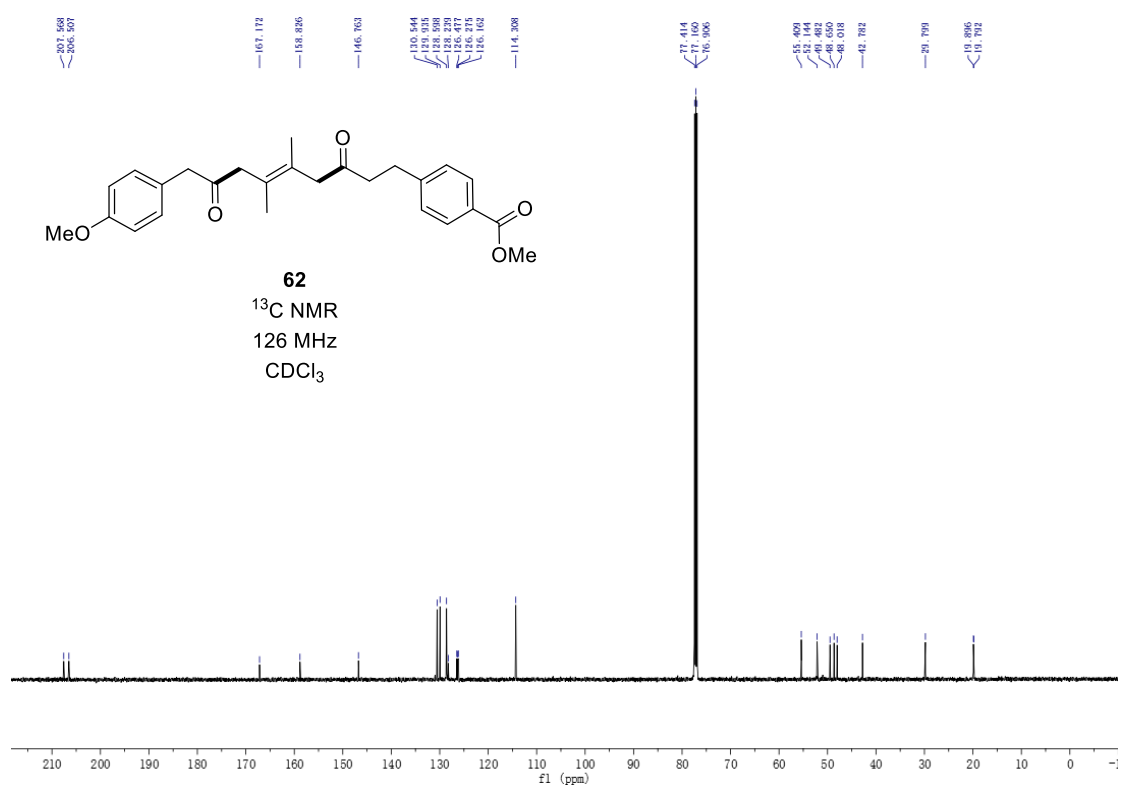

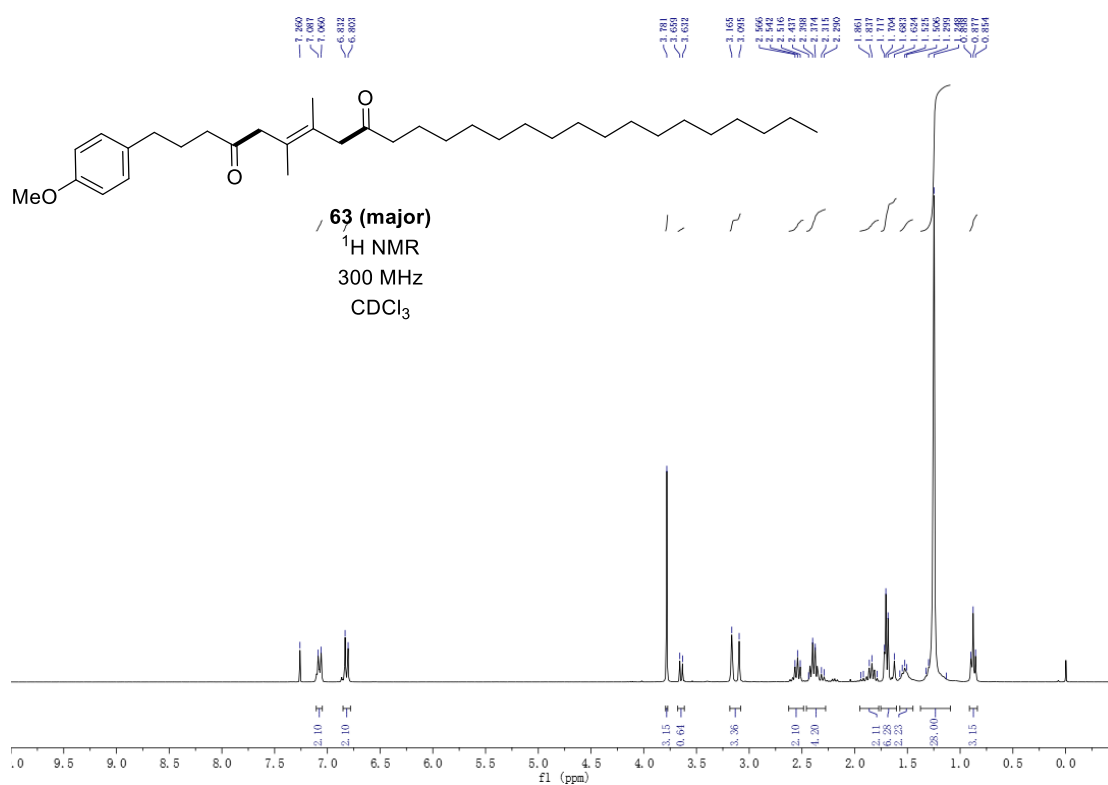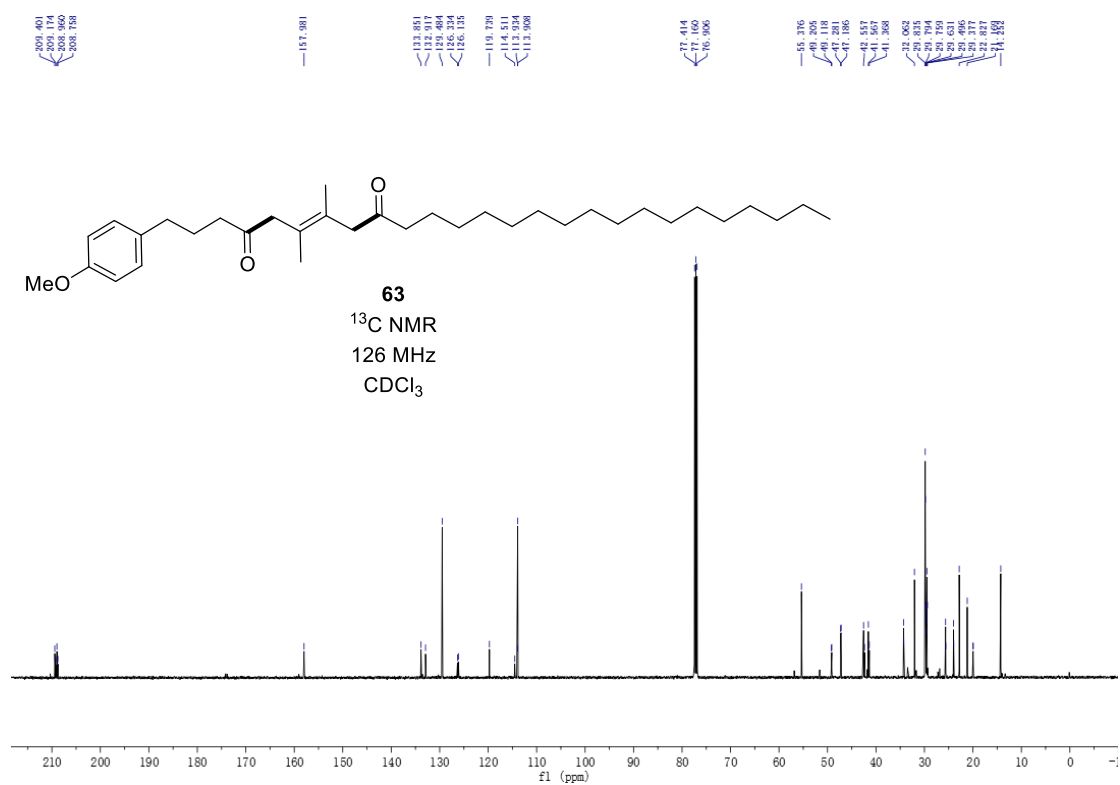



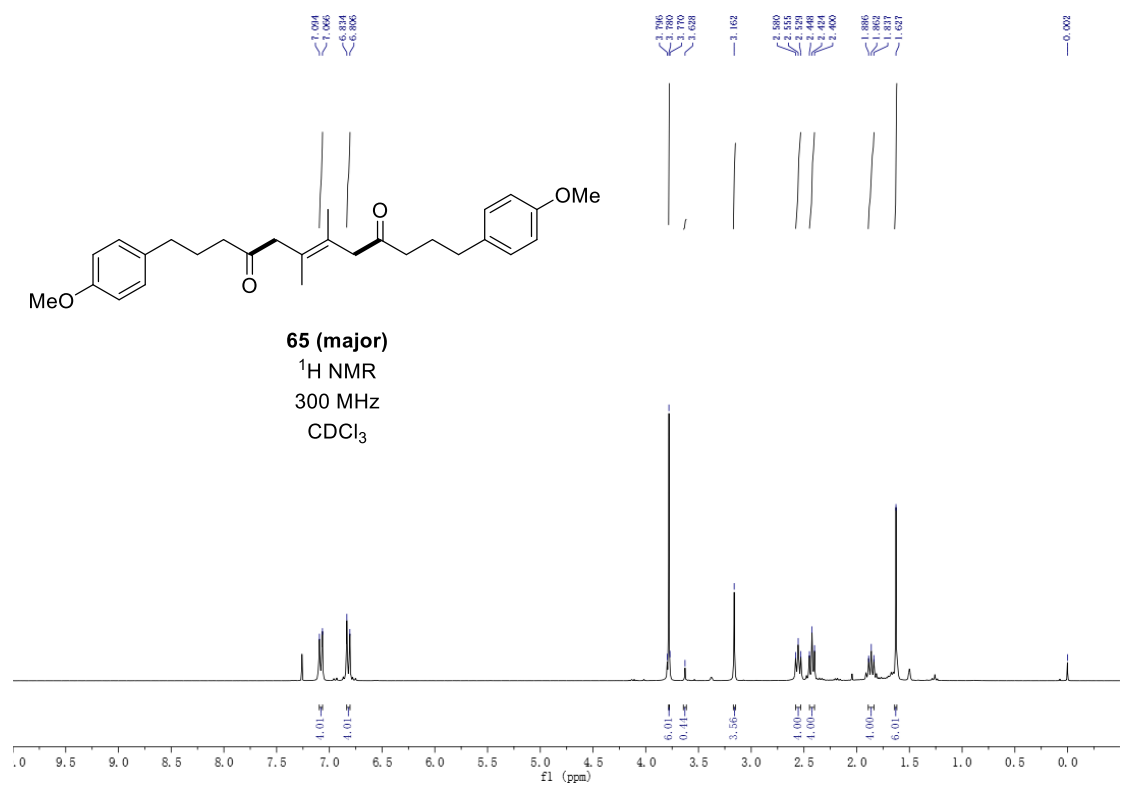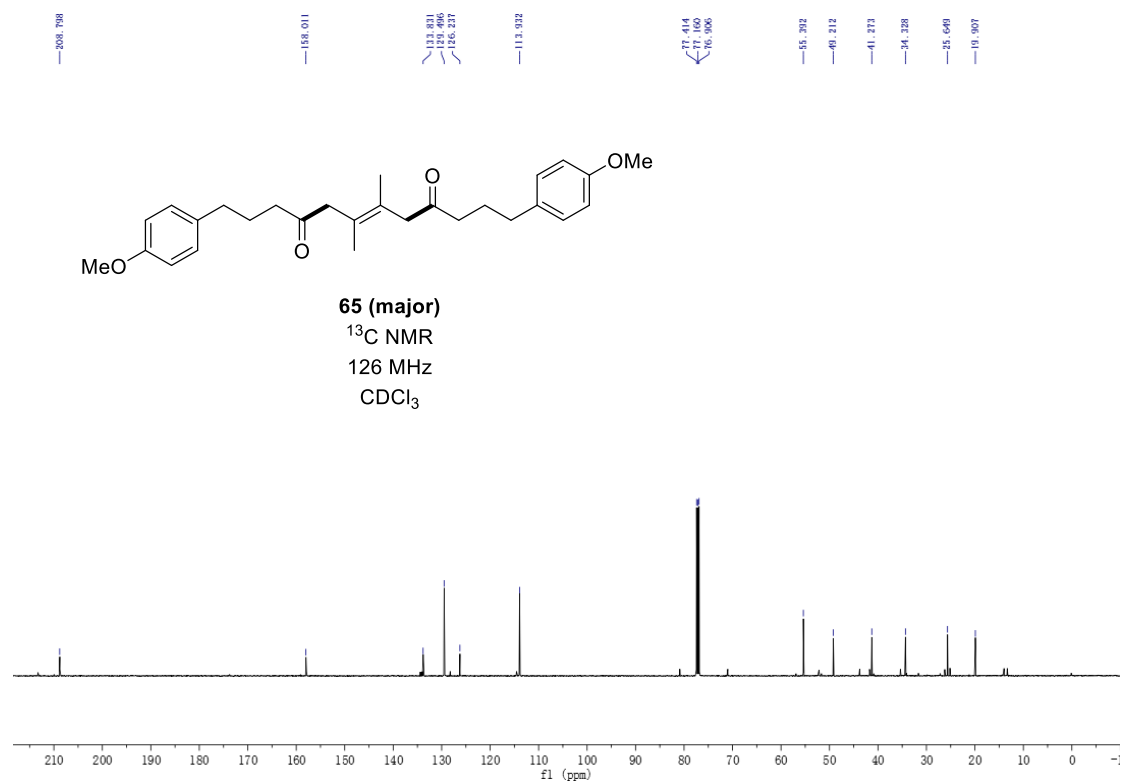

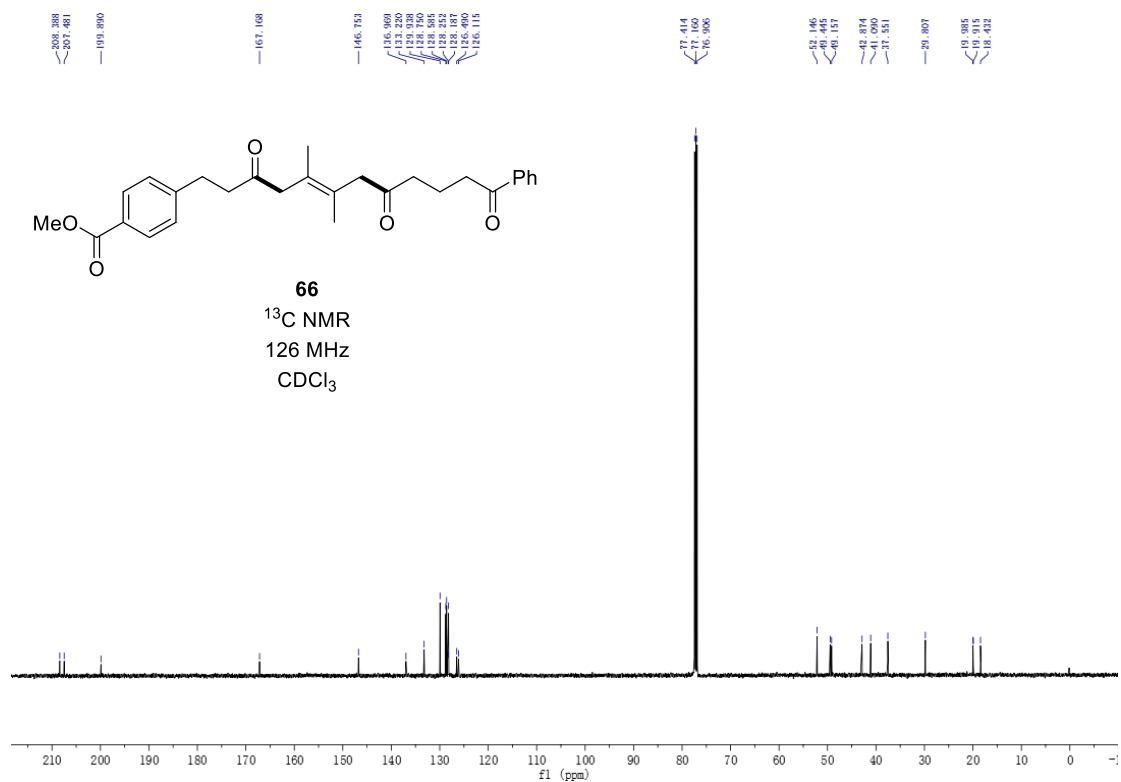

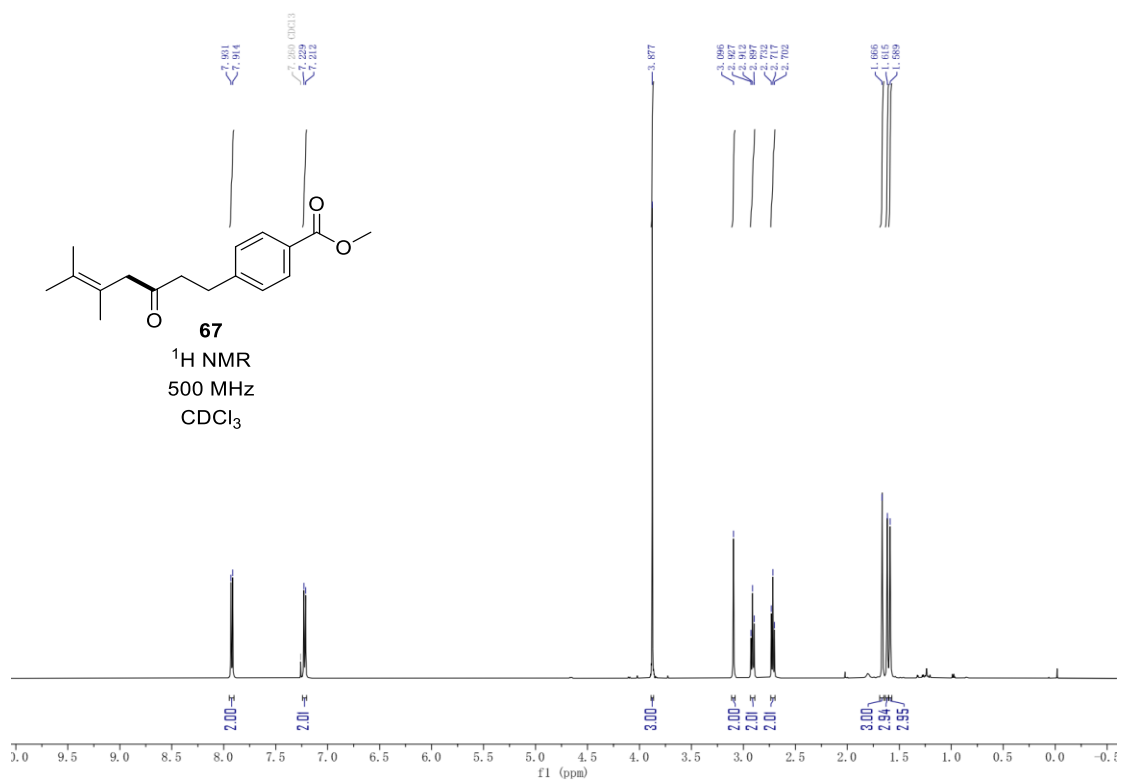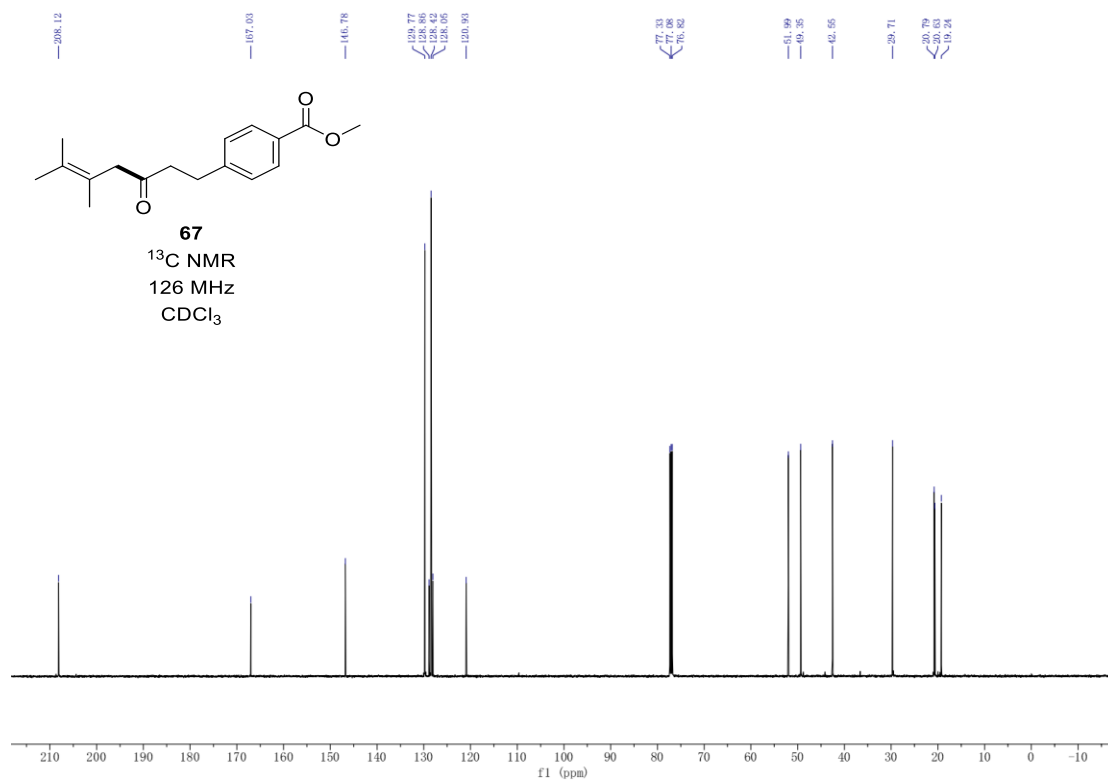

Supplement: d5gc04541j1.pdf [file d5gc04541j1.pdf]
